# Supplementary material for: Integrative analysis reveals novel insights into juvenile idiopathic arthritis pathogenesis and shared molecular pathways with associated traits
Source: Front Genet. 2024 Aug 8;15:1448363. doi: 10.3389/fgene.2024.1448363 (PMC11338781; doi:10.3389/fgene.2024.1448363)
Supplement: Supplementary file 2 [file Table1.XLSX]

## Sheet: ST_1
Table S1. Hi-C datasets used to construct the blood GRN.
Cell line	replicate samples	Resolution	GEO IDs of replicate samples	ref	ref link
Peripheral blood T cells	replicate 1	40 kb	GSM3967114	Kloetgen	https://www.biorxiv.org/content/10.1101/724427v1
	replicate 2	40 kb	GSM3967115
Peripheral blood CD4+ T cells	replicate 1	50 kB	GSM2827786	Johanson TM, Coughlan HD, Lun ATL, Bediaga NG et al. Genome-wide analysis reveals no evidence of trans chromosomal regulation of mammalian immune development. PLoS Genet 2018 Jun;14(6):e1007431. PMID: 29883495	https://www.ncbi.nlm.nih.gov/pubmed/29883495
	replicate 2	50 kB	GSM2827787
Peripheral blood CD8+ T cells	replicate 1	50 kB	GSM2827788
	replicate 2	50 kB	GSM2827789
Peripheral blood B cells	replicate 1	50 kB	GSM2827790
	replicate 2	50 kB	GSM2827791

## Sheet: ST_2
Table S2. The two-sample Mendelian randomization results of blood GRN and JIA GWAS. This table only show exposures with statistically significant MR p-value (0.05/13,640)
Note : Two genes (HLA-DQA2 and HLA-DOB) showed statistically significant MR p-value, but they have Cochran Q p-value ≤ 0.05 (indicating significant heterogeneity; see Table S3), so they were removed from the final causal gene list.
exposure	Instrumental_variables	method	beta	standard error (beta)	lower 95% CI (beta)	upper 95% CI (beta)	odds ratio	lower 95% CI (odds ratio)	upper 95% CI (odds ratio)	MR P-value	Cytogenetic band of gene
HLA-DQB2	rs2621331	Wald ratio	2.26191	0.159866	1.94858	2.57525	9.60144	7.01869	13.1346	1.89908e-45	6p21.3
C6orf48	rs140091914	Wald ratio	-2.25808	0.215561	-2.68058	-1.83558	0.104551	0.0685233	0.159521	1.1212e-25	6p21.3
HLA-DRB1	rs9469220	Wald ratio	-3.88742	0.394215	-4.66008	-3.11476	0.0204981	0.00946567	0.0443891	6.13236e-23	6p21.3
HSPA1B	rs565599	Wald ratio	-3.92727	0.41506	-4.74079	-3.11375	0.0196974	0.00873176	0.0444339	3.02294e-21	6p21.3
LTA	rs3219190	Wald ratio	2.38003	0.253507	1.88316	2.87691	10.8053	6.57425	17.7593	6.08944e-21	6p21.3
ABHD16A	rs614008	Wald ratio	4.4178	0.472288	3.49212	5.34349	82.9139	32.8555	209.241	8.43555e-21	6p21.3
HLA-DQA2	rs4711185, rs4959098, rs9271589	Weighted median	-0.458359	0.0495892	-0.555554	-0.361164	0.63232	0.573754	0.696864	2.39399e-20	6p21.3
EHMT2	rs3130285	Wald ratio	-5.08811	0.568803	-6.20297	-3.97326	0.00616966	0.00202342	0.018812	3.70944e-19	6p21.3
PPP1R10	rs9266639	Wald ratio	3.16859	0.35772	2.46745	3.86972	23.7739	11.7924	47.9289	8.16675e-19	6p21.3
HCG4P5	rs2517714	Wald ratio	0.635615	0.0745774	0.489443	0.781786	1.88818	1.63141	2.18537	1.55624e-17	6p22.1
AGER	rs204995	Wald ratio	-1.92192	0.231358	-2.37539	-1.46846	0.146325	0.0929786	0.230279	9.80246e-17	6p21.3
PBX2	rs204995	Wald ratio	2.07245	0.249477	1.58347	2.56142	7.94422	4.87183	12.9542	9.80246e-17	6p21.3
IFITM4P	rs9368609	Wald ratio	0.396905	0.0480069	0.302812	0.490999	1.48721	1.35366	1.63395	1.36599e-16	6p22.1
HLA-L	rs9265912	Wald ratio	0.305485	0.0370009	0.232963	0.378007	1.35728	1.26234	1.45937	1.50439e-16	6p22.1
DDAH2	rs9267551	Wald ratio	-2.5876	0.316115	-3.20719	-1.96802	0.0751999	0.0404702	0.139733	2.70834e-16	6p21.3
GPANK1	rs13211318	Wald ratio	-3.18031	0.392423	-3.94946	-2.41116	0.0415727	0.0192651	0.089711	5.30561e-16	6p21.3
FKBPL	rs12153855	Wald ratio	-1.18433	0.146653	-1.47176	-0.896886	0.305952	0.22952	0.407838	6.70823e-16	6p21.3
NCR3	rs986475	Wald ratio	-1.83736	0.238182	-2.3042	-1.37052	0.159237	0.0998389	0.253974	1.21846e-14	6p21.3
DXO	rs15574	Wald ratio	-2.28941	0.312321	-2.90156	-1.67726	0.101326	0.0549373	0.186885	2.2962e-13	6p21.3
MSH5	rs2395153, rs7764682	Inverse variance weighted	-2.77105	0.386127	-3.52786	-2.01424	0.0625961	0.0293677	0.133421	7.15008e-13	6p21.3
TRIM26	rs929156	Wald ratio	-1.44711	0.20471	-1.84834	-1.04588	0.235249	0.157498	0.351383	1.55979e-12	6p22.1
EGFL8	rs204898	Wald ratio	2.5212	0.357262	1.82097	3.22144	12.4436	6.17784	25.0641	1.70121e-12	6p21.3
HLA-F-AS1	rs1736913	Wald ratio	0.602876	0.0856265	0.435048	0.770704	1.82737	1.54504	2.16129	1.91191e-12	6p22.1
LY6G6F	rs760294	Wald ratio	3.23847	0.465019	2.32703	4.14991	25.4947	10.2475	63.4282	3.30333e-12	6p21.3
HLA-A	rs9260114	Wald ratio	1.35618	0.199297	0.965562	1.74681	3.88135	2.62626	5.73625	1.01161e-11	6p22.1
HCG9	rs1610586	Wald ratio	0.601174	0.0895922	0.425573	0.776775	1.82426	1.53047	2.17445	1.94478e-11	6p22.1
GPSM3	rs28752784	Wald ratio	-5.40665	0.816486	-7.00696	-3.80634	0.00448664	0.000905553	0.0222294	3.54716e-11	6p22.1
PSMB8	rs12529313	Wald ratio	2.17132	0.333379	1.5179	2.82474	8.76987	4.56263	16.8566	7.36273e-11	6p21.3
IL6ST	rs13186299	Wald ratio	-1.75217	0.269508	-2.28041	-1.22393	0.173397	0.102243	0.294071	7.95972e-11	5q11.2
HCG4P11	rs2517910	Wald ratio	-0.605854	0.0946661	-0.791399	-0.420308	0.545608	0.45321	0.656844	1.55477e-10	6p21.3
SLC25A20	rs2853915	Wald ratio	2.34233	0.369719	1.61768	3.06698	10.4055	5.04139	21.477	2.36678e-10	3p21.3
TAP1	rs3763348	Wald ratio	1.48105	0.254162	0.982892	1.97921	4.39756	2.67217	7.237	5.63697e-09	6p21.3
HLA-T	rs9265961	Wald ratio	0.356532	0.0638507	0.231385	0.48168	1.42837	1.26034	1.61879	2.35255e-08	6p22.1
MOG	rs1611284	Wald ratio	-0.862599	0.155863	-1.16809	-0.557108	0.422064	0.31096	0.572863	3.12378e-08	6p22.1
PPP1R11	rs165256	Wald ratio	-1.81884	0.32965	-2.46495	-1.17272	0.162215	0.0850132	0.309523	3.43898e-08	6p22.1
LTB	rs2239704	Wald ratio	-2.56714	0.46679	-3.48205	-1.65223	0.0767546	0.0307443	0.191621	3.80732e-08	6p21.3
CLN3	rs231977	Wald ratio	-1.09038	0.198749	-1.47993	-0.700835	0.336088	0.227653	0.496171	4.10619e-08	16p12.1
VWA7	rs2736426	Wald ratio	-0.734181	0.13396	-0.996742	-0.471621	0.479898	0.36908	0.62399	4.23835e-08	6p21.3
SGF29	rs151231	Wald ratio	-0.639337	0.11714	-0.868932	-0.409743	0.527642	0.419399	0.663821	4.8182e-08	16p11.2
TRIM39	rs2516719	Wald ratio	-1.77936	0.326372	-2.41905	-1.13967	0.168746	0.0890063	0.319925	4.98267e-08	6p22.1
HLA-DMB	rs9296059	Wald ratio	1.65557	0.304928	1.05792	2.25323	5.23609	2.88036	9.51845	5.65437e-08	6p21.3
PRRC2A	rs2844472	Wald ratio	1.25064	0.241439	0.777421	1.72386	3.49259	2.17585	5.60615	2.21954e-07	6p21.3
HLA-DOB	rs10484565, rs4148876, rs9276856	Weighted median	-0.317457	0.0616742	-0.438338	-0.196575	0.727998	0.645108	0.821539	2.64235e-07	6p21.3
NPIPB7	rs151174	Wald ratio	-0.340367	0.068961	-0.47553	-0.205203	0.711509	0.621555	0.814482	7.98861e-07	16p12.1
HSP90AB1	rs10807029	Wald ratio	2.62604	0.542024	1.56367	3.68841	13.8189	4.77632	39.981	1.26695e-06	6p21.1
CSNK2B	rs2857697	Wald ratio	-2.62017	0.542723	-3.68391	-1.55643	0.0727906	0.0251246	0.210887	1.38039e-06	6p21.3
AGPAT1	rs3134950	Wald ratio	-3.04924	0.631877	-4.28772	-1.81077	0.0473947	0.0137362	0.163529	1.39519e-06	6p21.3
BAK1	rs210142	Wald ratio	-0.249747	0.0517731	-0.351222	-0.148272	0.778998	0.703827	0.862197	1.40791e-06	6p21.3
APOBR	rs40834	Wald ratio	-2.69031	0.566461	-3.80058	-1.58005	0.0678596	0.0223579	0.205965	2.04085e-06	16p12.1
AL022393.9	rs1233665	Wald ratio	-0.805407	0.171073	-1.14071	-0.470103	0.446906	0.319592	0.624938	2.5021e-06	6p22.1
SKIV2L	rs1265941, rs444921, rs9276915	Weighted median	-0.431793	0.0919845	-0.612082	-0.251503	0.649344	0.542221	0.777631	2.67668e-06	6p22.1
ERAP2	rs2927608, rs7725881	Inverse variance weighted	0.137047	0.0292092	0.0797966	0.194297	1.14688	1.08307	1.21446	2.70686e-06	5q15
HSD17B8	rs2855448	Wald ratio	-1.41385	0.303243	-2.0082	-0.819492	0.243206	0.134229	0.440655	3.12499e-06	6p21.3
LST1	rs3093553	Wald ratio	1.48011	0.318706	0.85545	2.10478	4.39344	2.35243	8.20526	3.41501e-06	6p21.3

## Sheet: ST_3
Table S3. Sensitivity analyses results
MR heterogeneity test using inverse variance weighted method
exposure	Two-sample MR method	Q	Q_df	Q_pval
MSH5	Inverse variance weighted	2.63208	1	0.104724
ERAP2	Inverse variance weighted	0.0422694	1	0.837107
HLA-DOB	Weighted median	8.86223	2	0.0119012
HLA-DQA2	Weighted median	225.398	2	1.13608e-49
SKIV2L	Weighted median	4.60491	2	0.08023
MR Horizontal pleiotropy test
exposure	Two-sample MR method	egger_intercept	se	pval
HLA-DOB	Weighted median	0.0435543	0.0952751	0.727032
HLA-DQA2	Weighted median	0.220037	0.414798	0.689505
SKIV2L	Weighted median	0.0473299	0.0666186	0.606752
*NOTE : Two exposure genes (HLA-DOB and HLA-DQA2) failed the MR heterogeneity test (Cochran Q p-value < 0.05), suggesting significant heterogeneity, which may indicate pleiotropy or other issues such as invalid instrumental variables. They were removed from all downstream analyses.

## Sheet: ST_4
Table S4. List of JIA-associated SNPs from GWAS catalog.
Note : This included a total of 73 JIA-associated lead SNPs (p ≤ 5 × 10-6) retrieved from the GWAS catalog (https://www.ebi.ac.uk/gwas/; EFO ID : EFO_0002609; accessed on October 28th 2021). We manually removed entries whose "DISEASE/TRAIT" or "STUDY" column is not relevant to JIA risk, such as "Response to methotrexate" and "Genetic architecture distinguishes systemic juvenile idiopathic arthrit…
DATE ADDED TO CATALOG	PUBMEDID	FIRST AUTHOR	DATE	JOURNAL	LINK	STUDY	DISEASE/TRAIT	INITIAL SAMPLE SIZE	REPLICATION SAMPLE SIZE	REGION	CHR_ID	CHR_POS	REPORTED GENE(S)	MAPPED_GENE	UPSTREAM_GENECODE_ID	DOWNSTREAM_GENECODE_ID	UPSTREAM_GENE_DISTANCE (bp)	DOWNSTREAM_GENE_DISTANCE (bp)	STRONGEST SNP-RISK ALLELE	SNP	CONTEXT	RISK ALLELE FREQUENCY	P-VALUE
2018-04-25	23603761	Hinks A	2013-04-21	Nat Genet	www.ncbi.nlm.nih.gov/pubmed/23603761	Dense genotyping of immune-related disease regions identifies 14 new susceptibility loci for juvenile idiopathic arthritis.	Juvenile idiopathic arthritis (oligoarticular or rheumatoid factor-negative polyarticular)	2,816 European ancestry cases, 13,056 European ancestry controls		3q13.33	3	119502217	TIMMDC1, CD80	TIMMDC1					rs11714843-A	rs11714843	intron_variant	0.18	4e-07
2018-04-25	23603761	Hinks A	2013-04-21	Nat Genet	www.ncbi.nlm.nih.gov/pubmed/23603761	Dense genotyping of immune-related disease regions identifies 14 new susceptibility loci for juvenile idiopathic arthritis.	Juvenile idiopathic arthritis (oligoarticular or rheumatoid factor-negative polyarticular)	2,816 European ancestry cases, 13,056 European ancestry controls		7p15.1	7	28147725	JAZF1	JAZF1					rs73300638-C	rs73300638	intron_variant	0.11	1e-07
2018-04-25	23603761	Hinks A	2013-04-21	Nat Genet	www.ncbi.nlm.nih.gov/pubmed/23603761	Dense genotyping of immune-related disease regions identifies 14 new susceptibility loci for juvenile idiopathic arthritis.	Juvenile idiopathic arthritis (oligoarticular or rheumatoid factor-negative polyarticular)	2,816 European ancestry cases, 13,056 European ancestry controls		2q11.2	2	100217755	AFF3, LONRF2	LINC01104					rs10194635-T	rs10194635	intron_variant	0.39	8e-07
2018-04-25	23603761	Hinks A	2013-04-21	Nat Genet	www.ncbi.nlm.nih.gov/pubmed/23603761	Dense genotyping of immune-related disease regions identifies 14 new susceptibility loci for juvenile idiopathic arthritis.	Juvenile idiopathic arthritis (oligoarticular or rheumatoid factor-negative polyarticular)	2,816 European ancestry cases, 13,056 European ancestry controls		2q32.2	2	191009521	STAT4	STAT1					rs45539732-?	rs45539732	intron_variant	NR	7e-08
2018-04-25	23603761	Hinks A	2013-04-21	Nat Genet	www.ncbi.nlm.nih.gov/pubmed/23603761	Dense genotyping of immune-related disease regions identifies 14 new susceptibility loci for juvenile idiopathic arthritis.	Juvenile idiopathic arthritis (oligoarticular or rheumatoid factor-negative polyarticular)	2,816 European ancestry cases, 13,056 European ancestry controls		18p11.21	18	12885121	PTPN2	PTPN2					rs149850873-?	rs149850873	intron_variant	NR	5e-07
2018-04-25	23603761	Hinks A	2013-04-21	Nat Genet	www.ncbi.nlm.nih.gov/pubmed/23603761	Dense genotyping of immune-related disease regions identifies 14 new susceptibility loci for juvenile idiopathic arthritis.	Juvenile idiopathic arthritis (oligoarticular or rheumatoid factor-negative polyarticular)	2,816 European ancestry cases, 13,056 European ancestry controls		10p15.1	10	6053447	IL2RA	IL2RA					rs2476491-?	rs2476491	intron_variant	NR	1e-06
2018-04-25	23603761	Hinks A	2013-04-21	Nat Genet	www.ncbi.nlm.nih.gov/pubmed/23603761	Dense genotyping of immune-related disease regions identifies 14 new susceptibility loci for juvenile idiopathic arthritis.	Juvenile idiopathic arthritis (oligoarticular or rheumatoid factor-negative polyarticular)	2,816 European ancestry cases, 13,056 European ancestry controls		1p13.2	1	113761186	PTPN22	PHTF1 - RSBN1	ENSG00000116793	ENSG00000081019	1697	646	rs6679677-A	rs6679677	intergenic_variant	0.1	3e-25
2018-04-25	23603761	Hinks A	2013-04-21	Nat Genet	www.ncbi.nlm.nih.gov/pubmed/23603761	Dense genotyping of immune-related disease regions identifies 14 new susceptibility loci for juvenile idiopathic arthritis.	Juvenile idiopathic arthritis (oligoarticular or rheumatoid factor-negative polyarticular)	2,816 European ancestry cases, 13,056 European ancestry controls		2q32.3	2	191108308	STAT4	STAT4					rs10174238-G	rs10174238	intron_variant	0.23	1e-13
2018-04-25	23603761	Hinks A	2013-04-21	Nat Genet	www.ncbi.nlm.nih.gov/pubmed/23603761	Dense genotyping of immune-related disease regions identifies 14 new susceptibility loci for juvenile idiopathic arthritis.	Juvenile idiopathic arthritis (oligoarticular or rheumatoid factor-negative polyarticular)	2,816 European ancestry cases, 13,056 European ancestry controls		18p11.21	18	12782449	PTPN2	LINC01882 - PTPN2	ENSG00000260302	ENSG00000175354	6309	3029	rs2847293-A	rs2847293	intergenic_variant	0.17	1e-12
2018-04-25	23603761	Hinks A	2013-04-21	Nat Genet	www.ncbi.nlm.nih.gov/pubmed/23603761	Dense genotyping of immune-related disease regions identifies 14 new susceptibility loci for juvenile idiopathic arthritis.	Juvenile idiopathic arthritis (oligoarticular or rheumatoid factor-negative polyarticular)	2,816 European ancestry cases, 13,056 European ancestry controls		5q11.2	5	56146422	ANKRD55	ANKRD55					rs10213692-?	rs10213692	intron_variant	0.75	3e-11
2018-04-25	23603761	Hinks A	2013-04-21	Nat Genet	www.ncbi.nlm.nih.gov/pubmed/23603761	Dense genotyping of immune-related disease regions identifies 14 new susceptibility loci for juvenile idiopathic arthritis.	Juvenile idiopathic arthritis (oligoarticular or rheumatoid factor-negative polyarticular)	2,816 European ancestry cases, 13,056 European ancestry controls		4q27	4	122466445	IL2, IL21	IL2 - IL21	ENSG00000109471	ENSG00000138684	9720	143663	rs1479924-?	rs1479924	intergenic_variant	0.71	6e-11
2018-04-25	23603761	Hinks A	2013-04-21	Nat Genet	www.ncbi.nlm.nih.gov/pubmed/23603761	Dense genotyping of immune-related disease regions identifies 14 new susceptibility loci for juvenile idiopathic arthritis.	Juvenile idiopathic arthritis (oligoarticular or rheumatoid factor-negative polyarticular)	2,816 European ancestry cases, 13,056 European ancestry controls		19p13.2	19	10352442	TYK2	TYK2					rs34536443-?	rs34536443	missense_variant	0.95	1e-10
2018-04-25	23603761	Hinks A	2013-04-21	Nat Genet	www.ncbi.nlm.nih.gov/pubmed/23603761	Dense genotyping of immune-related disease regions identifies 14 new susceptibility loci for juvenile idiopathic arthritis.	Juvenile idiopathic arthritis (oligoarticular or rheumatoid factor-negative polyarticular)	2,816 European ancestry cases, 13,056 European ancestry controls		10p15.1	10	6047878	IL2RA	IL2RA					rs7909519-?	rs7909519	intron_variant	0.89	8e-10
2018-04-25	23603761	Hinks A	2013-04-21	Nat Genet	www.ncbi.nlm.nih.gov/pubmed/23603761	Dense genotyping of immune-related disease regions identifies 14 new susceptibility loci for juvenile idiopathic arthritis.	Juvenile idiopathic arthritis (oligoarticular or rheumatoid factor-negative polyarticular)	2,816 European ancestry cases, 13,056 European ancestry controls		12q24.12	12	111494996	SH2B3, ATXN2	ATXN2					rs7137828-C	rs7137828	intron_variant	0.49	2e-09
2018-04-25	23603761	Hinks A	2013-04-21	Nat Genet	www.ncbi.nlm.nih.gov/pubmed/23603761	Dense genotyping of immune-related disease regions identifies 14 new susceptibility loci for juvenile idiopathic arthritis.	Juvenile idiopathic arthritis (oligoarticular or rheumatoid factor-negative polyarticular)	2,816 European ancestry cases, 13,056 European ancestry controls		5q15	5	97021474	ERAP2, LNPEP	LNPEP					rs27293-A	rs27293	intron_variant	0.44	7e-09
2018-04-25	23603761	Hinks A	2013-04-21	Nat Genet	www.ncbi.nlm.nih.gov/pubmed/23603761	Dense genotyping of immune-related disease regions identifies 14 new susceptibility loci for juvenile idiopathic arthritis.	Juvenile idiopathic arthritis (oligoarticular or rheumatoid factor-negative polyarticular)	2,816 European ancestry cases, 13,056 European ancestry controls		22q11.21	22	21568615	UBE2L3	UBE2L3					rs2266959-A	rs2266959	intron_variant	0.19	6e-09
2018-04-25	23603761	Hinks A	2013-04-21	Nat Genet	www.ncbi.nlm.nih.gov/pubmed/23603761	Dense genotyping of immune-related disease regions identifies 14 new susceptibility loci for juvenile idiopathic arthritis.	Juvenile idiopathic arthritis (oligoarticular or rheumatoid factor-negative polyarticular)	2,816 European ancestry cases, 13,056 European ancestry controls		5q31.1	5	132461855	IRF1, C5orf56	IRF1-AS1, IRF1					rs6894249-?	rs6894249	non_coding_transcript_exon_variant	0.61	1e-09
2018-04-25	23603761	Hinks A	2013-04-21	Nat Genet	www.ncbi.nlm.nih.gov/pubmed/23603761	Dense genotyping of immune-related disease regions identifies 14 new susceptibility loci for juvenile idiopathic arthritis.	Juvenile idiopathic arthritis (oligoarticular or rheumatoid factor-negative polyarticular)	2,816 European ancestry cases, 13,056 European ancestry controls		21q22.12	21	35340290	RUNX1	RUNX1					rs8129030-?	rs8129030	intron_variant	0.63	5e-09
2018-04-25	23603761	Hinks A	2013-04-21	Nat Genet	www.ncbi.nlm.nih.gov/pubmed/23603761	Dense genotyping of immune-related disease regions identifies 14 new susceptibility loci for juvenile idiopathic arthritis.	Juvenile idiopathic arthritis (oligoarticular or rheumatoid factor-negative polyarticular)	2,816 European ancestry cases, 13,056 European ancestry controls		22q12.3	22	37137994	IL2RB	IL2RB					rs2284033-?	rs2284033	intron_variant	0.56	2e-08
2018-04-25	23603761	Hinks A	2013-04-21	Nat Genet	www.ncbi.nlm.nih.gov/pubmed/23603761	Dense genotyping of immune-related disease regions identifies 14 new susceptibility loci for juvenile idiopathic arthritis.	Juvenile idiopathic arthritis (oligoarticular or rheumatoid factor-negative polyarticular)	2,816 European ancestry cases, 13,056 European ancestry controls		1q21.3	1	154406893	ATP8B2, IL6R	IL6R					rs72698115-C	rs72698115	intron_variant	0.1	1e-08
2018-04-25	23603761	Hinks A	2013-04-21	Nat Genet	www.ncbi.nlm.nih.gov/pubmed/23603761	Dense genotyping of immune-related disease regions identifies 14 new susceptibility loci for juvenile idiopathic arthritis.	Juvenile idiopathic arthritis (oligoarticular or rheumatoid factor-negative polyarticular)	2,816 European ancestry cases, 13,056 European ancestry controls		10q23.31	10	89002619	FAS	FAS					rs7069750-C	rs7069750	non_coding_transcript_exon_variant	0.44	3e-08
2018-04-25	23603761	Hinks A	2013-04-21	Nat Genet	www.ncbi.nlm.nih.gov/pubmed/23603761	Dense genotyping of immune-related disease regions identifies 14 new susceptibility loci for juvenile idiopathic arthritis.	Juvenile idiopathic arthritis (oligoarticular or rheumatoid factor-negative polyarticular)	2,816 European ancestry cases, 13,056 European ancestry controls		14q24.1	14	68793871	ZFP36L1	ZFP36L1					rs3825568-?	rs3825568	5_prime_UTR_variant	0.56	1e-08
2018-04-25	23603761	Hinks A	2013-04-21	Nat Genet	www.ncbi.nlm.nih.gov/pubmed/23603761	Dense genotyping of immune-related disease regions identifies 14 new susceptibility loci for juvenile idiopathic arthritis.	Juvenile idiopathic arthritis (oligoarticular or rheumatoid factor-negative polyarticular)	2,816 European ancestry cases, 13,056 European ancestry controls		12p13.31	12	6384185	LTBR	LTBR					rs10849448-A	rs10849448	5_prime_UTR_variant	0.24	5e-09
2018-04-25	23603761	Hinks A	2013-04-21	Nat Genet	www.ncbi.nlm.nih.gov/pubmed/23603761	Dense genotyping of immune-related disease regions identifies 14 new susceptibility loci for juvenile idiopathic arthritis.	Juvenile idiopathic arthritis (oligoarticular or rheumatoid factor-negative polyarticular)	2,816 European ancestry cases, 13,056 European ancestry controls		7p15.3	7	22769871	IL6	MTCYBP42 - TOMM7	ENSG00000228803	ENSG00000196683	21067	42757	rs6946509-T	rs6946509	intergenic_variant	0.45	3e-08
2018-04-25	23603761	Hinks A	2013-04-21	Nat Genet	www.ncbi.nlm.nih.gov/pubmed/23603761	Dense genotyping of immune-related disease regions identifies 14 new susceptibility loci for juvenile idiopathic arthritis.	Juvenile idiopathic arthritis (oligoarticular or rheumatoid factor-negative polyarticular)	2,816 European ancestry cases, 13,056 European ancestry controls		13q14.11	13	39781776	COG6	COG6					rs9532434-?	rs9532434	intron_variant	0.64	5e-08
2018-04-25	23603761	Hinks A	2013-04-21	Nat Genet	www.ncbi.nlm.nih.gov/pubmed/23603761	Dense genotyping of immune-related disease regions identifies 14 new susceptibility loci for juvenile idiopathic arthritis.	Juvenile idiopathic arthritis (oligoarticular or rheumatoid factor-negative polyarticular)	2,816 European ancestry cases, 13,056 European ancestry controls		13q14.11	13	42481900	Intergenic	LINC02341					rs34132030-A	rs34132030	intron_variant	0.32	2e-07
2018-04-25	23603761	Hinks A	2013-04-21	Nat Genet	www.ncbi.nlm.nih.gov/pubmed/23603761	Dense genotyping of immune-related disease regions identifies 14 new susceptibility loci for juvenile idiopathic arthritis.	Juvenile idiopathic arthritis (oligoarticular or rheumatoid factor-negative polyarticular)	2,816 European ancestry cases, 13,056 European ancestry controls		3p21.31	3	46212159	CCR1, CCR3	CCR3					rs79893749-?	rs79893749	intron_variant	0.85	2e-07
2018-04-25	23603761	Hinks A	2013-04-21	Nat Genet	www.ncbi.nlm.nih.gov/pubmed/23603761	Dense genotyping of immune-related disease regions identifies 14 new susceptibility loci for juvenile idiopathic arthritis.	Juvenile idiopathic arthritis (oligoarticular or rheumatoid factor-negative polyarticular)	2,816 European ancestry cases, 13,056 European ancestry controls		11p13	11	36322143	PRR5L	PRR5L					rs7127214-?	rs7127214	intron_variant	0.65	2e-08
2018-04-25	23603761	Hinks A	2013-04-21	Nat Genet	www.ncbi.nlm.nih.gov/pubmed/23603761	Dense genotyping of immune-related disease regions identifies 14 new susceptibility loci for juvenile idiopathic arthritis.	Juvenile idiopathic arthritis (oligoarticular or rheumatoid factor-negative polyarticular)	2,816 European ancestry cases, 13,056 European ancestry controls		16p13.13	16	11377557	PRM1, RMI2	RMI2					rs11074967-?	rs11074967	intron_variant	0.58	2e-07
2018-04-25	23603761	Hinks A	2013-04-21	Nat Genet	www.ncbi.nlm.nih.gov/pubmed/23603761	Dense genotyping of immune-related disease regions identifies 14 new susceptibility loci for juvenile idiopathic arthritis.	Juvenile idiopathic arthritis (oligoarticular or rheumatoid factor-negative polyarticular)	2,816 European ancestry cases, 13,056 European ancestry controls		1p36.11	1	24870664	RUNX3	CLIC4 - RUNX3	ENSG00000169504	ENSG00000020633	26343	28847	rs4648881-G	rs4648881	intergenic_variant	0.49	5e-07
2018-04-25	23603761	Hinks A	2013-04-21	Nat Genet	www.ncbi.nlm.nih.gov/pubmed/23603761	Dense genotyping of immune-related disease regions identifies 14 new susceptibility loci for juvenile idiopathic arthritis.	Juvenile idiopathic arthritis (oligoarticular or rheumatoid factor-negative polyarticular)	2,816 European ancestry cases, 13,056 European ancestry controls		6p21.32	6	32690139	HLA-DQA2, HLA-DQB1	HLA-DQB1 - MTCO3P1	ENSG00000231286	ENSG00000237145	21756	15985	rs7775055-G	rs7775055	TF_binding_site_variant	0.02	3e-174
2021-07-27	34101054	Nikopensius T	2021-06-08	Clin Rheumatol	www.ncbi.nlm.nih.gov/pubmed/34101054	Association analysis of juvenile idiopathic arthritis genetic susceptibility factors in Estonian patients.	Arthritis (oligoarticular juvenile idiopathic)	Up to 263 Estonian ancestry cases, up to 6,956 Estonian ancestry controls		1p31.3	1	61624865	NFIA	NA - TM2D1		ENSG00000162604		56181	rs1436238830-?	rs1436238830	intergenic_variant	NR	5e-06
2021-07-27	34101054	Nikopensius T	2021-06-08	Clin Rheumatol	www.ncbi.nlm.nih.gov/pubmed/34101054	Association analysis of juvenile idiopathic arthritis genetic susceptibility factors in Estonian patients.	Arthritis (juvenile idiopathic)	263 Estonian ancestry cases, 6,956 Estonian ancestry controls		2p22.3	2	32992970	LTBP1	LTBP1					rs219158-?	rs219158	intron_variant	NR	9e-06
2021-07-27	34101054	Nikopensius T	2021-06-08	Clin Rheumatol	www.ncbi.nlm.nih.gov/pubmed/34101054	Association analysis of juvenile idiopathic arthritis genetic susceptibility factors in Estonian patients.	Arthritis (juvenile idiopathic)	263 Estonian ancestry cases, 6,956 Estonian ancestry controls		10q21.1	10	52003161	PRKG1	PRKG1					rs2454539-?	rs2454539	intron_variant	NR	3e-06
2009-02-27	19116933	Hinks A	2009-01-01	Arthritis Rheum	www.ncbi.nlm.nih.gov/pubmed/19116933	Identification of a novel susceptibility locus for juvenile idiopathic arthritis by genome-wide association analysis.	Arthritis (juvenile idiopathic)	279 European ancestry cases, 184 European ancestry controls	up to 654 European ancestry cases, 2,024 European ancestry controls	1p12	1	117208743	VTCN1	VTCN1					rs12046117-?	rs12046117	intron_variant	0.09	1e-06
2008-07-11	18576341	Behrens EM	2008-06-24	Arthritis Rheum	www.ncbi.nlm.nih.gov/pubmed/18576341	Association of the TRAF1-C5 locus on chromosome 9 with juvenile idiopathic arthritis.	Arthritis (juvenile idiopathic)	67 European ancestry cases, 1,952 European ancestry controls, 63 cases		6p21.32	6	32353777	HLA-DRB1	TSBP1-AS1, TSBP1-AS1, TSBP1-AS1, TSBP1-AS1, TSBP1-AS1, TSBP1-AS1, TSBP1-AS1, TSBP1, TSBP1, TSBP1, TSBP1, TSBP1, TSBP1, TSBP1					rs2395148-?	rs2395148	intron_variant	NR	2e-10
2020-11-12	33106285	Lopez-Isac E	2020-10-26	Ann Rheum Dis	www.ncbi.nlm.nih.gov/pubmed/33106285	Combined genetic analysis of juvenile idiopathic arthritis clinical subtypes identifies novel risk loci, target genes and key regulatory mechanisms.	Arthritis (juvenile idiopathic)	3,305 European ancestry cases, 9,196 European ancestry controls	2,751 European ancestry cases, 15,886 European ancestry controls	1p13.2	1	113761186	RSBN, PTPN22	PHTF1 - RSBN1	ENSG00000116793	ENSG00000081019	1697	646	rs6679677-A	rs6679677	intergenic_variant	NR	7e-30
2020-11-12	33106285	Lopez-Isac E	2020-10-26	Ann Rheum Dis	www.ncbi.nlm.nih.gov/pubmed/33106285	Combined genetic analysis of juvenile idiopathic arthritis clinical subtypes identifies novel risk loci, target genes and key regulatory mechanisms.	Arthritis (juvenile idiopathic)	3,305 European ancestry cases, 9,196 European ancestry controls	2,751 European ancestry cases, 15,886 European ancestry controls	1q21.3	1	154339435	ATP8B2	ATP8B2					rs2481065-G	rs2481065	intron_variant	NR	4e-13
2020-11-12	33106285	Lopez-Isac E	2020-10-26	Ann Rheum Dis	www.ncbi.nlm.nih.gov/pubmed/33106285	Combined genetic analysis of juvenile idiopathic arthritis clinical subtypes identifies novel risk loci, target genes and key regulatory mechanisms.	Arthritis (juvenile idiopathic)	3,305 European ancestry cases, 9,196 European ancestry controls	2,751 European ancestry cases, 15,886 European ancestry controls	1p36.11	1	24963243	RUNX3	RUNX3					rs72657048-G	rs72657048	intron_variant	NR	4e-07
2020-11-12	33106285	Lopez-Isac E	2020-10-26	Ann Rheum Dis	www.ncbi.nlm.nih.gov/pubmed/33106285	Combined genetic analysis of juvenile idiopathic arthritis clinical subtypes identifies novel risk loci, target genes and key regulatory mechanisms.	Arthritis (juvenile idiopathic)	3,305 European ancestry cases, 9,196 European ancestry controls	2,751 European ancestry cases, 15,886 European ancestry controls	2q32.2	2	191079016	STAT4	STAT4					rs11889341-T	rs11889341	intron_variant	NR	2e-19
2020-11-12	33106285	Lopez-Isac E	2020-10-26	Ann Rheum Dis	www.ncbi.nlm.nih.gov/pubmed/33106285	Combined genetic analysis of juvenile idiopathic arthritis clinical subtypes identifies novel risk loci, target genes and key regulatory mechanisms.	Arthritis (juvenile idiopathic)	3,305 European ancestry cases, 9,196 European ancestry controls	2,751 European ancestry cases, 15,886 European ancestry controls	2q32.2	2	190398036	INPP1, MFSD6	INPP1 - MFSD6	ENSG00000151689	ENSG00000151690	26371	10319	rs6434390-G	rs6434390	intergenic_variant	NR	1e-09
2020-11-12	33106285	Lopez-Isac E	2020-10-26	Ann Rheum Dis	www.ncbi.nlm.nih.gov/pubmed/33106285	Combined genetic analysis of juvenile idiopathic arthritis clinical subtypes identifies novel risk loci, target genes and key regulatory mechanisms.	Arthritis (juvenile idiopathic)	3,305 European ancestry cases, 9,196 European ancestry controls	2,751 European ancestry cases, 15,886 European ancestry controls	2q11.2	2	100143015	AFF3	AFF3					rs11692867-G	rs11692867	intron_variant	NR	9e-08
2020-11-12	33106285	Lopez-Isac E	2020-10-26	Ann Rheum Dis	www.ncbi.nlm.nih.gov/pubmed/33106285	Combined genetic analysis of juvenile idiopathic arthritis clinical subtypes identifies novel risk loci, target genes and key regulatory mechanisms.	Arthritis (juvenile idiopathic)	3,305 European ancestry cases, 9,196 European ancestry controls	2,751 European ancestry cases, 15,886 European ancestry controls	3p21.31	3	46236086	CCR1, CCR3	CCR3					rs79815064-A	rs79815064	intron_variant	NR	3e-11
2020-11-12	33106285	Lopez-Isac E	2020-10-26	Ann Rheum Dis	www.ncbi.nlm.nih.gov/pubmed/33106285	Combined genetic analysis of juvenile idiopathic arthritis clinical subtypes identifies novel risk loci, target genes and key regulatory mechanisms.	Arthritis (juvenile idiopathic)	3,305 European ancestry cases, 9,196 European ancestry controls	2,751 European ancestry cases, 15,886 European ancestry controls	3p13	3	71151006	FOXP1	FOXP1					rs7647909-G	rs7647909	intron_variant	NR	2e-09
2020-11-12	33106285	Lopez-Isac E	2020-10-26	Ann Rheum Dis	www.ncbi.nlm.nih.gov/pubmed/33106285	Combined genetic analysis of juvenile idiopathic arthritis clinical subtypes identifies novel risk loci, target genes and key regulatory mechanisms.	Arthritis (juvenile idiopathic)	3,305 European ancestry cases, 9,196 European ancestry controls	2,751 European ancestry cases, 15,886 European ancestry controls	5q15	5	96893521	ERAP2	ERAP2					rs4869314-G	rs4869314	intron_variant	NR	3e-09
2020-11-12	33106285	Lopez-Isac E	2020-10-26	Ann Rheum Dis	www.ncbi.nlm.nih.gov/pubmed/33106285	Combined genetic analysis of juvenile idiopathic arthritis clinical subtypes identifies novel risk loci, target genes and key regulatory mechanisms.	Arthritis (juvenile idiopathic)	3,305 European ancestry cases, 9,196 European ancestry controls	2,751 European ancestry cases, 15,886 European ancestry controls	6q23.3	6	135356064	AHI1	AHI1					rs2614258-A	rs2614258	intron_variant	NR	9e-12
2020-11-12	33106285	Lopez-Isac E	2020-10-26	Ann Rheum Dis	www.ncbi.nlm.nih.gov/pubmed/33106285	Combined genetic analysis of juvenile idiopathic arthritis clinical subtypes identifies novel risk loci, target genes and key regulatory mechanisms.	Arthritis (juvenile idiopathic)	3,305 European ancestry cases, 9,196 European ancestry controls	2,751 European ancestry cases, 15,886 European ancestry controls	9q32	9	114866248	TNFSF8	DELEC1					rs7043505-A	rs7043505	intron_variant	NR	8e-08
2020-11-12	33106285	Lopez-Isac E	2020-10-26	Ann Rheum Dis	www.ncbi.nlm.nih.gov/pubmed/33106285	Combined genetic analysis of juvenile idiopathic arthritis clinical subtypes identifies novel risk loci, target genes and key regulatory mechanisms.	Arthritis (juvenile idiopathic)	3,305 European ancestry cases, 9,196 European ancestry controls	2,751 European ancestry cases, 15,886 European ancestry controls	10p15.1	10	6056986	IL2RA	IL2RA					rs706778-T	rs706778	intron_variant	NR	1e-12
2020-11-12	33106285	Lopez-Isac E	2020-10-26	Ann Rheum Dis	www.ncbi.nlm.nih.gov/pubmed/33106285	Combined genetic analysis of juvenile idiopathic arthritis clinical subtypes identifies novel risk loci, target genes and key regulatory mechanisms.	Arthritis (juvenile idiopathic)	3,305 European ancestry cases, 9,196 European ancestry controls	2,751 European ancestry cases, 15,886 European ancestry controls	10q23.31	10	88982292	ACTA2	ACTA2					rs7082720-T	rs7082720	intron_variant	NR	1e-07
2020-11-12	33106285	Lopez-Isac E	2020-10-26	Ann Rheum Dis	www.ncbi.nlm.nih.gov/pubmed/33106285	Combined genetic analysis of juvenile idiopathic arthritis clinical subtypes identifies novel risk loci, target genes and key regulatory mechanisms.	Arthritis (juvenile idiopathic)	3,305 European ancestry cases, 9,196 European ancestry controls	2,751 European ancestry cases, 15,886 European ancestry controls	12q24.12	12	111466567	ATXN2	ATXN2					rs4766578-T	rs4766578	intron_variant	NR	2e-13
2020-11-12	33106285	Lopez-Isac E	2020-10-26	Ann Rheum Dis	www.ncbi.nlm.nih.gov/pubmed/33106285	Combined genetic analysis of juvenile idiopathic arthritis clinical subtypes identifies novel risk loci, target genes and key regulatory mechanisms.	Arthritis (juvenile idiopathic)	3,305 European ancestry cases, 9,196 European ancestry controls	2,751 European ancestry cases, 15,886 European ancestry controls	13q14.11	13	42457891	TNFSF11	LINC02341					rs12430303-C	rs12430303	intron_variant	NR	2e-09
2020-11-12	33106285	Lopez-Isac E	2020-10-26	Ann Rheum Dis	www.ncbi.nlm.nih.gov/pubmed/33106285	Combined genetic analysis of juvenile idiopathic arthritis clinical subtypes identifies novel risk loci, target genes and key regulatory mechanisms.	Arthritis (juvenile idiopathic)	3,305 European ancestry cases, 9,196 European ancestry controls	2,751 European ancestry cases, 15,886 European ancestry controls	14q24.1	14	68792945	ZFP36L1	ZFP36L1					rs1051533-A	rs1051533	synonymous_variant	NR	1e-08
2020-11-12	33106285	Lopez-Isac E	2020-10-26	Ann Rheum Dis	www.ncbi.nlm.nih.gov/pubmed/33106285	Combined genetic analysis of juvenile idiopathic arthritis clinical subtypes identifies novel risk loci, target genes and key regulatory mechanisms.	Arthritis (juvenile idiopathic)	3,305 European ancestry cases, 9,196 European ancestry controls	2,751 European ancestry cases, 15,886 European ancestry controls	18p11.21	18	12770852	RP11-973H7.1	LINC01882					rs9960807-G	rs9960807	intron_variant	NR	3e-14
2012-03-30	22354554	Thompson SD	2012-02-21	Arthritis Rheum	www.ncbi.nlm.nih.gov/pubmed/22354554	Genome-wide association analysis of juvenile idiopathic arthritis identifies a new susceptibility locus at chromosomal region 3q13.	Arthritis (juvenile idiopathic)	814 European ancestry cases, 658 European ancestry controls, 2,400 controls	1,744 European ancestry cases, 7,010 European ancestry controls	10q21.3	10	63246696	JMJD1C	JMJD1C					rs6479891-T	rs6479891	intron_variant	0.14	2e-07
2012-03-30	22354554	Thompson SD	2012-02-21	Arthritis Rheum	www.ncbi.nlm.nih.gov/pubmed/22354554	Genome-wide association analysis of juvenile idiopathic arthritis identifies a new susceptibility locus at chromosomal region 3q13.	Arthritis (juvenile idiopathic)	814 European ancestry cases, 658 European ancestry controls, 2,400 controls	1,744 European ancestry cases, 7,010 European ancestry controls	3q13.33	3	119508400	C3orf1	TIMMDC1					rs4688011-T	rs4688011	intron_variant	0.19	1e-07
2012-03-30	22354554	Thompson SD	2012-02-21	Arthritis Rheum	www.ncbi.nlm.nih.gov/pubmed/22354554	Genome-wide association analysis of juvenile idiopathic arthritis identifies a new susceptibility locus at chromosomal region 3q13.	Arthritis (juvenile idiopathic)	814 European ancestry cases, 658 European ancestry controls, 2,400 controls	1,744 European ancestry cases, 7,010 European ancestry controls	10q21.3	10	63555637	REEP3	REEP3					rs12411988-C	rs12411988	intron_variant	0.13	3e-07
2012-03-30	22354554	Thompson SD	2012-02-21	Arthritis Rheum	www.ncbi.nlm.nih.gov/pubmed/22354554	Genome-wide association analysis of juvenile idiopathic arthritis identifies a new susceptibility locus at chromosomal region 3q13.	Arthritis (juvenile idiopathic)	814 European ancestry cases, 658 European ancestry controls, 2,400 controls	1,744 European ancestry cases, 7,010 European ancestry controls	15q26.3	15	98529676	FAM169B, IGF1R	FAM169B					rs12719740-T	rs12719740	intron_variant	0.18	7e-07
2016-12-07	27005825	Finkel TH	2016-03-22	BMC Med Genet	www.ncbi.nlm.nih.gov/pubmed/27005825	Variants in CXCR4 associate with juvenile idiopathic arthritis susceptibility.	Arthritis (juvenile idiopathic)	388 European ancestry cases, 2,500 European ancestry controls	778 European ancestry cases, 7,000 European ancestry controls	2q22.1	2	136149600	CXCR4	CXCR4 - HNRNPKP2	ENSG00000121966	ENSG00000227347	31451	49514	rs953387-T	rs953387	intergenic_variant	0.74	3e-14
2021-10-20	34594039	Sakaue S	2021-09-30	Nat Genet	www.ncbi.nlm.nih.gov/pubmed/34594039	A cross-population atlas of genetic associations for 220 human phenotypes.	Juvenile rheumatoid arthritis	216 European ancestry cases, 409,001 European ancestry controls, 110 East Asian ancestry cases, 173,268 East Asian ancestry controls		6p21.32	6	32659207		HLA-DQA1 - HLA-DQB1	ENSG00000196735	ENSG00000231286	12145	260	rs4713573-?	rs4713573	intergenic_variant	NR	3e-09
2016-08-31	26301688	Li YR	2015-08-24	Nat Med	www.ncbi.nlm.nih.gov/pubmed/26301688	Meta-analysis of shared genetic architecture across ten pediatric autoimmune diseases.	Pediatric autoimmune diseases	97 European ancestry thyroiditis cases, 107 European ancestry ankylosing spondylitis cases, 100 European ancestry psoriasis cases, 173 European ancestry celiac disease cases, 254 European ancestry systemic lupus erythematosus cases, 308 European ancestry common variable inmunodeficiency cases, 865 European ancestry ulcerative colitis cases, 1,086 European ancestry Type 1 diabetes cases, 1,123 Eur…		1p13.2	1	113761186	PTPN22	PHTF1 - RSBN1	ENSG00000116793	ENSG00000081019	1697	646	rs6679677-A	rs6679677	intergenic_variant	0.09	8e-11
2016-08-31	26301688	Li YR	2015-08-24	Nat Med	www.ncbi.nlm.nih.gov/pubmed/26301688	Meta-analysis of shared genetic architecture across ten pediatric autoimmune diseases.	Pediatric autoimmune diseases	97 European ancestry thyroiditis cases, 107 European ancestry ankylosing spondylitis cases, 100 European ancestry psoriasis cases, 173 European ancestry celiac disease cases, 254 European ancestry systemic lupus erythematosus cases, 308 European ancestry common variable inmunodeficiency cases, 865 European ancestry ulcerative colitis cases, 1,086 European ancestry Type 1 diabetes cases, 1,123 Eur…		4q27	4	122639784	IL21	IL21-AS1					rs62324212-A	rs62324212	intron_variant	0.42	3e-08
2016-08-31	26301688	Li YR	2015-08-24	Nat Med	www.ncbi.nlm.nih.gov/pubmed/26301688	Meta-analysis of shared genetic architecture across ten pediatric autoimmune diseases.	Pediatric autoimmune diseases	97 European ancestry thyroiditis cases, 107 European ancestry ankylosing spondylitis cases, 100 European ancestry psoriasis cases, 173 European ancestry celiac disease cases, 254 European ancestry systemic lupus erythematosus cases, 308 European ancestry common variable inmunodeficiency cases, 865 European ancestry ulcerative colitis cases, 1,086 European ancestry Type 1 diabetes cases, 1,123 Eur…		5q11.2	5	56148856	ANKRD55	ANKRD55					rs7731626-A	rs7731626	intron_variant	0.39	1e-10
2016-08-31	26301688	Li YR	2015-08-24	Nat Med	www.ncbi.nlm.nih.gov/pubmed/26301688	Meta-analysis of shared genetic architecture across ten pediatric autoimmune diseases.	Pediatric autoimmune diseases	97 European ancestry thyroiditis cases, 107 European ancestry ankylosing spondylitis cases, 100 European ancestry psoriasis cases, 173 European ancestry celiac disease cases, 254 European ancestry systemic lupus erythematosus cases, 308 European ancestry common variable inmunodeficiency cases, 865 European ancestry ulcerative colitis cases, 1,086 European ancestry Type 1 diabetes cases, 1,123 Eur…		5q15	5	96888176	ERAP2	ERAP2					rs4869313-T	rs4869313	intron_variant	0.42	9e-08
2016-08-31	26301688	Li YR	2015-08-24	Nat Med	www.ncbi.nlm.nih.gov/pubmed/26301688	Meta-analysis of shared genetic architecture across ten pediatric autoimmune diseases.	Pediatric autoimmune diseases	97 European ancestry thyroiditis cases, 107 European ancestry ankylosing spondylitis cases, 100 European ancestry psoriasis cases, 173 European ancestry celiac disease cases, 254 European ancestry systemic lupus erythematosus cases, 308 European ancestry common variable inmunodeficiency cases, 865 European ancestry ulcerative colitis cases, 1,086 European ancestry Type 1 diabetes cases, 1,123 Eur…		10p15.1	10	6056986	IL2RA	IL2RA					rs706778-T	rs706778	intron_variant	0.41	6e-09
2016-08-31	26301688	Li YR	2015-08-24	Nat Med	www.ncbi.nlm.nih.gov/pubmed/26301688	Meta-analysis of shared genetic architecture across ten pediatric autoimmune diseases.	Pediatric autoimmune diseases	97 European ancestry thyroiditis cases, 107 European ancestry ankylosing spondylitis cases, 100 European ancestry psoriasis cases, 173 European ancestry celiac disease cases, 254 European ancestry systemic lupus erythematosus cases, 308 European ancestry common variable inmunodeficiency cases, 865 European ancestry ulcerative colitis cases, 1,086 European ancestry Type 1 diabetes cases, 1,123 Eur…		17q21.1	17	39883866	IKZF3	ZPBP2 - GSDMB	ENSG00000186075	ENSG00000073605	5970	20729	rs12232497-C	rs12232497	intergenic_variant	0.45	3e-07
2016-08-31	26301688	Li YR	2015-08-24	Nat Med	www.ncbi.nlm.nih.gov/pubmed/26301688	Meta-analysis of shared genetic architecture across ten pediatric autoimmune diseases.	Pediatric autoimmune diseases	97 European ancestry thyroiditis cases, 107 European ancestry ankylosing spondylitis cases, 100 European ancestry psoriasis cases, 173 European ancestry celiac disease cases, 254 European ancestry systemic lupus erythematosus cases, 308 European ancestry common variable inmunodeficiency cases, 865 European ancestry ulcerative colitis cases, 1,086 European ancestry Type 1 diabetes cases, 1,123 Eur…		19p13.2	19	10476920	TYK2	PDE4A - KEAP1	ENSG00000065989	ENSG00000079999	7290	9205	rs62131887-T	rs62131887	intergenic_variant	0.28	4e-07
2016-08-31	26301688	Li YR	2015-08-24	Nat Med	www.ncbi.nlm.nih.gov/pubmed/26301688	Meta-analysis of shared genetic architecture across ten pediatric autoimmune diseases.	Pediatric autoimmune diseases	97 European ancestry thyroiditis cases, 107 European ancestry ankylosing spondylitis cases, 100 European ancestry psoriasis cases, 173 European ancestry celiac disease cases, 254 European ancestry systemic lupus erythematosus cases, 308 European ancestry common variable inmunodeficiency cases, 865 European ancestry ulcerative colitis cases, 1,086 European ancestry Type 1 diabetes cases, 1,123 Eur…		20q13.33	20	63637985	TNFRSF6B	MHENCR - STMN3	ENSG00000232442	ENSG00000197457	9161	1720	rs2738774-A	rs2738774	intergenic_variant	0.32	9e-07
2016-08-31	26301688	Li YR	2015-08-24	Nat Med	www.ncbi.nlm.nih.gov/pubmed/26301688	Meta-analysis of shared genetic architecture across ten pediatric autoimmune diseases.	Pediatric autoimmune diseases	97 European ancestry thyroiditis cases, 107 European ancestry ankylosing spondylitis cases, 100 European ancestry psoriasis cases, 173 European ancestry celiac disease cases, 254 European ancestry systemic lupus erythematosus cases, 308 European ancestry common variable inmunodeficiency cases, 865 European ancestry ulcerative colitis cases, 1,086 European ancestry Type 1 diabetes cases, 1,123 Eur…		1p31.1	1	81771892	LPHN2	ADGRL2					rs2066363-C	rs2066363	intron_variant	0.34	8e-11
2016-08-31	26301688	Li YR	2015-08-24	Nat Med	www.ncbi.nlm.nih.gov/pubmed/26301688	Meta-analysis of shared genetic architecture across ten pediatric autoimmune diseases.	Pediatric autoimmune diseases	97 European ancestry thyroiditis cases, 107 European ancestry ankylosing spondylitis cases, 100 European ancestry psoriasis cases, 173 European ancestry celiac disease cases, 254 European ancestry systemic lupus erythematosus cases, 308 European ancestry common variable inmunodeficiency cases, 865 European ancestry ulcerative colitis cases, 1,086 European ancestry Type 1 diabetes cases, 1,123 Eur…		4p16.2	4	4990640	CYTL1	RN7SKP113 - CYTL1	ENSG00000200761	ENSG00000170891	69576	23946	rs7672495-C	rs7672495	regulatory_region_variant	0.18	1e-07
2016-08-31	26301688	Li YR	2015-08-24	Nat Med	www.ncbi.nlm.nih.gov/pubmed/26301688	Meta-analysis of shared genetic architecture across ten pediatric autoimmune diseases.	Pediatric autoimmune diseases	97 European ancestry thyroiditis cases, 107 European ancestry ankylosing spondylitis cases, 100 European ancestry psoriasis cases, 173 European ancestry celiac disease cases, 254 European ancestry systemic lupus erythematosus cases, 308 European ancestry common variable inmunodeficiency cases, 865 European ancestry ulcerative colitis cases, 1,086 European ancestry Type 1 diabetes cases, 1,123 Eur…		4q35.1	4	182824168	TNM3	TENM3 - DCTD	ENSG00000218336	ENSG00000129187	21144	65892	rs7660520-A	rs7660520	intergenic_variant	0.26	8e-11
2016-08-31	26301688	Li YR	2015-08-24	Nat Med	www.ncbi.nlm.nih.gov/pubmed/26301688	Meta-analysis of shared genetic architecture across ten pediatric autoimmune diseases.	Pediatric autoimmune diseases	97 European ancestry thyroiditis cases, 107 European ancestry ankylosing spondylitis cases, 100 European ancestry psoriasis cases, 173 European ancestry celiac disease cases, 254 European ancestry systemic lupus erythematosus cases, 308 European ancestry common variable inmunodeficiency cases, 865 European ancestry ulcerative colitis cases, 1,086 European ancestry Type 1 diabetes cases, 1,123 Eur…		8q24.23	8	137124061	intergenic	RNU6-144P - NA	ENSG00000206678		18603		rs7831697-G	rs7831697	regulatory_region_variant	0.25	5e-07
2016-08-31	26301688	Li YR	2015-08-24	Nat Med	www.ncbi.nlm.nih.gov/pubmed/26301688	Meta-analysis of shared genetic architecture across ten pediatric autoimmune diseases.	Pediatric autoimmune diseases	97 European ancestry thyroiditis cases, 107 European ancestry ankylosing spondylitis cases, 100 European ancestry psoriasis cases, 173 European ancestry celiac disease cases, 254 European ancestry systemic lupus erythematosus cases, 308 European ancestry common variable inmunodeficiency cases, 865 European ancestry ulcerative colitis cases, 1,086 European ancestry Type 1 diabetes cases, 1,123 Eur…		9p23	9	12785074	LURAP1L	LURAP1L-AS1, LURAP1L					rs7042370-T	rs7042370	intron_variant	0.43	1e-07
2016-08-31	26301688	Li YR	2015-08-24	Nat Med	www.ncbi.nlm.nih.gov/pubmed/26301688	Meta-analysis of shared genetic architecture across ten pediatric autoimmune diseases.	Pediatric autoimmune diseases	97 European ancestry thyroiditis cases, 107 European ancestry ankylosing spondylitis cases, 100 European ancestry psoriasis cases, 173 European ancestry celiac disease cases, 254 European ancestry systemic lupus erythematosus cases, 308 European ancestry common variable inmunodeficiency cases, 865 European ancestry ulcerative colitis cases, 1,086 European ancestry Type 1 diabetes cases, 1,123 Eur…		9q34.11	9	129894985	FNBP1	FNBP1					rs10988542-C	rs10988542	intron_variant	0.08	7e-07
2016-08-31	26301688	Li YR	2015-08-24	Nat Med	www.ncbi.nlm.nih.gov/pubmed/26301688	Meta-analysis of shared genetic architecture across ten pediatric autoimmune diseases.	Pediatric autoimmune diseases	97 European ancestry thyroiditis cases, 107 European ancestry ankylosing spondylitis cases, 100 European ancestry psoriasis cases, 173 European ancestry celiac disease cases, 254 European ancestry systemic lupus erythematosus cases, 308 European ancestry common variable inmunodeficiency cases, 865 European ancestry ulcerative colitis cases, 1,086 European ancestry Type 1 diabetes cases, 1,123 Eur…		10p11.21	10	37303610	ANKRD30A	LINC00993					rs7100025-G	rs7100025	intron_variant	0.34	8e-11
2016-08-31	26301688	Li YR	2015-08-24	Nat Med	www.ncbi.nlm.nih.gov/pubmed/26301688	Meta-analysis of shared genetic architecture across ten pediatric autoimmune diseases.	Pediatric autoimmune diseases	97 European ancestry thyroiditis cases, 107 European ancestry ankylosing spondylitis cases, 100 European ancestry psoriasis cases, 173 European ancestry celiac disease cases, 254 European ancestry systemic lupus erythematosus cases, 308 European ancestry common variable inmunodeficiency cases, 865 European ancestry ulcerative colitis cases, 1,086 European ancestry Type 1 diabetes cases, 1,123 Eur…		13q33.3	13	106410694	EFNB2	LINC00460 - RPL35P9	ENSG00000233532	ENSG00000174418	26379	15079	rs11839053-C	rs11839053	intergenic_variant	0.02	1e-06
2016-08-31	26301688	Li YR	2015-08-24	Nat Med	www.ncbi.nlm.nih.gov/pubmed/26301688	Meta-analysis of shared genetic architecture across ten pediatric autoimmune diseases.	Pediatric autoimmune diseases	97 European ancestry thyroiditis cases, 107 European ancestry ankylosing spondylitis cases, 100 European ancestry psoriasis cases, 173 European ancestry celiac disease cases, 254 European ancestry systemic lupus erythematosus cases, 308 European ancestry common variable inmunodeficiency cases, 865 European ancestry ulcerative colitis cases, 1,086 European ancestry Type 1 diabetes cases, 1,123 Eur…		Xq26.3	X	136949968	RBMX	RPL22P23 - SRRM1P3	ENSG00000232379	ENSG00000237307	1835	26449	rs12863738-T	rs12863738	intron_variant	0.17	6e-08

## Sheet: ST_5
Table S5. Genes previously linked with JIA in DisGeNET.
geneId	geneSymbol	DSI	DPI	diseaseId	diseaseName	diseaseType	diseaseClass	diseaseSemanticType	score	EI	YearInitial	YearFinal	NofPmids	NofSnps	source
55	ACP3	0.525	0.731	C3495559	Juvenile arthritis	disease	C17;C05;C20	Disease or Syndrome	0.3	1	2009	2009	1	0	CTD_human
113	ADCY7	0.656	0.462	C3495559	Juvenile arthritis	disease	C17;C05;C20	Disease or Syndrome	0.4	1	2009	2015	1	1	CTD_human
239	ALOX12	0.558	0.692	C3495559	Juvenile arthritis	disease	C17;C05;C20	Disease or Syndrome	0.3	1	2009	2009	1	0	CTD_human
366	AQP9	0.565	0.808	C3495559	Juvenile arthritis	disease	C17;C05;C20	Disease or Syndrome	0.3	1	2009	2009	1	0	CTD_human
374	AREG	0.487	0.769	C3495559	Juvenile arthritis	disease	C17;C05;C20	Disease or Syndrome	0.3	1	2009	2009	1	0	CTD_human
473	RERE	0.526	0.846	C3495559	Juvenile arthritis	disease	C17;C05;C20	Disease or Syndrome	0.3	1	2009	2009	1	0	CTD_human
694	BTG1	0.564	0.692	C3495559	Juvenile arthritis	disease	C17;C05;C20	Disease or Syndrome	0.3	1	2009	2009	1	0	CTD_human
732	C8B	0.76	0.269	C3495559	Juvenile arthritis	disease	C17;C05;C20	Disease or Syndrome	0.3	1	1994	1994	1	0	CTD_human
800	CALD1	0.578	0.692	C3495559	Juvenile arthritis	disease	C17;C05;C20	Disease or Syndrome	0.3	1	2009	2009	1	0	CTD_human
919	CD247	0.539	0.731	C2931171	Juvenile pauciarticular chronic arthritis	disease	C17;C05;C20	Disease or Syndrome	0.3	1	2012	2012	1	0	ORPHANET
926	CD8B	0.674	0.462	C3495559	Juvenile arthritis	disease	C17;C05;C20	Disease or Syndrome	0.3	1	2009	2009	1	0	CTD_human
929	CD14	0.392	0.885	C3495559	Juvenile arthritis	disease	C17;C05;C20	Disease or Syndrome	0.31	1	2009	2009	1	0	CTD_human
1191	CLU	0.426	0.885	C3495559	Juvenile arthritis	disease	C17;C05;C20	Disease or Syndrome	0.3	1	2009	2009	1	0	CTD_human
1390	CREM	0.575	0.692	C3495559	Juvenile arthritis	disease	C17;C05;C20	Disease or Syndrome	0.3	1	2009	2009	1	0	CTD_human
1493	CTLA4	0.369	0.923	C3495559	Juvenile arthritis	disease	C17;C05;C20	Disease or Syndrome	0.33	1	2006	2010	1	0	CTD_human
1612	DAPK1	0.472	0.808	C3495559	Juvenile arthritis	disease	C17;C05;C20	Disease or Syndrome	0.3	1	2009	2009	1	0	CTD_human
1647	GADD45A	0.526	0.769	C3495559	Juvenile arthritis	disease	C17;C05;C20	Disease or Syndrome	0.3	1	2009	2009	1	0	CTD_human
1649	DDIT3	0.467	0.846	C3495559	Juvenile arthritis	disease	C17;C05;C20	Disease or Syndrome	0.3	1	2009	2009	1	0	CTD_human
1839	HBEGF	0.52	0.769	C3495559	Juvenile arthritis	disease	C17;C05;C20	Disease or Syndrome	0.3	1	2009	2009	1	0	CTD_human
1843	DUSP1	0.491	0.808	C3495559	Juvenile arthritis	disease	C17;C05;C20	Disease or Syndrome	0.3	1	2009	2009	1	0	CTD_human
1844	DUSP2	0.558	0.769	C3495559	Juvenile arthritis	disease	C17;C05;C20	Disease or Syndrome	0.3	1	2009	2009	1	0	CTD_human
1846	DUSP4	0.603	0.654	C3495559	Juvenile arthritis	disease	C17;C05;C20	Disease or Syndrome	0.3	1	2009	2009	1	0	CTD_human
1950	EGF	0.357	0.923	C3495559	Juvenile arthritis	disease	C17;C05;C20	Disease or Syndrome	0.3	1	2009	2009	1	0	CTD_human
1958	EGR1	0.433	0.923	C3495559	Juvenile arthritis	disease	C17;C05;C20	Disease or Syndrome	0.3	1	2009	2009	1	0	CTD_human
1998	ELF2	0.743	0.308	C3495559	Juvenile arthritis	disease	C17;C05;C20	Disease or Syndrome	0.3	1	2009	2009	1	0	CTD_human
2017	CTTN	0.546	0.769	C3495559	Juvenile arthritis	disease	C17;C05;C20	Disease or Syndrome	0.3	1	2009	2009	1	0	CTD_human
2120	ETV6	0.477	0.731	C3495559	Juvenile arthritis	disease	C17;C05;C20	Disease or Syndrome	0.3	1	2009	2009	1	0	CTD_human
2209	FCGR1A	0.532	0.731	C3495559	Juvenile arthritis	disease	C17;C05;C20	Disease or Syndrome	0.3	1	2009	2009	1	0	CTD_human
2353	FOS	0.411	0.885	C3495559	Juvenile arthritis	disease	C17;C05;C20	Disease or Syndrome	0.3	1	2009	2009	1	0	CTD_human
2354	FOSB	0.463	0.846	C3495559	Juvenile arthritis	disease	C17;C05;C20	Disease or Syndrome	0.3	1	2009	2009	1	0	CTD_human
2355	FOSL2	0.595	0.692	C3495559	Juvenile arthritis	disease	C17;C05;C20	Disease or Syndrome	0.3	1	2009	2009	1	0	CTD_human
2766	GMPR	0.792	0.231	C3495559	Juvenile arthritis	disease	C17;C05;C20	Disease or Syndrome	0.3	1	2009	2009	1	0	CTD_human
2791	GNG11	0.76	0.231	C3495559	Juvenile arthritis	disease	C17;C05;C20	Disease or Syndrome	0.3	1	2009	2009	1	0	CTD_human
2812	GP1BB	0.524	0.769	C3495559	Juvenile arthritis	disease	C17;C05;C20	Disease or Syndrome	0.3	1	2009	2009	1	0	CTD_human
2919	CXCL1	0.449	0.923	C3495559	Juvenile arthritis	disease	C17;C05;C20	Disease or Syndrome	0.31	1	2009	2017	1	0	CTD_human
3012	H2AC8	0.839	0.115	C3495559	Juvenile arthritis	disease	C17;C05;C20	Disease or Syndrome	0.3	1	2009	2009	1	0	CTD_human
3084	NRG1	0.464	0.885	C3495559	Juvenile arthritis	disease	C17;C05;C20	Disease or Syndrome	0.3	1	2009	2009	1	0	CTD_human
3310	HSPA6	0.743	0.423	C3495559	Juvenile arthritis	disease	C17;C05;C20	Disease or Syndrome	0.3	1	2009	2009	1	0	CTD_human
3480	IGF1R	0.399	0.885	C3495559	Juvenile arthritis	disease	C17;C05;C20	Disease or Syndrome	0.3	1	2009	2009	1	0	CTD_human
3557	IL1RN	0.373	0.923	C3495559	Juvenile arthritis	disease	C17;C05;C20	Disease or Syndrome	0.34	1	2001	2018	1	0	CTD_human
3559	IL2RA	0.389	0.885	C2931171	Juvenile pauciarticular chronic arthritis	disease	C17;C05;C20	Disease or Syndrome	0.4	1	2012	2013	1	2	ORPHANET
3560	IL2RB	0.491	0.846	C2931171	Juvenile pauciarticular chronic arthritis	disease	C17;C05;C20	Disease or Syndrome	0.4	1	2013	2013	1	1	ORPHANET
3579	CXCR2	0.445	0.923	C3495559	Juvenile arthritis	disease	C17;C05;C20	Disease or Syndrome	0.3	1	2009	2009	1	0	CTD_human
3674	ITGA2B	0.493	0.692	C3495559	Juvenile arthritis	disease	C17;C05;C20	Disease or Syndrome	0.3	1	2009	2009	1	0	CTD_human
3693	ITGB5	0.656	0.577	C3495559	Juvenile arthritis	disease	C17;C05;C20	Disease or Syndrome	0.3	1	2009	2009	1	0	CTD_human
3725	JUN	0.442	0.885	C3495559	Juvenile arthritis	disease	C17;C05;C20	Disease or Syndrome	0.3	1	2009	2009	1	0	CTD_human
3772	KCNJ15	0.769	0.308	C3495559	Juvenile arthritis	disease	C17;C05;C20	Disease or Syndrome	0.3	1	2009	2009	1	0	CTD_human
3845	KRAS	0.32	0.923	C3495559	Juvenile arthritis	disease	C17;C05;C20	Disease or Syndrome	0.3	1	2009	2009	1	0	CTD_human
4026	LPP	0.543	0.769	C3495559	Juvenile arthritis	disease	C17;C05;C20	Disease or Syndrome	0.32	0.667	2009	2012	1	0	CTD_human
4088	SMAD3	0.415	0.923	C3495559	Juvenile arthritis	disease	C17;C05;C20	Disease or Syndrome	0.4	1	2009	2015	1	1	CTD_human
4133	MAP2	0.537	0.692	C3495559	Juvenile arthritis	disease	C17;C05;C20	Disease or Syndrome	0.3	1	2009	2009	1	0	CTD_human
4478	MSN	0.534	0.769	C3495559	Juvenile arthritis	disease	C17;C05;C20	Disease or Syndrome	0.3	1	2009	2009	1	0	CTD_human
4929	NR4A2	0.529	0.846	C3495559	Juvenile arthritis	disease	C17;C05;C20	Disease or Syndrome	0.3	1	2009	2009	1	0	CTD_human
4973	OLR1	0.544	0.769	C3495559	Juvenile arthritis	disease	C17;C05;C20	Disease or Syndrome	0.3	1	2009	2009	1	0	CTD_human
5008	OSM	0.505	0.769	C3495559	Juvenile arthritis	disease	C17;C05;C20	Disease or Syndrome	0.31	1	2003	2009	1	0	CTD_human
5187	PER1	0.556	0.731	C3495559	Juvenile arthritis	disease	C17;C05;C20	Disease or Syndrome	0.3	1	2009	2009	1	0	CTD_human
5239	PGM5	0.751	0.269	C3495559	Juvenile arthritis	disease	C17;C05;C20	Disease or Syndrome	0.3	1	2009	2009	1	0	CTD_human
5329	PLAUR	0.536	0.731	C3495559	Juvenile arthritis	disease	C17;C05;C20	Disease or Syndrome	0.3	1	2009	2009	1	0	CTD_human
5352	PLOD2	0.559	0.654	C3495559	Juvenile arthritis	disease	C17;C05;C20	Disease or Syndrome	0.3	1	2009	2009	1	0	CTD_human
5594	MAPK1	0.33	0.923	C3495559	Juvenile arthritis	disease	C17;C05;C20	Disease or Syndrome	0.3	1	2009	2009	1	0	CTD_human
5627	PROS1	0.467	0.846	C3495559	Juvenile arthritis	disease	C17;C05;C20	Disease or Syndrome	0.3	1	2009	2009	1	0	CTD_human
5771	PTPN2	0.538	0.692	C2931171	Juvenile pauciarticular chronic arthritis	disease	C17;C05;C20	Disease or Syndrome	0.4	1	2012	2013	1	1	ORPHANET
6515	SLC2A3	0.534	0.769	C3495559	Juvenile arthritis	disease	C17;C05;C20	Disease or Syndrome	0.3	1	2009	2009	1	0	CTD_human
6556	SLC11A1	0.525	0.846	C3495559	Juvenile arthritis	disease	C17;C05;C20	Disease or Syndrome	0.33	1	1999	2006	1	0	CTD_human
6774	STAT3	0.32	0.923	C3495559	Juvenile arthritis	disease	C17;C05;C20	Disease or Syndrome	0.3	1	2009	2009	1	0	CTD_human
6775	STAT4	0.471	0.769	C2931171	Juvenile pauciarticular chronic arthritis	disease	C17;C05;C20	Disease or Syndrome	0.4	1	2013	2013	1	1	ORPHANET
6786	STIM1	0.501	0.808	C3495559	Juvenile arthritis	disease	C17;C05;C20	Disease or Syndrome	0.3	1	2009	2009	1	0	CTD_human
6934	TCF7L2	0.485	0.846	C3495559	Juvenile arthritis	disease	C17;C05;C20	Disease or Syndrome	0.3	1	2009	2009	1	0	CTD_human
7027	TFDP1	0.623	0.692	C3495559	Juvenile arthritis	disease	C17;C05;C20	Disease or Syndrome	0.3	1	2009	2009	1	0	CTD_human
7035	TFPI	0.486	0.808	C3495559	Juvenile arthritis	disease	C17;C05;C20	Disease or Syndrome	0.3	1	2009	2009	1	0	CTD_human
7057	THBS1	0.407	0.885	C3495559	Juvenile arthritis	disease	C17;C05;C20	Disease or Syndrome	0.3	1	2009	2009	1	0	CTD_human
7130	TNFAIP6	0.582	0.731	C3495559	Juvenile arthritis	disease	C17;C05;C20	Disease or Syndrome	0.3	1	2009	2009	1	0	CTD_human
7280	TUBB2A	0.678	0.538	C3495559	Juvenile arthritis	disease	C17;C05;C20	Disease or Syndrome	0.3	1	2009	2009	1	0	CTD_human
7324	UBE2E1	0.743	0.269	C3495559	Juvenile arthritis	disease	C17;C05;C20	Disease or Syndrome	0.3	1	2009	2009	1	0	CTD_human
7844	RNF103	0.821	0.154	C3495559	Juvenile arthritis	disease	C17;C05;C20	Disease or Syndrome	0.3	1	2009	2009	1	0	CTD_human
7852	CXCR4	0.362	0.923	C3495559	Juvenile arthritis	disease	C17;C05;C20	Disease or Syndrome	0.31	1	2009	2016	2	0	CTD_human
8013	NR4A3	0.502	0.808	C3495559	Juvenile arthritis	disease	C17;C05;C20	Disease or Syndrome	0.3	1	2009	2009	1	0	CTD_human
8291	DYSF	0.582	0.692	C3495559	Juvenile arthritis	disease	C17;C05;C20	Disease or Syndrome	0.3	1	2009	2009	1	0	CTD_human
8339	H2BC8	0.769	0.231	C3495559	Juvenile arthritis	disease	C17;C05;C20	Disease or Syndrome	0.3	1	2009	2009	1	0	CTD_human
8379	MAD1L1	0.57	0.731	C3495559	Juvenile arthritis	disease	C17;C05;C20	Disease or Syndrome	0.3	1	2009	2009	1	0	CTD_human
8794	TNFRSF10C	0.578	0.731	C3495559	Juvenile arthritis	disease	C17;C05;C20	Disease or Syndrome	0.3	1	2009	2009	1	0	CTD_human
9308	CD83	0.566	0.731	C3495559	Juvenile arthritis	disease	C17;C05;C20	Disease or Syndrome	0.3	1	2009	2009	1	0	CTD_human
9314	KLF4	0.449	0.769	C3495559	Juvenile arthritis	disease	C17;C05;C20	Disease or Syndrome	0.3	1	2009	2009	1	0	CTD_human
9334	B4GALT5	0.76	0.308	C3495559	Juvenile arthritis	disease	C17;C05;C20	Disease or Syndrome	0.3	1	2009	2009	1	0	CTD_human
9468	PCYT1B	0.641	0.731	C3495559	Juvenile arthritis	disease	C17;C05;C20	Disease or Syndrome	0.3	1	2009	2009	1	0	CTD_human
9690	UBE3C	0.722	0.577	C3495559	Juvenile arthritis	disease	C17;C05;C20	Disease or Syndrome	0.3	1	2009	2009	1	0	CTD_human
9788	MTSS1	0.581	0.654	C3495559	Juvenile arthritis	disease	C17;C05;C20	Disease or Syndrome	0.3	1	2009	2009	1	0	CTD_human
9873	FCHSD2	0.743	0.346	C3495559	Juvenile arthritis	disease	C17;C05;C20	Disease or Syndrome	0.3	1	2009	2009	1	0	CTD_human
9886	RHOBTB1	0.722	0.308	C3495559	Juvenile arthritis	disease	C17;C05;C20	Disease or Syndrome	0.3	1	2009	2009	1	0	CTD_human
10769	PLK2	0.575	0.808	C3495559	Juvenile arthritis	disease	C17;C05;C20	Disease or Syndrome	0.3	1	2009	2009	1	0	CTD_human
10810	WASF3	0.595	0.769	C3495559	Juvenile arthritis	disease	C17;C05;C20	Disease or Syndrome	0.3	1	2009	2009	1	0	CTD_human
10826	FAXDC2	0.839	0.115	C3495559	Juvenile arthritis	disease	C17;C05;C20	Disease or Syndrome	0.3	1	2009	2009	1	0	CTD_human
10950	BTG3	0.528	0.808	C3495559	Juvenile arthritis	disease	C17;C05;C20	Disease or Syndrome	0.32	1	2006	2018	1	0	CTD_human
11252	PACSIN2	0.751	0.385	C3495559	Juvenile arthritis	disease	C17;C05;C20	Disease or Syndrome	0.3	1	2009	2009	1	0	CTD_human
22864	R3HDM2	0.76	0.346	C3495559	Juvenile arthritis	disease	C17;C05;C20	Disease or Syndrome	0.3	1	2009	2009	1	0	CTD_human
23043	TNIK	0.612	0.615	C3495559	Juvenile arthritis	disease	C17;C05;C20	Disease or Syndrome	0.3	1	2009	2009	1	0	CTD_human
23074	UHRF1BP1L	0.821	0.154	C3495559	Juvenile arthritis	disease	C17;C05;C20	Disease or Syndrome	0.3	1	2009	2009	1	0	CTD_human
23080	AVL9	0.792	0.231	C3495559	Juvenile arthritis	disease	C17;C05;C20	Disease or Syndrome	0.3	1	2009	2009	1	0	CTD_human
23093	TTLL5	0.686	0.5	C3495559	Juvenile arthritis	disease	C17;C05;C20	Disease or Syndrome	0.3	1	2009	2009	1	0	CTD_human
23166	STAB1	0.619	0.692	C3495559	Juvenile arthritis	disease	C17;C05;C20	Disease or Syndrome	0.3	1	2009	2009	1	0	CTD_human
23522	KAT6B	0.525	0.731	C3495559	Juvenile arthritis	disease	C17;C05;C20	Disease or Syndrome	0.3	1	2009	2009	1	0	CTD_human
23764	MAFF	0.751	0.346	C3495559	Juvenile arthritis	disease	C17;C05;C20	Disease or Syndrome	0.3	1	2009	2009	1	0	CTD_human
25816	TNFAIP8	0.601	0.5	C3495559	Juvenile arthritis	disease	C17;C05;C20	Disease or Syndrome	0.3	1	2009	2009	1	0	CTD_human
26037	SIPA1L1	0.805	0.192	C3495559	Juvenile arthritis	disease	C17;C05;C20	Disease or Syndrome	0.3	1	2009	2009	1	0	CTD_human
26191	PTPN22	0.438	0.846	C2931171	Juvenile pauciarticular chronic arthritis	disease	C17;C05;C20	Disease or Syndrome	0.3	1	2013	2013	1	0	ORPHANET
27086	FOXP1	0.46	0.808	C3495559	Juvenile arthritis	disease	C17;C05;C20	Disease or Syndrome	0.3	1	2009	2009	1	0	CTD_human
50807	ASAP1	0.556	0.808	C3495559	Juvenile arthritis	disease	C17;C05;C20	Disease or Syndrome	0.3	1	2009	2009	1	0	CTD_human
51320	MEX3C	0.751	0.346	C3495559	Juvenile arthritis	disease	C17;C05;C20	Disease or Syndrome	0.3	1	2009	2009	1	0	CTD_human
51338	MS4A4A	0.722	0.308	C3495559	Juvenile arthritis	disease	C17;C05;C20	Disease or Syndrome	0.3	1	2009	2009	1	0	CTD_human
51741	WWOX	0.453	0.808	C3495559	Juvenile arthritis	disease	C17;C05;C20	Disease or Syndrome	0.3	1	2009	2009	1	0	CTD_human
54502	RBM47	0.729	0.308	C3495559	Juvenile arthritis	disease	C17;C05;C20	Disease or Syndrome	0.3	1	2009	2009	1	0	CTD_human
54757	FAM20A	0.7	0.346	C3495559	Juvenile arthritis	disease	C17;C05;C20	Disease or Syndrome	0.3	1	2009	2009	1	0	CTD_human
55500	ETNK1	0.716	0.385	C3495559	Juvenile arthritis	disease	C17;C05;C20	Disease or Syndrome	0.3	1	2009	2009	1	0	CTD_human
60685	ZFAND3	0.792	0.192	C3495559	Juvenile arthritis	disease	C17;C05;C20	Disease or Syndrome	0.3	1	2009	2009	1	0	CTD_human
64224	HERPUD2	0.839	0.115	C3495559	Juvenile arthritis	disease	C17;C05;C20	Disease or Syndrome	0.3	1	2009	2009	1	0	CTD_human
79722	ANKRD55	0.65	0.462	C2931171	Juvenile pauciarticular chronic arthritis	disease	C17;C05;C20	Disease or Syndrome	0.4	1	2013	2013	1	1	ORPHANET
81565	NDEL1	0.666	0.462	C3495559	Juvenile arthritis	disease	C17;C05;C20	Disease or Syndrome	0.32	1	1994	2009	1	0	CTD_human
83699	SH3BGRL2	0.839	0.115	C3495559	Juvenile arthritis	disease	C17;C05;C20	Disease or Syndrome	0.3	1	2009	2009	1	0	CTD_human
84281	C2orf88	0.821	0.192	C3495559	Juvenile arthritis	disease	C17;C05;C20	Disease or Syndrome	0.3	1	2009	2009	1	0	CTD_human
84441	MAML2	0.592	0.577	C3495559	Juvenile arthritis	disease	C17;C05;C20	Disease or Syndrome	0.3	1	2009	2009	1	0	CTD_human
84519	ACRBP	0.705	0.308	C3495559	Juvenile arthritis	disease	C17;C05;C20	Disease or Syndrome	0.3	1	2009	2009	1	0	CTD_human
84909	AOPEP	0.729	0.423	C3495559	Juvenile arthritis	disease	C17;C05;C20	Disease or Syndrome	0.3	1	2009	2009	1	0	CTD_human
84981	MIR22HG	0.659	0.423	C3495559	Juvenile arthritis	disease	C17;C05;C20	Disease or Syndrome	0.3	1	2009	2009	1	0	CTD_human
85413	SLC22A16	0.626	0.5	C3495559	Juvenile arthritis	disease	C17;C05;C20	Disease or Syndrome	0.3	1	2009	2009	1	0	CTD_human
122416	ANKRD9	0.805	0.192	C3495559	Juvenile arthritis	disease	C17;C05;C20	Disease or Syndrome	0.3	1	2009	2009	1	0	CTD_human
139105	BEND2	0.839	0.115	C3495559	Juvenile arthritis	disease	C17;C05;C20	Disease or Syndrome	0.3	1	2009	2009	1	0	CTD_human
146225	CMTM2	0.78	0.231	C3495559	Juvenile arthritis	disease	C17;C05;C20	Disease or Syndrome	0.3	1	2009	2009	1	0	CTD_human
150094	SIK1	0.544	0.731	C3495559	Juvenile arthritis	disease	C17;C05;C20	Disease or Syndrome	0.3	1	2009	2009	1	0	CTD_human
153020	RASGEF1B	0.821	0.154	C3495559	Juvenile arthritis	disease	C17;C05;C20	Disease or Syndrome	0.3	1	2009	2009	1	0	CTD_human
157922	CAMSAP1	0.821	0.231	C3495559	Juvenile arthritis	disease	C17;C05;C20	Disease or Syndrome	0.3	1	2009	2009	1	0	CTD_human
196441	ZFC3H1	0.839	0.115	C3495559	Juvenile arthritis	disease	C17;C05;C20	Disease or Syndrome	0.3	1	2009	2009	1	0	CTD_human
200315	APOBEC3A	0.612	0.692	C3495559	Juvenile arthritis	disease	C17;C05;C20	Disease or Syndrome	0.3	1	2009	2009	1	0	CTD_human
203228	C9orf72	0.496	0.769	C3495559	Juvenile arthritis	disease	C17;C05;C20	Disease or Syndrome	0.3	1	2009	2009	1	0	CTD_human
221037	JMJD1C	0.517	0.769	C3495559	Juvenile arthritis	disease	C17;C05;C20	Disease or Syndrome	0.4	1	2009	2012	1	9	CTD_human
283131	NEAT1	0.502	0.769	C3495559	Juvenile arthritis	disease	C17;C05;C20	Disease or Syndrome	0.3	1	2009	2009	1	0	CTD_human
340205	TREML1	0.743	0.346	C3495559	Juvenile arthritis	disease	C17;C05;C20	Disease or Syndrome	0.3	1	2009	2009	1	0	CTD_human
353514	LILRA5	0.839	0.115	C3495559	Juvenile arthritis	disease	C17;C05;C20	Disease or Syndrome	0.3	1	2009	2009	1	0	CTD_human
100820829	MYZAP	0.769	0.308	C3495559	Juvenile arthritis	disease	C17;C05;C20	Disease or Syndrome	0.3	1	2009	2009	1	0	CTD_human

## Sheet: ST_6
Table S6. Gene Ontology biological process and KEGG pathway enrichment analysis results of JIA causal genes.
GO:BP = Gene Ontology Biological Process; KEGG = Kyoto Encyclopedia of Genes and Genomes
Source	Term_name	Term_id	Adjusted_p_value	Negative_log10_of_adjusted_p_value	Term_size	Query_size	Intersection_size	Effective_domain_size	intersections (genes)
GO:BP	antigen processing and presentation	GO:0019882	3.48549e-06	5.45774	115	40	7	21031	ERAP2,HLA-DQB2,PSMB8,TAP1,HLA-DMB,HLA-A,HLA-DRB1
GO:BP	antigen processing and presentation of peptide antigen	GO:0048002	5.73204e-06	5.24169	68	40	6	21031	ERAP2,HLA-DQB2,TAP1,HLA-DMB,HLA-A,HLA-DRB1
GO:BP	regulation of cytokine production	GO:0001817	2.16038e-05	4.66547	773	40	12	21031	GPSM3,AGPAT1,LTB,AGER,HSPA1B,IL6ST,PPP1R11,HLA-A,HSP90AB1,HLA-DRB1,MOG,LTA
GO:BP	cytokine production	GO:0001816	2.35406e-05	4.62818	779	40	12	21031	GPSM3,AGPAT1,LTB,AGER,HSPA1B,IL6ST,PPP1R11,HLA-A,HSP90AB1,HLA-DRB1,MOG,LTA
GO:BP	antigen processing and presentation of endogenous peptide antigen	GO:0002483	0.000207049	3.68393	24	40	4	21031	ERAP2,TAP1,HLA-A,HLA-DRB1
GO:BP	positive regulation of response to stimulus	GO:0048584	0.000488906	3.31077	2274	40	17	21031	GPSM3,AGPAT1,CSNK2B,LTB,AGER,HLA-DQB2,HSPA1B,IL6ST,TRIM39,HLA-DMB,BAK1,HLA-A,HSP90AB1,HLA-DRB1,MOG,LTA,NCR3
GO:BP	antigen processing and presentation of endogenous antigen	GO:0019883	0.000607248	3.21663	31	40	4	21031	ERAP2,TAP1,HLA-A,HLA-DRB1
GO:BP	antigen processing and presentation of exogenous peptide antigen	GO:0002478	0.00141097	2.85048	38	40	4	21031	HLA-DQB2,HLA-DMB,HLA-A,HLA-DRB1
GO:BP	immune system process	GO:0002376	0.00155753	2.80756	2776	40	18	21031	GPSM3,LTB,AGER,ERAP2,HLA-DQB2,HSPA1B,PSMB8,IL6ST,TAP1,TRIM26,HLA-DMB,BAK1,HLA-A,LST1,HLA-DRB1,MOG,LTA,NCR3
GO:BP	immune response	GO:0006955	0.00297265	2.52686	1988	40	15	21031	LTB,AGER,ERAP2,HLA-DQB2,HSPA1B,IL6ST,TAP1,TRIM26,HLA-DMB,HLA-A,LST1,HLA-DRB1,MOG,LTA,NCR3
GO:BP	MHC class II protein complex assembly	GO:0002399	0.00321244	2.49317	13	40	3	21031	HLA-DQB2,HLA-DMB,HLA-DRB1
GO:BP	peptide antigen assembly with MHC class II protein complex	GO:0002503	0.00321244	2.49317	13	40	3	21031	HLA-DQB2,HLA-DMB,HLA-DRB1
GO:BP	antigen processing and presentation of exogenous antigen	GO:0019884	0.00336767	2.47267	47	40	4	21031	HLA-DQB2,HLA-DMB,HLA-A,HLA-DRB1
GO:BP	regulation of adaptive immune response	GO:0002819	0.00380596	2.41954	202	40	6	21031	AGER,HLA-DQB2,IL6ST,HLA-A,HLA-DRB1,LTA
GO:BP	regulation of multicellular organismal process	GO:0051239	0.00393429	2.40513	2955	40	18	21031	GPSM3,AGPAT1,CSNK2B,LTB,AGER,HLA-DQB2,HSPA1B,SGF29,FKBPL,IL6ST,PPP1R11,HLA-DMB,HLA-A,HSP90AB1,LST1,HLA-DRB1,MOG,LTA
GO:BP	positive regulation of immune system process	GO:0002684	0.00513165	2.28974	1054	40	11	21031	GPSM3,AGER,HLA-DQB2,HSPA1B,IL6ST,HLA-DMB,HLA-A,HLA-DRB1,MOG,LTA,NCR3
GO:BP	positive regulation of cytokine production	GO:0001819	0.00584725	2.23305	490	40	8	21031	GPSM3,AGPAT1,LTB,AGER,HSPA1B,IL6ST,HLA-A,LTA
GO:BP	positive regulation of adaptive immune response	GO:0002821	0.00707896	2.15003	126	40	5	21031	HLA-DQB2,IL6ST,HLA-A,HLA-DRB1,LTA
GO:BP	MHC protein complex assembly	GO:0002396	0.00759775	2.11932	17	40	3	21031	HLA-DQB2,HLA-DMB,HLA-DRB1
GO:BP	peptide antigen assembly with MHC protein complex	GO:0002501	0.00759775	2.11932	17	40	3	21031	HLA-DQB2,HLA-DMB,HLA-DRB1
GO:BP	regulation of immune response	GO:0050776	0.00761783	2.11817	881	40	10	21031	AGER,HLA-DQB2,HSPA1B,IL6ST,HLA-DMB,HLA-A,HLA-DRB1,MOG,LTA,NCR3
GO:BP	regulation of response to stress	GO:0080134	0.00799245	2.09732	1340	40	12	21031	GPSM3,AGER,HSPA1B,SGF29,CLN3,IL6ST,PPP1R10,BAK1,HLA-A,HLA-DRB1,LTA,NCR3
GO:BP	regulation of lymphocyte proliferation	GO:0050670	0.00956213	2.01945	237	40	6	21031	AGER,IL6ST,HLA-DMB,HLA-A,LST1,HLA-DRB1
GO:BP	response to stress	GO:0006950	0.00970128	2.01317	3855	40	20	21031	MSH5,GPSM3,AGER,HLA-DQB2,HSPA1B,SGF29,CLN3,IL6ST,PPP1R10,PPP1R11,TAP1,TRIM39,TRIM26,EHMT2,BAK1,HLA-A,HSP90AB1,HLA-DRB1,LTA,NCR3
GO:BP	regulation of mononuclear cell proliferation	GO:0032944	0.0105248	1.97779	241	40	6	21031	AGER,IL6ST,HLA-DMB,HLA-A,LST1,HLA-DRB1
GO:BP	positive regulation of immune response	GO:0050778	0.011318	1.94623	718	40	9	21031	HLA-DQB2,HSPA1B,IL6ST,HLA-DMB,HLA-A,HLA-DRB1,MOG,LTA,NCR3
GO:BP	positive regulation of T cell activation	GO:0050870	0.0121154	1.91666	247	40	6	21031	AGER,HLA-DQB2,IL6ST,HLA-DMB,HLA-A,HLA-DRB1
GO:BP	regulation of response to stimulus	GO:0048583	0.0136428	1.8651	3939	40	20	21031	GPSM3,AGPAT1,CSNK2B,LTB,AGER,HLA-DQB2,HSPA1B,SGF29,CLN3,IL6ST,PPP1R10,TRIM39,HLA-DMB,BAK1,HLA-A,HSP90AB1,HLA-DRB1,MOG,LTA,NCR3
GO:BP	adaptive immune response	GO:0002250	0.0142794	1.84529	739	40	9	21031	AGER,ERAP2,HLA-DQB2,IL6ST,TAP1,HLA-DMB,HLA-A,HLA-DRB1,LTA
GO:BP	antigen processing and presentation of endogenous peptide antigen via MHC class I	GO:0019885	0.0170935	1.76717	22	40	3	21031	ERAP2,TAP1,HLA-A
GO:BP	regulation of leukocyte proliferation	GO:0070663	0.0184875	1.73312	266	40	6	21031	AGER,IL6ST,HLA-DMB,HLA-A,LST1,HLA-DRB1
GO:BP	positive regulation of leukocyte cell-cell adhesion	GO:1903039	0.0201243	1.69628	270	40	6	21031	AGER,HLA-DQB2,IL6ST,HLA-DMB,HLA-A,HLA-DRB1
GO:BP	lymphocyte activation	GO:0046649	0.0227005	1.64397	783	40	9	21031	AGER,HLA-DQB2,IL6ST,HLA-DMB,BAK1,HLA-A,LST1,HLA-DRB1,NCR3
GO:BP	regulation of immune system process	GO:0002682	0.0273989	1.56227	1512	40	12	21031	GPSM3,AGER,HLA-DQB2,HSPA1B,IL6ST,HLA-DMB,HLA-A,LST1,HLA-DRB1,MOG,LTA,NCR3
GO:BP	antigen processing and presentation of exogenous peptide antigen via MHC class II	GO:0019886	0.0360759	1.44278	28	40	3	21031	HLA-DQB2,HLA-DMB,HLA-DRB1
GO:BP	alpha-beta T cell activation	GO:0046631	0.0379444	1.42085	178	40	5	21031	AGER,HLA-DQB2,IL6ST,HLA-A,HLA-DRB1
GO:BP	regulation of T cell proliferation	GO:0042129	0.0411191	1.38596	181	40	5	21031	AGER,IL6ST,HLA-DMB,HLA-A,HLA-DRB1
GO:BP	regulation of lymphocyte mediated immunity	GO:0002706	0.042222	1.37446	182	40	5	21031	AGER,HLA-A,HLA-DRB1,LTA,NCR3
GO:BP	lymphocyte proliferation	GO:0046651	0.0423541	1.3731	308	40	6	21031	AGER,IL6ST,HLA-DMB,HLA-A,LST1,HLA-DRB1
GO:BP	regulation of leukocyte mediated cytotoxicity	GO:0001910	0.0475123	1.32319	91	40	4	21031	AGER,HLA-A,HLA-DRB1,NCR3
GO:BP	mononuclear cell proliferation	GO:0032943	0.0480506	1.3183	315	40	6	21031	AGER,IL6ST,HLA-DMB,HLA-A,LST1,HLA-DRB1
GO:BP	regulation of adaptive immune response based on somatic recombination of immune receptors built from immunoglobulin superfamily domains	GO:0002822	0.0480866	1.31798	187	40	5	21031	AGER,HLA-DQB2,HLA-A,HLA-DRB1,LTA
KEGG	Antigen processing and presentation	KEGG:04612	7.35662e-07	6.13332	69	21	6	8484	HSPA1B,TAP1,HLA-DMB,HLA-A,HSP90AB1,HLA-DRB1
KEGG	Type I diabetes mellitus	KEGG:04940	0.000154	3.81248	40	21	4	8484	HLA-DMB,HLA-A,HLA-DRB1,LTA
KEGG	Allograft rejection	KEGG:05330	0.00479128	2.31955	34	21	3	8484	HLA-DMB,HLA-A,HLA-DRB1
KEGG	Graft-versus-host disease	KEGG:05332	0.00619165	2.20819	37	21	3	8484	HLA-DMB,HLA-A,HLA-DRB1
KEGG	Epstein-Barr virus infection	KEGG:05169	0.00635651	2.19678	198	21	5	8484	TAP1,HLA-DMB,BAK1,HLA-A,HLA-DRB1
KEGG	Th17 cell differentiation	KEGG:04659	0.00725551	2.13933	105	21	4	8484	IL6ST,HLA-DMB,HSP90AB1,HLA-DRB1
KEGG	Autoimmune thyroid disease	KEGG:05320	0.0144036	1.84153	49	21	3	8484	HLA-DMB,HLA-A,HLA-DRB1
KEGG	Phagosome	KEGG:04145	0.0264867	1.57697	147	21	4	8484	TAP1,HLA-DMB,HLA-A,HLA-DRB1
KEGG	Viral myocarditis	KEGG:05416	0.0303612	1.51768	63	21	3	8484	HLA-DMB,HLA-A,HLA-DRB1

## Sheet: ST_7
Table S7. Gene Ontology biological process enrichment analysis results of JIA causal genes (HLA genes excluded).
GO:BP = Gene Ontology Biological Process
Source	Term_name	Term_id	Adjusted_p_value	Negative_log10_of_adjusted_p_value	Term_size	Query_size	Intersection_size	Effective_domain_size	Intersections (genes)
GO:BP	regulation of cytokine production	GO:0001817	0.000716806	3.1446	739	29	9	21110	GPSM3,AGPAT1,LTB,AGER,IL6ST,PPP1R11,HSP90AB1,MOG,LTA
GO:BP	cytokine production	GO:0001816	0.000767184	3.1151	745	29	9	21110	GPSM3,AGPAT1,LTB,AGER,IL6ST,PPP1R11,HSP90AB1,MOG,LTA
GO:BP	immune system process	GO:0002376	0.0407036	1.39037	2710	29	13	21110	GPSM3,LTB,AGER,ERAP2,PSMB8,IL6ST,TAP1,TRIM39,TRIM26,BAK1,LST1,MOG,LTA

## Sheet: ST_8
Table S8. eQTL-gene interactions (non-spatial) between instrumental variable SNP and identified JIA causal genes in 15 DICE immune cell types. Only eQTL-gene pairs with adjusted p-value ≤ 0.05 are shown.
snp	variant_id	gene	gencode_id	tissue	pval	b	b_se	snp_chrom	snp_locus	maf	gene_chrom	gene_start	gene_end	adj_pval
rs12153855	chr6_32107027_T_C_b38	SLC25A20	ENSG00000178537.9	TREG_MEMORY	4.61628e-05	0.985507	0.225654	chr6	32107027	0.102273	chr3	48856931	48898993	0.00697443
rs13211318	chr6_32134903_A_C_b38	SLC25A20	ENSG00000178537.9	TREG_MEMORY	4.61628e-05	0.985507	0.225654	chr6	32134903	0.102273	chr3	48856931	48898993	0.00697443
rs2927608	chr5_96916728_G_A_b38	ERAP2	ENSG00000164308.16	TH17	7.83516e-28	1.39615	0.073301	chr5	96916728	0.412791	chr5	96875939	96919716	1.35392e-24
rs2927608	chr5_96916728_G_A_b38	ERAP2	ENSG00000164308.16	TH1	8.0699e-29	1.3999	0.0665669	chr5	96916728	0.41358	chr5	96875939	96919716	1.35574e-25
rs2927608	chr5_96916728_G_A_b38	ERAP2	ENSG00000164308.16	B_NAIVE	4.20686e-24	1.24239	0.0786759	chr5	96916728	0.421348	chr5	96875939	96919716	7.26945e-21
rs2927608	chr5_96916728_G_A_b38	ERAP2	ENSG00000164308.16	CD8_N_STIM	9.92786e-33	1.17957	0.0511119	chr5	96916728	0.413793	chr5	96875939	96919716	1.64405e-29
rs2927608	chr5_96916728_G_A_b38	ERAP2	ENSG00000164308.16	TREG_MEMORY	4.09577e-31	1.24906	0.0584171	chr5	96916728	0.409091	chr5	96875939	96919716	7.42564e-28
rs2927608	chr5_96916728_G_A_b38	ERAP2	ENSG00000164308.16	TFH	1.9042e-34	1.36805	0.0560396	chr5	96916728	0.409091	chr5	96875939	96919716	3.38186e-31
rs2927608	chr5_96916728_G_A_b38	ERAP2	ENSG00000164308.16	CLASSICAL_MONOCYTES	1.49703e-34	1.28744	0.05378	chr5	96916728	0.416667	chr5	96875939	96919716	2.49256e-31
rs929156	chr6_30171922_G_A_b38	ERAP2	ENSG00000164308.16	CLASSICAL_MONOCYTES	0.000389174	0.668351	0.178914	chr6	30171922	0.183333	chr5	96875939	96919716	0.0431983
rs2927608	chr5_96916728_G_A_b38	ERAP2	ENSG00000164308.16	CD4_NAIVE	3.65075e-30	1.29333	0.0622096	chr5	96916728	0.408046	chr5	96875939	96919716	5.91421e-27
rs2927608	chr5_96916728_G_A_b38	ERAP2	ENSG00000164308.16	TH1_17	2.06434e-31	1.22989	0.0562113	chr5	96916728	0.413793	chr5	96875939	96919716	3.39584e-28
rs2927608	chr5_96916728_G_A_b38	ERAP2	ENSG00000164308.16	TH2	5.3425e-30	1.33592	0.0646981	chr5	96916728	0.408046	chr5	96875939	96919716	9.48828e-27
rs2927608	chr5_96916728_G_A_b38	ERAP2	ENSG00000164308.16	CD8_NAIVE	4.77525e-33	1.32757	0.0574673	chr5	96916728	0.409091	chr5	96875939	96919716	8.48085e-30
rs2927608	chr5_96916728_G_A_b38	ERAP2	ENSG00000164308.16	NK_CD16POS	1.00655e-29	1.22998	0.0614792	chr5	96916728	0.41573	chr5	96875939	96919716	1.78763e-26
rs2927608	chr5_96916728_G_A_b38	ERAP2	ENSG00000164308.16	CD4_N_STIM	3.95617e-28	1.21312	0.064128	chr5	96916728	0.409091	chr5	96875939	96919716	6.58703e-25
rs2927608	chr5_96916728_G_A_b38	ERAP2	ENSG00000164308.16	TREG_NAIVE	2.14442e-29	1.31555	0.0659897	chr5	96916728	0.409091	chr5	96875939	96919716	3.72915e-26
rs2927608	chr5_96916728_G_A_b38	ERAP2	ENSG00000164308.16	NONCLASSICAL_MONOCYTES	4.50373e-33	1.3477	0.058947	chr5	96916728	0.410112	chr5	96875939	96919716	7.33207e-30
rs2517910	chr6_29720724_A_C_b38	HCG4P11	ENSG00000225864.1	B_NAIVE	9.92817e-07	0.943293	0.174819	chr6	29720724	0.241573	chr6	29723001	29723939	0.000343117
rs165256	chr6_30018907_T_C_b38	HCG4P11	ENSG00000225864.1	TREG_MEMORY	0.000167683	-0.776995	0.194508	chr6	30018907	0.210227	chr6	29723001	29723939	0.0190006
rs1611284	chr6_29763071_G_A_b38	HCG4P11	ENSG00000225864.1	CLASSICAL_MONOCYTES	0.000168281	-0.590806	0.148207	chr6	29763071	0.355556	chr6	29723001	29723939	0.021553
rs2517714	chr6_29950104_C_T_b38	HCG4P11	ENSG00000225864.1	CLASSICAL_MONOCYTES	4.83958e-05	-0.65561	0.150896	chr6	29950104	0.377778	chr6	29723001	29723939	0.00732536
rs2517910	chr6_29720724_A_C_b38	HCG4P11	ENSG00000225864.1	CD8_NAIVE	0.000236001	0.825728	0.212105	chr6	29720724	0.238636	chr6	29723001	29723939	0.0313214
rs2517714	chr6_29950104_C_T_b38	HCG4P11	ENSG00000225864.1	CD8_NAIVE	0.000152932	0.669886	0.166563	chr6	29950104	0.380682	chr6	29723001	29723939	0.0271608
rs210142	chr6_33579060_T_C_b38	HCG4P11	ENSG00000225864.1	CD8_NAIVE	0.000473971	0.678693	0.184371	chr6	33579060	0.261364	chr6	29723001	29723939	0.0443038
rs1736913	chr6_29736623_T_C_b38	HLA-F-AS1	ENSG00000214922.9	TH17	3.41093e-05	0.543371	0.12175	chr6	29736623	0.436047	chr6	29735028	29748993	0.00736762
rs1611284	chr6_29763071_G_A_b38	HLA-F-AS1	ENSG00000214922.9	TH17	2.36699e-05	0.621689	0.136167	chr6	29763071	0.354651	chr6	29735028	29748993	0.00584309
rs1736913	chr6_29736623_T_C_b38	HLA-F-AS1	ENSG00000214922.9	TH1	2.14609e-07	0.721591	0.122715	chr6	29736623	0.432099	chr6	29735028	29748993	0.000120181
rs1611284	chr6_29763071_G_A_b38	HLA-F-AS1	ENSG00000214922.9	TH1	1.11251e-06	0.744809	0.136879	chr6	29763071	0.358025	chr6	29735028	29748993	0.000311503
rs1610586	chr6_29708539_T_C_b38	HLA-F-AS1	ENSG00000214922.9	TREG_MEMORY	0.000247649	0.555155	0.143134	chr6	29708539	0.363636	chr6	29735028	29748993	0.0264111
rs1736913	chr6_29736623_T_C_b38	HLA-F-AS1	ENSG00000214922.9	TREG_MEMORY	4.932e-08	0.681968	0.110533	chr6	29736623	0.426136	chr6	29735028	29748993	2.98057e-05
rs1611284	chr6_29763071_G_A_b38	HLA-F-AS1	ENSG00000214922.9	TREG_MEMORY	2.019e-06	0.717157	0.137423	chr6	29763071	0.357955	chr6	29735028	29748993	0.000522921
rs1736913	chr6_29736623_T_C_b38	HLA-F-AS1	ENSG00000214922.9	TFH	5.50651e-07	0.684111	0.123112	chr6	29736623	0.426136	chr6	29735028	29748993	0.000244489
rs1610586	chr6_29708539_T_C_b38	HLA-F-AS1	ENSG00000214922.9	CLASSICAL_MONOCYTES	6.65947e-05	0.68452	0.160897	chr6	29708539	0.361111	chr6	29735028	29748993	0.00924002
rs1736913	chr6_29736623_T_C_b38	HLA-F-AS1	ENSG00000214922.9	CLASSICAL_MONOCYTES	6.24165e-09	0.851851	0.127998	chr6	29736623	0.427778	chr6	29735028	29748993	1.73206e-06
rs1611284	chr6_29763071_G_A_b38	HLA-F-AS1	ENSG00000214922.9	CD4_NAIVE	6.30314e-05	0.563246	0.131495	chr6	29763071	0.362069	chr6	29735028	29748993	0.0113456
rs1736913	chr6_29736623_T_C_b38	HLA-F-AS1	ENSG00000214922.9	TH1_17	1.55017e-05	0.585136	0.125103	chr6	29736623	0.431034	chr6	29735028	29748993	0.00364289
rs1611284	chr6_29763071_G_A_b38	HLA-F-AS1	ENSG00000214922.9	TH1_17	1.94299e-07	0.656746	0.112569	chr6	29763071	0.362069	chr6	29735028	29748993	7.99056e-05
rs1736913	chr6_29736623_T_C_b38	HLA-F-AS1	ENSG00000214922.9	TH2	2.28476e-07	0.689034	0.118949	chr6	29736623	0.431034	chr6	29735028	29748993	0.000101443
rs1611284	chr6_29763071_G_A_b38	HLA-F-AS1	ENSG00000214922.9	TH2	4.77299e-05	0.622388	0.14266	chr6	29763071	0.350575	chr6	29735028	29748993	0.0121098
rs1736913	chr6_29736623_T_C_b38	HLA-F-AS1	ENSG00000214922.9	CD8_NAIVE	0.000196077	0.507203	0.128461	chr6	29736623	0.426136	chr6	29735028	29748993	0.0313214
rs1736913	chr6_29736623_T_C_b38	HLA-F-AS1	ENSG00000214922.9	NK_CD16POS	3.77376e-07	0.771709	0.136719	chr6	29736623	0.421348	chr6	29735028	29748993	9.57457e-05
rs1611284	chr6_29763071_G_A_b38	HLA-F-AS1	ENSG00000214922.9	NK_CD16POS	2.46991e-08	0.806824	0.127462	chr6	29763071	0.353933	chr6	29735028	29748993	8.77313e-06
rs1736913	chr6_29736623_T_C_b38	HLA-F-AS1	ENSG00000214922.9	TREG_NAIVE	6.11169e-05	0.549674	0.128201	chr6	29736623	0.426136	chr6	29735028	29748993	0.01906
rs1610586	chr6_29708539_T_C_b38	HLA-F-AS1	ENSG00000214922.9	NONCLASSICAL_MONOCYTES	0.000245089	0.58333	0.15041	chr6	29708539	0.365169	chr6	29735028	29748993	0.0306927
rs1736913	chr6_29736623_T_C_b38	HLA-F-AS1	ENSG00000214922.9	NONCLASSICAL_MONOCYTES	2.38177e-06	0.665822	0.128846	chr6	29736623	0.432584	chr6	29735028	29748993	0.000387752
rs1736913	chr6_29736623_T_C_b38	IFITM4P	ENSG00000235821.1	TH1	2.01258e-06	0.710215	0.134483	chr6	29736623	0.432099	chr6	29750729	29751148	0.000422643
rs1611284	chr6_29763071_G_A_b38	IFITM4P	ENSG00000235821.1	TH1	9.12739e-07	0.791267	0.144009	chr6	29763071	0.358025	chr6	29750729	29751148	0.00030668
rs1611284	chr6_29763071_G_A_b38	IFITM4P	ENSG00000235821.1	B_NAIVE	9.68845e-05	0.590362	0.14222	chr6	29763071	0.359551	chr6	29750729	29751148	0.0186018
rs1611284	chr6_29763071_G_A_b38	IFITM4P	ENSG00000235821.1	TREG_MEMORY	2.59785e-06	0.79592	0.154484	chr6	29763071	0.357955	chr6	29750729	29751148	0.000588737
rs2517714	chr6_29950104_C_T_b38	IFITM4P	ENSG00000235821.1	TREG_MEMORY	2.71659e-05	0.681088	0.15081	chr6	29950104	0.380682	chr6	29750729	29751148	0.00492517
rs1736913	chr6_29736623_T_C_b38	IFITM4P	ENSG00000235821.1	TFH	2.39103e-06	0.707653	0.13677	chr6	29736623	0.426136	chr6	29750729	29751148	0.000849295
rs1611284	chr6_29763071_G_A_b38	IFITM4P	ENSG00000235821.1	TH1_17	5.46204e-06	0.756472	0.152478	chr6	29763071	0.362069	chr6	29750729	29751148	0.00149751
rs2517714	chr6_29950104_C_T_b38	IFITM4P	ENSG00000235821.1	TH1_17	0.000223158	0.677853	0.173216	chr6	29950104	0.37931	chr6	29750729	29751148	0.0326229
rs1610586	chr6_29708539_T_C_b38	IFITM4P	ENSG00000235821.1	TH2	0.000226511	0.595435	0.152329	chr6	29708539	0.367816	chr6	29750729	29751148	0.0287345
rs1736913	chr6_29736623_T_C_b38	IFITM4P	ENSG00000235821.1	TH2	6.7254e-06	0.660947	0.134747	chr6	29736623	0.431034	chr6	29750729	29751148	0.00199072
rs1611284	chr6_29763071_G_A_b38	IFITM4P	ENSG00000235821.1	TH2	0.000288663	0.604909	0.157699	chr6	29763071	0.350575	chr6	29750729	29751148	0.0341777
rs1736913	chr6_29736623_T_C_b38	IFITM4P	ENSG00000235821.1	CD8_NAIVE	1.24055e-05	0.734196	0.155143	chr6	29736623	0.426136	chr6	29750729	29751148	0.00314746
rs1611284	chr6_29763071_G_A_b38	IFITM4P	ENSG00000235821.1	CD8_NAIVE	0.000341243	0.595134	0.15737	chr6	29763071	0.357955	chr6	29750729	29751148	0.037878
rs2517714	chr6_29950104_C_T_b38	IFITM4P	ENSG00000235821.1	CD8_NAIVE	0.000238182	0.623248	0.160207	chr6	29950104	0.380682	chr6	29750729	29751148	0.0313214
rs1736913	chr6_29736623_T_C_b38	IFITM4P	ENSG00000235821.1	NK_CD16POS	1.34824e-05	0.642056	0.136496	chr6	29736623	0.421348	chr6	29750729	29751148	0.00266052
rs1611284	chr6_29763071_G_A_b38	IFITM4P	ENSG00000235821.1	NK_CD16POS	3.86202e-10	0.834351	0.113527	chr6	29763071	0.353933	chr6	29750729	29751148	2.28632e-07
rs2517714	chr6_29950104_C_T_b38	IFITM4P	ENSG00000235821.1	NK_CD16POS	0.000193499	0.618913	0.15674	chr6	29950104	0.382022	chr6	29750729	29751148	0.0217703
rs1736913	chr6_29736623_T_C_b38	IFITM4P	ENSG00000235821.1	TREG_NAIVE	1.23719e-05	0.617482	0.13046	chr6	29736623	0.426136	chr6	29750729	29751148	0.00717156
rs1611284	chr6_29763071_G_A_b38	IFITM4P	ENSG00000235821.1	TREG_NAIVE	0.000185528	0.566354	0.142848	chr6	29763071	0.357955	chr6	29750729	29751148	0.0403292
rs9265912	chr6_31345956_T_C_b38	HLA-T	ENSG00000231130.1	TREG_MEMORY	0.000334625	0.466762	0.123231	chr6	31345956	0.369318	chr6	29896654	29897786	0.0319302
rs2927608	chr5_96916728_G_A_b38	HLA-T	ENSG00000231130.1	TH2	0.000196658	-0.617827	0.156368	chr5	96916728	0.408046	chr6	29896654	29897786	0.0280389
rs204995	chr6_32186508_A_G_b38	HLA-T	ENSG00000231130.1	NK_CD16POS	7.56573e-05	-0.636364	0.150719	chr6	32186508	0.224719	chr6	29896654	29897786	0.0122152
rs1611284	chr6_29763071_G_A_b38	HLA-A	ENSG00000206503.12	TREG_MEMORY	0.000103069	-0.511147	0.123549	chr6	29763071	0.357955	chr6	29941260	29945884	0.0124576
rs1611284	chr6_29763071_G_A_b38	HLA-A	ENSG00000206503.12	TFH	3.26161e-05	-0.491695	0.110119	chr6	29763071	0.357955	chr6	29941260	29945884	0.00827518
rs1611284	chr6_29763071_G_A_b38	HLA-A	ENSG00000206503.12	TH1_17	0.000237979	-0.373299	0.0958638	chr6	29763071	0.362069	chr6	29941260	29945884	0.0326229
rs1611284	chr6_29763071_G_A_b38	HLA-A	ENSG00000206503.12	TH2	0.00040479	-0.403366	0.10806	chr6	29763071	0.350575	chr6	29941260	29945884	0.0449316
rs1736913	chr6_29736623_T_C_b38	HLA-A	ENSG00000206503.12	CD8_NAIVE	0.000112729	-0.460103	0.111916	chr6	29736623	0.426136	chr6	29941260	29945884	0.0222452
rs1611284	chr6_29763071_G_A_b38	HLA-A	ENSG00000206503.12	CD8_NAIVE	5.5299e-06	-0.512127	0.103439	chr6	29763071	0.357955	chr6	29941260	29945884	0.00163685
rs9260114	chr6_29942211_C_T_b38	HLA-A	ENSG00000206503.12	CD8_NAIVE	0.000246903	-0.470751	0.121344	chr6	29942211	0.323864	chr6	29941260	29945884	0.0313214
rs2517714	chr6_29950104_C_T_b38	HLA-A	ENSG00000206503.12	CD8_NAIVE	3.29363e-10	-0.677589	0.0914739	chr6	29950104	0.380682	chr6	29941260	29945884	1.94983e-07
rs9260114	chr6_29942211_C_T_b38	HLA-A	ENSG00000206503.12	NONCLASSICAL_MONOCYTES	1.14896e-06	0.553901	0.103379	chr6	29942211	0.325843	chr6	29941260	29945884	0.000207835
rs2517714	chr6_29950104_C_T_b38	HCG4P5	ENSG00000227766.1	TREG_MEMORY	0.000298052	0.408921	0.10697	chr6	29950104	0.380682	chr6	29942097	29943067	0.0300205
rs2517910	chr6_29720724_A_C_b38	PPP1R11	ENSG00000204619.7	TH17	0.000214059	-0.450429	0.114626	chr6	29720724	0.244186	chr6	30066709	30070265	0.0308245
rs165256	chr6_30018907_T_C_b38	PPP1R11	ENSG00000204619.7	CD4_N_STIM	9.09405e-06	0.426827	0.0886107	chr6	30018907	0.210227	chr6	30066709	30070265	0.00302832
rs614008	chr6_31873017_C_T_b38	PPP1R11	ENSG00000204619.7	TREG_NAIVE	5.026e-05	-0.484103	0.111461	chr6	31873017	0.357955	chr6	30066709	30070265	0.01906
rs9260114	chr6_29942211_C_T_b38	HLA-L	ENSG00000243753.5	TH1	4.76935e-05	0.869282	0.197756	chr6	29942211	0.314815	chr6	30259584	30266951	0.00890279
rs10807029	chr6_27605684_G_A_b38	HLA-L	ENSG00000243753.5	TH1_17	0.000420022	0.521691	0.140185	chr6	27605684	0.408046	chr6	30259584	30266951	0.0493526
rs9260114	chr6_29942211_C_T_b38	HLA-L	ENSG00000243753.5	TH1_17	0.000139505	0.647944	0.159876	chr6	29942211	0.321839	chr6	30259584	30266951	0.0229486
rs9260114	chr6_29942211_C_T_b38	HLA-L	ENSG00000243753.5	TREG_NAIVE	0.000171362	0.71647	0.179645	chr6	29942211	0.323864	chr6	30259584	30266951	0.0403292
rs1611284	chr6_29763071_G_A_b38	TRIM39	ENSG00000204599.14	TH1_17	2.15688e-05	0.326709	0.0712431	chr6	29763071	0.362069	chr6	30327259	30343729	0.00443509
rs2516719	chr6_30255943_C_T_b38	TRIM39	ENSG00000204599.14	NK_CD16POS	0.000442302	0.521121	0.140865	chr6	30255943	0.101124	chr6	30327259	30343729	0.0436405
rs2239704	chr6_31572364_A_C_b38	LTA	ENSG00000226979.8	CD8_N_STIM	1.89961e-06	-0.57786	0.110224	chr6	31572364	0.402299	chr6	31572054	31574324	0.000786437
rs2239704	chr6_31572364_A_C_b38	LST1	ENSG00000204482.10	TH17	0.000112767	0.431376	0.104717	chr6	31572364	0.406977	chr6	31586124	31588894	0.0200812
rs15574	chr6_31718720_G_A_b38	LST1	ENSG00000204482.10	TH1	0.000309648	0.410461	0.106968	chr6	31718720	0.351852	chr6	31586124	31588894	0.0472917
rs2239704	chr6_31572364_A_C_b38	LST1	ENSG00000204482.10	B_NAIVE	2.90851e-07	0.567806	0.0994257	chr6	31572364	0.404494	chr6	31586124	31588894	0.00016753
rs2239704	chr6_31572364_A_C_b38	LST1	ENSG00000204482.10	CD8_NAIVE	4.64887e-05	0.550183	0.126034	chr6	31572364	0.397727	chr6	31586124	31588894	0.0103205
rs2516719	chr6_30255943_C_T_b38	LST1	ENSG00000204482.10	NONCLASSICAL_MONOCYTES	0.000210591	0.430419	0.109702	chr6	30255943	0.101124	chr6	31586124	31588894	0.0285702
rs2239704	chr6_31572364_A_C_b38	LST1	ENSG00000204482.10	NONCLASSICAL_MONOCYTES	0.000271241	0.273133	0.0709827	chr6	31572364	0.398876	chr6	31586124	31588894	0.0315415
rs986475	chr6_31588932_A_G_b38	NCR3	ENSG00000204475.9	TH1	7.21703e-05	-0.780608	0.182602	chr6	31588932	0.135802	chr6	31588910	31592985	0.0121246
rs986475	chr6_31588932_A_G_b38	NCR3	ENSG00000204475.9	CD8_N_STIM	0.000129896	-0.789616	0.193829	chr6	31588932	0.143678	chr6	31588910	31592985	0.0358514
rs986475	chr6_31588932_A_G_b38	NCR3	ENSG00000204475.9	TFH	0.000221024	-0.770137	0.196834	chr6	31588932	0.142045	chr6	31588910	31592985	0.0445063
rs986475	chr6_31588932_A_G_b38	NCR3	ENSG00000204475.9	NK_CD16POS	5.24964e-10	-0.820165	0.112742	chr6	31588932	0.140449	chr6	31588910	31592985	2.33084e-07
rs9265912	chr6_31345956_T_C_b38	GPANK1	ENSG00000204438.10	TH17	0.000255861	-0.372839	0.0961946	chr6	31345956	0.360465	chr6	31661229	31666283	0.0340098
rs15574	chr6_31718720_G_A_b38	GPANK1	ENSG00000204438.10	TH17	0.000138234	-0.366729	0.0903366	chr6	31718720	0.319767	chr6	31661229	31666283	0.0217154
rs15574	chr6_31718720_G_A_b38	GPANK1	ENSG00000204438.10	TFH	0.000300065	-0.348921	0.0913228	chr6	31718720	0.329545	chr6	31661229	31666283	0.0445063
rs15574	chr6_31718720_G_A_b38	MSH5	ENSG00000204410.14	CLASSICAL_MONOCYTES	2.68903e-05	-0.460531	0.102139	chr6	31718720	0.322222	chr6	31739948	31762798	0.00497471
rs15574	chr6_31718720_G_A_b38	MSH5	ENSG00000204410.14	NONCLASSICAL_MONOCYTES	5.86045e-05	-0.463889	0.108005	chr6	31718720	0.325843	chr6	31739948	31762798	0.00867346
rs15574	chr6_31718720_G_A_b38	C6orf48	ENSG00000204387.12	CD8_NAIVE	0.000275111	-0.466815	0.121347	chr6	31718720	0.329545	chr6	31834608	31839766	0.0325731
rs15574	chr6_31718720_G_A_b38	C6orf48	ENSG00000204387.12	TREG_NAIVE	6.57618e-05	-0.502519	0.117778	chr6	31718720	0.329545	chr6	31834608	31839766	0.01906
rs444921	chr6_31964400_C_T_b38	SKIV2L	ENSG00000204351.11	TH17	9.77024e-23	0.865435	0.0569745	chr6	31964400	0.151163	chr6	31959111	31969755	8.44149e-20
rs444921	chr6_31964400_C_T_b38	SKIV2L	ENSG00000204351.11	TH1	2.77882e-26	0.984618	0.0525406	chr6	31964400	0.160494	chr6	31959111	31969755	2.33421e-23
rs444921	chr6_31964400_C_T_b38	SKIV2L	ENSG00000204351.11	B_NAIVE	6.74386e-21	0.735121	0.0538408	chr6	31964400	0.151685	chr6	31959111	31969755	5.8267e-18
rs444921	chr6_31964400_C_T_b38	SKIV2L	ENSG00000204351.11	CD8_N_STIM	4.84297e-14	0.518694	0.0539472	chr6	31964400	0.149425	chr6	31959111	31969755	4.00998e-11
rs444921	chr6_31964400_C_T_b38	SKIV2L	ENSG00000204351.11	TREG_MEMORY	1.77724e-23	1.04778	0.0677118	chr6	31964400	0.147727	chr6	31959111	31969755	1.61107e-20
rs444921	chr6_31964400_C_T_b38	SKIV2L	ENSG00000204351.11	TFH	2.19836e-21	0.967096	0.0687853	chr6	31964400	0.147727	chr6	31959111	31969755	1.95214e-18
rs444921	chr6_31964400_C_T_b38	SKIV2L	ENSG00000204351.11	CLASSICAL_MONOCYTES	6.2721e-22	0.904075	0.0635329	chr6	31964400	0.15	chr6	31959111	31969755	3.48101e-19
rs444921	chr6_31964400_C_T_b38	SKIV2L	ENSG00000204351.11	CD4_NAIVE	4.42606e-27	0.867134	0.0474689	chr6	31964400	0.149425	chr6	31959111	31969755	3.58511e-24
rs444921	chr6_31964400_C_T_b38	SKIV2L	ENSG00000204351.11	TH1_17	1.06426e-23	0.796122	0.0505468	chr6	31964400	0.149425	chr6	31959111	31969755	8.7535e-21
rs444921	chr6_31964400_C_T_b38	SKIV2L	ENSG00000204351.11	TH2	6.15916e-24	0.888702	0.0558251	chr6	31964400	0.149425	chr6	31959111	31969755	5.46933e-21
rs151231	chr16_28571528_A_G_b38	SKIV2L	ENSG00000204351.11	CD8_NAIVE	0.000524865	0.360388	0.0987477	chr16	28571528	0.471591	chr6	31959111	31969755	0.046608
rs444921	chr6_31964400_C_T_b38	SKIV2L	ENSG00000204351.11	CD8_NAIVE	6.70371e-27	1.06591	0.0593376	chr6	31964400	0.147727	chr6	31959111	31969755	5.95289e-24
rs444921	chr6_31964400_C_T_b38	SKIV2L	ENSG00000204351.11	NK_CD16POS	2.5393e-21	0.731272	0.052507	chr6	31964400	0.146067	chr6	31959111	31969755	2.2549e-18
rs444921	chr6_31964400_C_T_b38	SKIV2L	ENSG00000204351.11	CD4_N_STIM	4.48447e-12	0.466735	0.05518	chr6	31964400	0.147727	chr6	31959111	31969755	2.48888e-09
rs444921	chr6_31964400_C_T_b38	SKIV2L	ENSG00000204351.11	TREG_NAIVE	5.3013e-22	1.01254	0.0699774	chr6	31964400	0.147727	chr6	31959111	31969755	4.60948e-19
rs444921	chr6_31964400_C_T_b38	SKIV2L	ENSG00000204351.11	NONCLASSICAL_MONOCYTES	3.81781e-18	0.670041	0.0561216	chr6	31964400	0.151685	chr6	31959111	31969755	3.1077e-15
rs12153855	chr6_32107027_T_C_b38	EGFL8	ENSG00000241404.6	TFH	0.000366004	0.682171	0.181408	chr6	32107027	0.102273	chr6	32164583	32168211	0.0445063
rs13211318	chr6_32134903_A_C_b38	EGFL8	ENSG00000241404.6	TFH	0.000366004	0.682171	0.181408	chr6	32134903	0.102273	chr6	32164583	32168211	0.0445063
rs28752784	chr6_31322163_G_A_b38	EGFL8	ENSG00000241404.6	CD8_NAIVE	0.00036676	-0.361554	0.0961634	chr6	31322163	0.147727	chr6	32164583	32168211	0.0383156
rs9260114	chr6_29942211_C_T_b38	AGPAT1	ENSG00000204310.12	TFH	0.000356949	-0.386836	0.102662	chr6	29942211	0.323864	chr6	32168282	32178096	0.0445063
rs9260114	chr6_29942211_C_T_b38	AGPAT1	ENSG00000204310.12	TH1_17	4.99377e-05	-0.379478	0.0872387	chr6	29942211	0.321839	chr6	32168282	32178096	0.00912751
rs204995	chr6_32186508_A_G_b38	AGER	ENSG00000204305.13	TH17	1.77486e-09	0.547025	0.0778178	chr6	32186508	0.232558	chr6	32180968	32184324	8.15571e-07
rs204995	chr6_32186508_A_G_b38	AGER	ENSG00000204305.13	TH1	8.37787e-07	0.409048	0.0741352	chr6	32186508	0.222222	chr6	32180968	32184324	0.00030668
rs204995	chr6_32186508_A_G_b38	AGER	ENSG00000204305.13	TREG_MEMORY	9.20077e-05	0.462799	0.11098	chr6	32186508	0.227273	chr6	32180968	32184324	0.011915
rs204995	chr6_32186508_A_G_b38	AGER	ENSG00000204305.13	TFH	3.23091e-05	0.449008	0.100499	chr6	32186508	0.227273	chr6	32180968	32184324	0.00827518
rs204995	chr6_32186508_A_G_b38	AGER	ENSG00000204305.13	CLASSICAL_MONOCYTES	4.16427e-05	0.466824	0.10641	chr6	32186508	0.222222	chr6	32180968	32184324	0.00693351
rs204995	chr6_32186508_A_G_b38	AGER	ENSG00000204305.13	CD4_NAIVE	1.26106e-05	0.42195	0.0891328	chr6	32186508	0.229885	chr6	32180968	32184324	0.00510729
rs204995	chr6_32186508_A_G_b38	AGER	ENSG00000204305.13	TH1_17	5.55722e-07	0.423893	0.0761872	chr6	32186508	0.224138	chr6	32180968	32184324	0.000182833
rs204995	chr6_32186508_A_G_b38	AGER	ENSG00000204305.13	TH2	3.85361e-06	0.41475	0.0820514	chr6	32186508	0.229885	chr6	32180968	32184324	0.0013688
rs204995	chr6_32186508_A_G_b38	AGER	ENSG00000204305.13	CD8_NAIVE	3.15662e-08	0.523839	0.0833933	chr6	32186508	0.227273	chr6	32180968	32184324	1.40154e-05
rs204995	chr6_32186508_A_G_b38	AGER	ENSG00000204305.13	NK_CD16POS	0.000196129	0.331144	0.0839475	chr6	32186508	0.224719	chr6	32180968	32184324	0.0217703
rs204995	chr6_32186508_A_G_b38	AGER	ENSG00000204305.13	CD4_N_STIM	1.85015e-06	0.356789	0.0680692	chr6	32186508	0.227273	chr6	32180968	32184324	0.000770124
rs204995	chr6_32186508_A_G_b38	AGER	ENSG00000204305.13	TREG_NAIVE	0.000251082	0.395264	0.102018	chr6	32186508	0.227273	chr6	32180968	32184324	0.0436631
rs204995	chr6_32186508_A_G_b38	AGER	ENSG00000204305.13	NONCLASSICAL_MONOCYTES	6.57787e-08	0.483681	0.0794766	chr6	32186508	0.224719	chr6	32180968	32184324	1.52982e-05
rs204995	chr6_32186508_A_G_b38	PBX2	ENSG00000204304.11	TH2	0.000476251	-0.365954	0.0993714	chr6	32186508	0.229885	chr6	32184836	32190186	0.0497542
rs2517910	chr6_29720724_A_C_b38	HLA-DRB1	ENSG00000196126.11	CLASSICAL_MONOCYTES	0.000204596	0.696197	0.177209	chr6	29720724	0.238889	chr6	32578769	32589848	0.0243324
rs2736426	chr6_31777507_C_T_b38	HLA-DRB1	ENSG00000196126.11	TH2	0.000152631	-0.466654	0.115902	chr6	31777507	0.362069	chr6	32578769	32589848	0.0271073
rs12153855	chr6_32107027_T_C_b38	HLA-DQB2	ENSG00000232629.8	TH2	0.000140809	1.03601	0.255802	chr6	32107027	0.103448	chr6	32756098	32763534	0.0271073
rs13211318	chr6_32134903_A_C_b38	HLA-DQB2	ENSG00000232629.8	TH2	0.000140809	1.03601	0.255802	chr6	32134903	0.103448	chr6	32756098	32763534	0.0271073
rs12153855	chr6_32107027_T_C_b38	HLA-DQB2	ENSG00000232629.8	NK_CD16POS	0.000148696	0.803128	0.19947	chr6	32107027	0.101124	chr6	32756098	32763534	0.0188631
rs13211318	chr6_32134903_A_C_b38	HLA-DQB2	ENSG00000232629.8	NK_CD16POS	0.000148696	0.803128	0.19947	chr6	32134903	0.101124	chr6	32756098	32763534	0.0188631
rs2855448	chr6_33168798_C_T_b38	HSD17B8	ENSG00000204228.3	CD4_NAIVE	2.42544e-05	-0.52833	0.116036	chr6	33168798	0.229885	chr6	33204642	33206831	0.00634297
rs2855448	chr6_33168798_C_T_b38	HSD17B8	ENSG00000204228.3	CD4_N_STIM	0.000179795	-0.481183	0.121082	chr6	33168798	0.227273	chr6	33204642	33206831	0.0427656
rs210142	chr6_33579060_T_C_b38	BAK1	ENSG00000030110.12	TH17	1.8879e-09	-0.709929	0.101213	chr6	33579060	0.261628	chr6	33572547	33580293	8.15571e-07
rs210142	chr6_33579060_T_C_b38	BAK1	ENSG00000030110.12	TH1	1.6049e-06	-0.528885	0.0989969	chr6	33579060	0.265432	chr6	33572547	33580293	0.000385177
rs210142	chr6_33579060_T_C_b38	BAK1	ENSG00000030110.12	B_NAIVE	6.89765e-07	-0.420865	0.0766622	chr6	33579060	0.258427	chr6	33572547	33580293	0.000297979
rs210142	chr6_33579060_T_C_b38	BAK1	ENSG00000030110.12	CD8_N_STIM	5.10838e-09	-0.741185	0.109813	chr6	33579060	0.264368	chr6	33572547	33580293	2.81982e-06
rs210142	chr6_33579060_T_C_b38	BAK1	ENSG00000030110.12	TREG_MEMORY	9.05137e-08	-0.605673	0.10066	chr6	33579060	0.261364	chr6	33572547	33580293	4.10253e-05
rs210142	chr6_33579060_T_C_b38	BAK1	ENSG00000030110.12	TFH	1.34296e-07	-0.590032	0.0997132	chr6	33579060	0.261364	chr6	33572547	33580293	7.95031e-05
rs210142	chr6_33579060_T_C_b38	BAK1	ENSG00000030110.12	CLASSICAL_MONOCYTES	5.44333e-23	-1.01478	0.0679856	chr6	33579060	0.255556	chr6	33572547	33580293	4.53157e-20
rs210142	chr6_33579060_T_C_b38	BAK1	ENSG00000030110.12	CD4_NAIVE	3.66252e-07	-0.512879	0.0904308	chr6	33579060	0.258621	chr6	33572547	33580293	0.000197776
rs210142	chr6_33579060_T_C_b38	BAK1	ENSG00000030110.12	TH1_17	5.73546e-09	-0.623025	0.0927019	chr6	33579060	0.264368	chr6	33572547	33580293	3.14494e-06
rs210142	chr6_33579060_T_C_b38	BAK1	ENSG00000030110.12	TH2	1.33179e-09	-0.611597	0.0863509	chr6	33579060	0.258621	chr6	33572547	33580293	7.88419e-07
rs210142	chr6_33579060_T_C_b38	BAK1	ENSG00000030110.12	CD8_NAIVE	5.61035e-07	-0.527338	0.0949813	chr6	33579060	0.261364	chr6	33572547	33580293	0.000199279
rs210142	chr6_33579060_T_C_b38	BAK1	ENSG00000030110.12	NK_CD16POS	9.61638e-08	-0.445457	0.0743592	chr6	33579060	0.258427	chr6	33572547	33580293	2.84645e-05
rs210142	chr6_33579060_T_C_b38	BAK1	ENSG00000030110.12	CD4_N_STIM	1.65926e-17	-0.829694	0.071437	chr6	33579060	0.261364	chr6	33572547	33580293	1.38133e-14
rs210142	chr6_33579060_T_C_b38	BAK1	ENSG00000030110.12	TREG_NAIVE	0.000220679	-0.486394	0.124299	chr6	33579060	0.261364	chr6	33572547	33580293	0.0426401
rs210142	chr6_33579060_T_C_b38	BAK1	ENSG00000030110.12	NONCLASSICAL_MONOCYTES	1.11014e-14	-0.785394	0.0793008	chr6	33579060	0.258427	chr6	33572547	33580293	6.02438e-12
rs151174	chr16_28496748_C_T_b38	NPIPB7	ENSG00000233232.6	TREG_MEMORY	0.000356429	-0.688883	0.1828	chr16	28496748	0.244318	chr16	28456372	28471175	0.0323103
rs40834	chr16_28499072_C_T_b38	SGF29	ENSG00000176476.8	TH17	3.83761e-06	-0.328409	0.0648601	chr16	28499072	0.436047	chr16	28581055	28591790	0.00110523
rs231977	chr16_28530851_T_C_b38	SGF29	ENSG00000176476.8	TH17	0.000116211	-0.262825	0.0639381	chr16	28530851	0.47093	chr16	28581055	28591790	0.0200812
rs151231	chr16_28571528_A_G_b38	SGF29	ENSG00000176476.8	TH17	3.44681e-06	-0.315935	0.0620437	chr16	28571528	0.482558	chr16	28581055	28591790	0.00110523
rs40834	chr16_28499072_C_T_b38	SGF29	ENSG00000176476.8	B_NAIVE	1.9287e-06	-0.324648	0.0621581	chr16	28499072	0.421348	chr16	28581055	28591790	0.000555466
rs231977	chr16_28530851_T_C_b38	SGF29	ENSG00000176476.8	B_NAIVE	7.10152e-06	-0.308668	0.0632857	chr16	28530851	0.455056	chr16	28581055	28591790	0.00168787
rs151231	chr16_28571528_A_G_b38	SGF29	ENSG00000176476.8	B_NAIVE	7.8142e-06	-0.318242	0.0655948	chr16	28571528	0.466292	chr16	28581055	28591790	0.00168787
rs151174	chr16_28496748_C_T_b38	SGF29	ENSG00000176476.8	CD8_N_STIM	5.64839e-06	0.44457	0.0897728	chr16	28496748	0.247126	chr16	28581055	28591790	0.00187075
rs151174	chr16_28496748_C_T_b38	SGF29	ENSG00000176476.8	TREG_MEMORY	5.06443e-05	-0.472085	0.108748	chr16	28496748	0.244318	chr16	28581055	28591790	0.00706294
rs40834	chr16_28499072_C_T_b38	SGF29	ENSG00000176476.8	TREG_MEMORY	7.3428e-07	-0.485868	0.0886217	chr16	28499072	0.431818	chr16	28581055	28591790	0.000221875
rs231977	chr16_28530851_T_C_b38	SGF29	ENSG00000176476.8	TREG_MEMORY	5.77578e-07	-0.460059	0.0829755	chr16	28530851	0.460227	chr16	28581055	28591790	0.00020943
rs151231	chr16_28571528_A_G_b38	SGF29	ENSG00000176476.8	TREG_MEMORY	4.26614e-06	-0.428156	0.0852828	chr16	28571528	0.471591	chr16	28581055	28591790	0.000859391
rs151174	chr16_28496748_C_T_b38	SGF29	ENSG00000176476.8	TFH	0.000258718	-0.409896	0.106041	chr16	28496748	0.244318	chr16	28581055	28591790	0.0445063
rs40834	chr16_28499072_C_T_b38	SGF29	ENSG00000176476.8	TFH	0.000263078	-0.368363	0.0954206	chr16	28499072	0.431818	chr16	28581055	28591790	0.0445063
rs151231	chr16_28571528_A_G_b38	SGF29	ENSG00000176476.8	TFH	0.000375898	-0.341723	0.0910708	chr16	28571528	0.471591	chr16	28581055	28591790	0.0445063
rs151174	chr16_28496748_C_T_b38	SGF29	ENSG00000176476.8	CLASSICAL_MONOCYTES	5.47992e-06	-0.544656	0.110246	chr16	28496748	0.238889	chr16	28581055	28591790	0.00114051
rs40834	chr16_28499072_C_T_b38	SGF29	ENSG00000176476.8	CLASSICAL_MONOCYTES	7.05345e-07	-0.490866	0.0896459	chr16	28499072	0.422222	chr16	28581055	28591790	0.000167771
rs231977	chr16_28530851_T_C_b38	SGF29	ENSG00000176476.8	CLASSICAL_MONOCYTES	4.88411e-09	-0.520328	0.0774863	chr16	28530851	0.45	chr16	28581055	28591790	1.73206e-06
rs151231	chr16_28571528_A_G_b38	SGF29	ENSG00000176476.8	CLASSICAL_MONOCYTES	5.69532e-09	-0.531655	0.0796179	chr16	28571528	0.461111	chr16	28581055	28591790	1.73206e-06
rs40834	chr16_28499072_C_T_b38	SGF29	ENSG00000176476.8	CD4_NAIVE	2.86844e-05	-0.230489	0.051148	chr16	28499072	0.436782	chr16	28581055	28591790	0.00634297
rs231977	chr16_28530851_T_C_b38	SGF29	ENSG00000176476.8	CD4_NAIVE	1.67618e-05	-0.240852	0.0517332	chr16	28530851	0.465517	chr16	28581055	28591790	0.00543084
rs151231	chr16_28571528_A_G_b38	SGF29	ENSG00000176476.8	CD4_NAIVE	3.13233e-05	-0.236733	0.0528227	chr16	28571528	0.477011	chr16	28581055	28591790	0.00634297
rs231977	chr16_28530851_T_C_b38	SGF29	ENSG00000176476.8	TH1_17	0.000367132	-0.231053	0.0614062	chr16	28530851	0.465517	chr16	28581055	28591790	0.0464563
rs231977	chr16_28530851_T_C_b38	SGF29	ENSG00000176476.8	TH2	0.00020524	-0.248522	0.0631028	chr16	28530851	0.465517	chr16	28581055	28591790	0.0280389
rs151231	chr16_28571528_A_G_b38	SGF29	ENSG00000176476.8	TH2	0.000172872	-0.258473	0.0647892	chr16	28571528	0.477011	chr16	28581055	28591790	0.0279109
rs151231	chr16_28571528_A_G_b38	SGF29	ENSG00000176476.8	CD8_NAIVE	0.000431555	-0.230695	0.0621822	chr16	28571528	0.471591	chr16	28581055	28591790	0.0425801
rs151174	chr16_28496748_C_T_b38	SGF29	ENSG00000176476.8	NK_CD16POS	0.000274978	-0.261234	0.067963	chr16	28496748	0.241573	chr16	28581055	28591790	0.0287271
rs40834	chr16_28499072_C_T_b38	SGF29	ENSG00000176476.8	NK_CD16POS	8.9476e-05	-0.242393	0.0580723	chr16	28499072	0.426966	chr16	28581055	28591790	0.0132425
rs231977	chr16_28530851_T_C_b38	SGF29	ENSG00000176476.8	NK_CD16POS	1.61916e-05	-0.256877	0.0551974	chr16	28530851	0.455056	chr16	28581055	28591790	0.00287562
rs151231	chr16_28571528_A_G_b38	SGF29	ENSG00000176476.8	NK_CD16POS	1.81469e-06	-0.294072	0.0561325	chr16	28571528	0.466292	chr16	28581055	28591790	0.000402861
rs151174	chr16_28496748_C_T_b38	SGF29	ENSG00000176476.8	CD4_N_STIM	4.2091e-05	0.30924	0.0703869	chr16	28496748	0.244318	chr16	28581055	28591790	0.0116803
rs151174	chr16_28496748_C_T_b38	SGF29	ENSG00000176476.8	NONCLASSICAL_MONOCYTES	7.93483e-08	-0.429508	0.0711241	chr16	28496748	0.241573	chr16	28581055	28591790	1.61474e-05
rs40834	chr16_28499072_C_T_b38	SGF29	ENSG00000176476.8	NONCLASSICAL_MONOCYTES	4.16921e-09	-0.405547	0.0599157	chr16	28499072	0.426966	chr16	28581055	28591790	1.13125e-06
rs231977	chr16_28530851_T_C_b38	SGF29	ENSG00000176476.8	NONCLASSICAL_MONOCYTES	1.3861e-09	-0.39847	0.0566165	chr16	28530851	0.44382	chr16	28581055	28591790	5.64142e-07
rs151231	chr16_28571528_A_G_b38	SGF29	ENSG00000176476.8	NONCLASSICAL_MONOCYTES	3.70448e-09	-0.393212	0.0578458	chr16	28571528	0.455056	chr16	28581055	28591790	1.13125e-06

## Sheet: ST_9
Table S9. Harmonized data used for two-sample MR analyisis.
Note: This table only shows harmonized data for rows that correspond to statistically significant causal genes. The purpose of data harmonization in the context of two-sample MR is to ensure that the data from different sources is compatible and can be effectively combined and analyzed. Harmonization ensures that the effect directions are consistent between the exposure (spatial eQTL interactions…
SNP	effect_allele.exposure	other_allele.exposure	effect_allele.outcome	other_allele.outcome	beta.exposure	beta.outcome	eaf.exposure	eaf.outcome	remove	palindromic	ambiguous	id.outcome	pval.outcome	se.outcome	outcome	mr_keep.outcome	pval_origin.outcome	data_source.outcome	se.exposure	pval.exposure	exposure	mr_keep.exposure	pval_origin.exposure	id.exposure	data_source.exposure	action	mr_keep
rs10484565	A	G	A	G	-0.28826	-0.0761309	0.0723881	0.0774718	FALSE	FALSE	FALSE	R0bGz1	0.158709	0.0540155	outcome	TRUE	reported	textfile	0.049816	1.15833e-08	HLA-DOB	TRUE	reported	fHBCb8	textfile	2	TRUE
rs4148876	A	G	A	G	0.968278	-0.313643	0.069403	0.0634939	FALSE	FALSE	FALSE	R0bGz1	2.2889e-07	0.0606168	outcome	TRUE	reported	textfile	0.0375898	4.1867e-99	HLA-DOB	TRUE	reported	fHBCb8	textfile	2	TRUE
rs9276856	T	C	T	C	-0.118424	0.033351	0.250746	0.278973	FALSE	FALSE	FALSE	R0bGz1	0.30326	0.0323963	outcome	TRUE	reported	textfile	0.0302905	0.000102995	HLA-DOB	TRUE	reported	fHBCb8	textfile	2	TRUE
rs10807029	A	G	A	G	-0.0553492	-0.145349	0.38806	0.39067	FALSE	FALSE	FALSE	R0bGz1	1.2669e-06	0.0300006	outcome	TRUE	reported	textfile	0.0138784	7.48076e-05	HSP90AB1	TRUE	reported	uArlIh	textfile	2	TRUE
rs12153855	C	T	C	T	0.334803	-0.396516	0.108955	0.0953507	FALSE	FALSE	FALSE	R0bGz1	6.70755e-16	0.0490998	outcome	TRUE	reported	textfile	0.0469821	2.97159e-12	FKBPL	TRUE	reported	kGiuF3	textfile	2	TRUE
rs1233665	C	T	C	T	0.249587	-0.201019	0.192537	0.130901	FALSE	FALSE	FALSE	R0bGz1	2.50199e-06	0.0426977	outcome	TRUE	reported	textfile	0.0592124	2.88118e-05	AL022393.9	TRUE	reported	5oN34N	textfile	2	TRUE
rs12529313	G	A	G	A	0.116098	0.252086	0.183582	0.167466	FALSE	FALSE	FALSE	R0bGz1	7.36278e-11	0.0387046	outcome	TRUE	reported	textfile	0.0157979	6.56479e-13	PSMB8	TRUE	reported	LWhVIT	textfile	2	TRUE
rs1265941	C	A	C	A	0.130731	0.0711998	0.0671642	0.0637509	FALSE	FALSE	FALSE	R0bGz1	0.236199	0.0601075	outcome	TRUE	reported	textfile	0.0384293	0.000713804	SKIV2L	TRUE	reported	SvwvAD	textfile	2	TRUE
rs444921	T	C	T	C	0.446225	-0.201176	0.14403	0.125256	FALSE	FALSE	FALSE	R0bGz1	4.79543e-06	0.0439868	outcome	TRUE	reported	textfile	0.0239235	1.39724e-61	SKIV2L	TRUE	reported	SvwvAD	textfile	2	TRUE
rs9276915	A	G	A	G	-0.0848805	0.0228108	0.242537	0.27509	FALSE	FALSE	FALSE	R0bGz1	0.481853	0.0324328	outcome	TRUE	reported	textfile	0.0220543	0.000131478	SKIV2L	TRUE	reported	SvwvAD	textfile	2	TRUE
rs13186299	C	G	C	G	0.169863	-0.297629	0.128358	0.143702	FALSE	TRUE	FALSE	R0bGz1	7.9592e-11	0.0457795	outcome	TRUE	reported	textfile	0.025299	4.39066e-11	IL6ST	TRUE	reported	M60G91	textfile	2	TRUE
rs13211318	C	A	C	A	0.125529	-0.399222	0.108955	0.0950924	FALSE	FALSE	FALSE	R0bGz1	5.30624e-16	0.0492606	outcome	TRUE	reported	textfile	0.0270918	4.41325e-06	GPANK1	TRUE	reported	DuwA79	textfile	2	TRUE
rs140091914	A	G	A	G	-0.200981	0.453831	0.131343	0.128019	FALSE	FALSE	FALSE	R0bGz1	1.121e-25	0.0433237	outcome	TRUE	reported	textfile	0.0197038	1.22894e-22	C6orf48	TRUE	reported	nIbQ2f	textfile	2	TRUE
rs151174	T	C	T	C	-0.426211	0.145068	0.374627	0.418315	FALSE	FALSE	FALSE	R0bGz1	7.98898e-07	0.0293919	outcome	TRUE	reported	textfile	0.0408559	1.58066e-23	NPIPB7	TRUE	reported	lZFymd	textfile	2	TRUE
rs151231	G	A	G	A	-0.269923	0.172572	0.483582	0.448896	FALSE	FALSE	FALSE	R0bGz1	4.81896e-08	0.0316188	outcome	TRUE	reported	textfile	0.0214117	1.72207e-32	SGF29	TRUE	reported	EBzMdM	textfile	2	TRUE
rs15574	A	G	A	G	-0.114114	0.261253	0.256716	0.204784	FALSE	FALSE	FALSE	R0bGz1	2.29616e-13	0.0356401	outcome	TRUE	reported	textfile	0.0255705	9.66764e-06	DXO	TRUE	reported	bwbeDc	textfile	2	TRUE
rs1610586	C	T	C	T	0.362777	0.218092	0.280597	0.275897	FALSE	FALSE	FALSE	R0bGz1	1.94483e-11	0.032502	outcome	TRUE	reported	textfile	0.0446409	2.53102e-15	HCG9	TRUE	reported	EnyleY	textfile	2	TRUE
rs1611284	A	G	A	G	-0.188694	0.162767	0.414925	0.412467	FALSE	FALSE	FALSE	R0bGz1	3.12347e-08	0.0294103	outcome	TRUE	reported	textfile	0.0408729	4.77419e-06	MOG	TRUE	reported	vtzlIS	textfile	2	TRUE
rs165256	C	T	C	T	0.137171	-0.249491	0.15	0.117262	FALSE	FALSE	FALSE	R0bGz1	3.43903e-08	0.0452183	outcome	TRUE	reported	textfile	0.0196525	7.85263e-12	PPP1R11	TRUE	reported	N2Rfvf	textfile	2	TRUE
rs1736913	C	T	C	T	0.364807	0.219933	0.350746	0.313801	FALSE	FALSE	FALSE	R0bGz1	1.91186e-12	0.0312371	outcome	TRUE	reported	textfile	0.0353849	4.6833e-23	HLA-F-AS1	TRUE	reported	JwCsrx	textfile	2	TRUE
rs204898	T	C	T	C	-0.189544	-0.477879	0.0507463	0.0481651	FALSE	FALSE	FALSE	R0bGz1	1.7012e-12	0.0677169	outcome	TRUE	reported	textfile	0.0437234	1.70872e-05	EGFL8	TRUE	reported	fwLFsL	textfile	2	TRUE
rs204995	G	A	G	A	0.145787	-0.280192	0.234328	0.244989	FALSE	FALSE	FALSE	R0bGz1	9.80386e-17	0.033729	outcome	TRUE	reported	textfile	0.0216182	3.63607e-11	AGER	TRUE	reported	bKbrBN	textfile	2	TRUE
rs204995	G	A	G	A	-0.135199	-0.280192	0.234328	0.244989	FALSE	FALSE	FALSE	R0bGz1	9.80386e-17	0.033729	outcome	TRUE	reported	textfile	0.0171995	1.7797e-14	PBX2	TRUE	reported	zHzodP	textfile	2	TRUE
rs210142	C	T	C	T	-0.616568	0.153986	0.308955	0.289452	FALSE	FALSE	FALSE	R0bGz1	1.40799e-06	0.0319216	outcome	TRUE	reported	textfile	0.0207042	2.45889e-120	BAK1	TRUE	reported	qZTLkS	textfile	2	TRUE
rs2239704	C	A	C	A	-0.0643462	0.165186	0.378358	0.367182	FALSE	FALSE	FALSE	R0bGz1	3.80716e-08	0.0300362	outcome	TRUE	reported	textfile	0.0169432	0.000160864	LTB	TRUE	reported	bEbohw	textfile	2	TRUE
rs231977	C	T	C	T	-0.158315	0.172624	0.481343	0.447053	FALSE	FALSE	FALSE	R0bGz1	4.10649e-08	0.031465	outcome	TRUE	reported	textfile	0.0193481	1.66924e-15	CLN3	TRUE	reported	lDdsPu	textfile	2	TRUE
rs2395153	G	C	G	C	0.0791669	-0.182933	0.368657	0.409942	FALSE	TRUE	FALSE	R0bGz1	4.38968e-10	0.0293186	outcome	TRUE	reported	textfile	0.0192125	4.31051e-05	MSH5	TRUE	reported	2jJIhY	textfile	2	TRUE
rs7764682	T	C	T	C	-0.154353	0.477712	0.0985075	0.100482	FALSE	FALSE	FALSE	R0bGz1	2.21386e-23	0.0479489	outcome	TRUE	reported	textfile	0.0308941	7.68074e-07	MSH5	TRUE	reported	2jJIhY	textfile	2	TRUE
rs2516719	T	C	T	C	0.184499	-0.32829	0.0925373	0.0622262	FALSE	FALSE	FALSE	R0bGz1	4.98281e-08	0.0602154	outcome	TRUE	reported	textfile	0.0335822	5.81422e-08	TRIM39	TRUE	reported	pa3Rw9	textfile	2	TRUE
rs2517714	T	C	T	C	0.391942	0.249124	0.405224	0.434342	FALSE	FALSE	FALSE	R0bGz1	1.5563e-17	0.02923	outcome	TRUE	reported	textfile	0.0316517	1.59974e-31	HCG4P5	TRUE	reported	SHWly9	textfile	2	TRUE
rs2517910	C	A	C	A	-0.308259	0.18676	0.427612	0.429595	FALSE	FALSE	FALSE	R0bGz1	1.55479e-10	0.0291817	outcome	TRUE	reported	textfile	0.0490255	6.2051e-10	HCG4P11	TRUE	reported	4XBeut	textfile	2	TRUE
rs2621331	T	C	T	C	0.187493	0.424094	0.352985	0.363895	FALSE	FALSE	FALSE	R0bGz1	1.89865e-45	0.0299738	outcome	TRUE	reported	textfile	0.0468384	7.03836e-05	HLA-DQB2	TRUE	reported	DQLXSC	textfile	2	TRUE
rs2736426	T	C	T	C	-0.217625	0.159776	0.455224	0.45315	FALSE	FALSE	FALSE	R0bGz1	4.23778e-08	0.0291529	outcome	TRUE	reported	textfile	0.0408524	1.41352e-07	VWA7	TRUE	reported	A7IQff	textfile	2	TRUE
rs2844472	G	A	G	A	0.125503	0.156959	0.35	0.363981	FALSE	FALSE	FALSE	R0bGz1	2.21949e-07	0.0303013	outcome	TRUE	reported	textfile	0.0118313	3.27683e-24	PRRC2A	TRUE	reported	YFW5Nc	textfile	2	TRUE
rs2853915	C	A	C	A	0.0826446	0.193581	0.407463	0.437668	FALSE	FALSE	FALSE	R0bGz1	2.36691e-10	0.0305553	outcome	TRUE	reported	textfile	0.0240686	0.000636423	SLC25A20	TRUE	reported	XkCKMM	textfile	2	TRUE
rs2855448	T	C	T	C	-0.101059	0.142882	0.334328	0.348662	FALSE	FALSE	FALSE	R0bGz1	3.12505e-06	0.0306454	outcome	TRUE	reported	textfile	0.0201649	7.11223e-07	HSD17B8	TRUE	reported	Mq0U0n	textfile	2	TRUE
rs2857697	T	C	T	C	-0.05533	0.144974	0.373134	0.379984	FALSE	FALSE	FALSE	R0bGz1	1.38041e-06	0.0300289	outcome	TRUE	reported	textfile	0.011774	3.23981e-06	CSNK2B	TRUE	reported	aWs86S	textfile	2	TRUE
rs28752784	A	G	A	G	-0.0535797	0.289687	0.141791	0.128593	FALSE	FALSE	FALSE	R0bGz1	3.54771e-11	0.0437471	outcome	TRUE	reported	textfile	0.0130312	4.47626e-05	GPSM3	TRUE	reported	6nu1H5	textfile	2	TRUE
rs2927608	A	G	A	G	0.993638	0.136891	0.417164	0.456446	FALSE	FALSE	FALSE	R0bGz1	2.82757e-06	0.0292317	outcome	TRUE	reported	textfile	0.017056	1e-200	ERAP2	TRUE	reported	daPLfE	textfile	2	TRUE
rs7725881	A	C	A	C	0.294623	0.0256349	0.0970149	0.0420625	FALSE	FALSE	FALSE	R0bGz1	0.722623	0.0722196	outcome	TRUE	reported	textfile	0.0796243	0.000235268	ERAP2	TRUE	reported	daPLfE	textfile	2	TRUE
rs3093553	G	T	G	T	-0.189423	-0.280367	0.069403	0.060451	FALSE	FALSE	FALSE	R0bGz1	3.41493e-06	0.0603701	outcome	TRUE	reported	textfile	0.0304704	9.51568e-10	LST1	TRUE	reported	uTK8Wi	textfile	2	TRUE
rs3130285	C	T	C	T	-0.0754771	0.384036	0.124627	0.131255	FALSE	FALSE	FALSE	R0bGz1	3.70945e-19	0.0429316	outcome	TRUE	reported	textfile	0.0179971	3.15678e-05	EHMT2	TRUE	reported	QkJWFg	textfile	2	TRUE
rs3134950	A	C	A	C	-0.047802	0.14576	0.373881	0.362761	FALSE	FALSE	FALSE	R0bGz1	1.39525e-06	0.030205	outcome	TRUE	reported	textfile	0.0136978	0.000518933	AGPAT1	TRUE	reported	7AVGxh	textfile	2	TRUE
rs3219190	C	T	C	T	0.166686	0.396718	0.126119	0.138797	FALSE	FALSE	FALSE	R0bGz1	6.08872e-21	0.042256	outcome	TRUE	reported	textfile	0.0345857	1.82558e-06	LTA	TRUE	reported	X8XfY5	textfile	2	TRUE
rs3763348	T	C	T	C	0.114943	0.170236	0.428358	0.445368	FALSE	FALSE	FALSE	R0bGz1	5.63733e-09	0.0292141	outcome	TRUE	reported	textfile	0.01533	2.34246e-13	TAP1	TRUE	reported	nRImpa	textfile	2	TRUE
rs40834	T	C	T	C	-0.0511018	0.13748	0.455224	0.470512	FALSE	FALSE	FALSE	R0bGz1	2.04074e-06	0.0289472	outcome	TRUE	reported	textfile	0.0138243	0.000238592	APOBR	TRUE	reported	iARQx0	textfile	2	TRUE
rs4711185	A	G	A	G	-0.190529	0.142503	0.343284	0.380603	FALSE	FALSE	FALSE	R0bGz1	1.87025e-06	0.029894	outcome	TRUE	reported	textfile	0.0510729	0.000209213	HLA-DQA2	TRUE	reported	HzE8Hk	textfile	2	TRUE
rs4959098	C	A	C	A	0.387893	0.272794	0.369403	0.38685	FALSE	FALSE	FALSE	R0bGz1	1.01731e-19	0.03002	outcome	TRUE	reported	textfile	0.0506242	7.37605e-14	HLA-DQA2	TRUE	reported	HzE8Hk	textfile	2	TRUE
rs9271589	A	G	A	G	1.0727	-0.586269	0.305224	0.314325	FALSE	FALSE	FALSE	R0bGz1	5.83759e-59	0.0362097	outcome	TRUE	reported	textfile	0.0339277	7.10465e-130	HLA-DQA2	TRUE	reported	HzE8Hk	textfile	2	TRUE
rs565599	C	G	C	G	-0.0973228	0.382213	0.18806	0.15066	FALSE	TRUE	FALSE	R0bGz1	3.02305e-21	0.0403948	outcome	TRUE	reported	textfile	0.0240621	5.92423e-05	HSPA1B	TRUE	reported	e2jULr	textfile	2	TRUE
rs614008	T	C	T	C	0.0630107	0.278369	0.359702	0.395798	FALSE	FALSE	FALSE	R0bGz1	8.43436e-21	0.0297592	outcome	TRUE	reported	textfile	0.0163511	0.000128935	ABHD16A	TRUE	reported	BMiYx3	textfile	2	TRUE
rs760294	A	C	A	C	0.0993033	0.321591	0.114925	0.113418	FALSE	FALSE	FALSE	R0bGz1	3.30293e-12	0.0461779	outcome	TRUE	reported	textfile	0.0289952	0.0006572	LY6G6F	TRUE	reported	q1urj6	textfile	2	TRUE
rs9260114	T	C	T	C	0.149455	0.202689	0.320896	0.381574	FALSE	FALSE	FALSE	R0bGz1	1.01162e-11	0.029786	outcome	TRUE	reported	textfile	0.0305808	1.31415e-06	HLA-A	TRUE	reported	s4nGXe	textfile	2	TRUE
rs9265912	C	T	C	T	0.824626	0.251911	0.343284	0.363293	FALSE	FALSE	FALSE	R0bGz1	1.5043e-16	0.0305119	outcome	TRUE	reported	textfile	0.0439384	3.55029e-62	HLA-L	TRUE	reported	A6j1vg	textfile	2	TRUE
rs9265961	G	A	G	A	0.492127	0.175459	0.268657	0.314355	FALSE	FALSE	FALSE	R0bGz1	2.35275e-08	0.0314226	outcome	TRUE	reported	textfile	0.0574086	8.61059e-17	HLA-T	TRUE	reported	wR4dai	textfile	2	TRUE
rs9266639	T	C	T	C	0.0886919	0.281028	0.241791	0.290317	FALSE	FALSE	FALSE	R0bGz1	8.16741e-19	0.0317269	outcome	TRUE	reported	textfile	0.0208728	2.4873e-05	PPP1R10	TRUE	reported	MxYGG7	textfile	2	TRUE
rs9267551	G	C	G	C	-0.134431	0.347855	0.121642	0.133668	FALSE	TRUE	FALSE	R0bGz1	2.70824e-16	0.0424957	outcome	TRUE	reported	textfile	0.0224813	3.84028e-09	DDAH2	TRUE	reported	4i9sik	textfile	2	TRUE
rs929156	A	G	A	G	-0.160914	0.23286	0.23209	0.268108	FALSE	FALSE	FALSE	R0bGz1	1.55975e-12	0.0329407	outcome	TRUE	reported	textfile	0.0227584	4.30916e-12	TRIM26	TRUE	reported	Pah4U5	textfile	2	TRUE
rs9296059	C	A	C	A	0.174077	0.288198	0.0970149	0.0844254	FALSE	FALSE	FALSE	R0bGz1	5.65441e-08	0.053081	outcome	TRUE	reported	textfile	0.0340974	4.44073e-07	HLA-DMB	TRUE	reported	QXEKBz	textfile	2	TRUE
rs9368609	T	C	T	C	0.688787	0.273383	0.238806	0.259859	FALSE	FALSE	FALSE	R0bGz1	1.36596e-16	0.0330665	outcome	TRUE	reported	textfile	0.050248	2.1154e-37	IFITM4P	TRUE	reported	MnRJUk	textfile	2	TRUE
rs9469220	A	G	A	G	-0.0733494	0.28514	0.485821	0.495609	FALSE	FALSE	FALSE	R0bGz1	6.13333e-23	0.0289154	outcome	TRUE	reported	textfile	0.0180994	5.73195e-05	HLA-DRB1	TRUE	reported	uWd2Nx	textfile	2	TRUE
rs986475	G	A	G	A	-0.234914	0.431622	0.091791	0.0759794	FALSE	FALSE	FALSE	R0bGz1	1.21843e-14	0.0559524	outcome	TRUE	reported	textfile	0.0277178	1.81993e-16	NCR3	TRUE	reported	zjOuSk	textfile	2	TRUE

## Sheet: ST_10
Table S10. Protein-protein interaction network from the STRING database. The "geneB" column shows genes encoding proteins in the corresponding "level" column. The "geneA" column shows gene encoding proteins in the preceding level that interacts with the proteins encoded by "geneB".
geneA	geneB	score	db	level
SGF29	SUPT3H	0.999	string	1
SGF29	TAF12	0.999	string	1
SGF29	TAF10	0.999	string	1
SGF29	TADA3	0.999	string	1
SGF29	KAT2A	0.999	string	1
SGF29	TADA2B	0.999	string	1
SGF29	TAF9	0.999	string	1
SGF29	TADA2A	0.999	string	1
SGF29	TRRAP	0.999	string	1
SGF29	KAT14	0.999	string	1
SGF29	ZZZ3	0.999	string	1
SGF29	KAT2B	0.999	string	1
SGF29	ENY2	0.999	string	1
SGF29	SUPT20H	0.999	string	1
SGF29	USP22	0.998	string	1
SGF29	TADA1	0.997	string	1
SGF29	TAF5L	0.997	string	1
SGF29	TAF9B	0.997	string	1
SGF29	TAF6L	0.997	string	1
SGF29	ATXN7	0.996	string	1
SGF29	YEATS2	0.995	string	1
SGF29	TAF6	0.995	string	1
SGF29	SUPT7L	0.993	string	1
SGF29	ATXN7L3	0.992	string	1
SGF29	TAF5	0.99	string	1
SGF29	H3C12	0.989	string	1
SGF29	MBIP	0.985	string	1
SGF29	WDR5	0.982	string	1
SGF29	H3C13	0.981	string	1
SGF29	DR1	0.979	string	1
SGF29	H3-4	0.977	string	1
SGF29	H3-5	0.969	string	1
SGF29	H3-3B	0.969	string	1
SGF29	H3-2	0.969	string	1
SGF29	ATXN7-2	0.964	string	1
SGF29	SF3B5	0.963	string	1
SGF29	MOCS2	0.957	string	1
SGF29	TAF4	0.95	string	1
SGF29	SF3B3	0.947	string	1
SGF29	H3C6	0.923	string	1
SGF29	H3C3	0.923	string	1
SGF29	H3C4	0.92	string	1
SGF29	H3C1	0.92	string	1
SGF29	H3C2	0.92	string	1
SGF29	H3C10	0.92	string	1
SGF29	H3C7	0.92	string	1
SGF29	H3C14	0.92	string	1
SGF29	H3C8	0.92	string	1
SGF29	H3C11	0.92	string	1
SGF29	H3C15	0.92	string	1
SGF29	H3-3A	0.92	string	1
SGF29	TAF2	0.915	string	1
SGF29	TAF7	0.911	string	1
SGF29	POLE3	0.905	string	1
SLC25A20	CPT2	0.996	string	1
SLC25A20	CPT1A	0.926	string	1
SLC25A20	CPT1B	0.926	string	1
SLC25A20	CPT1C	0.925	string	1
SLC25A20	AASDH	0.917	string	1
SLC25A20	CRAT	0.916	string	1
SLC25A20	SLC25A29	0.908	string	1
NCR3	NCR3LG1	0.999	string	1
NCR3	CD247	0.999	string	1
NCR3	FCER1G	0.998	string	1
NCR3	NCR2	0.995	string	1
NCR3	BAG6	0.995	string	1
NCR3	NCR1	0.992	string	1
NCR3	KLRK1	0.972	string	1
NCR3	NECTIN2	0.959	string	1
NCR3	CD226	0.946	string	1
NCR3	MICB	0.945	string	1
NCR3	PVR	0.938	string	1
NCR3	PRF1	0.927	string	1
NCR3	FCGR3A	0.92	string	1
NCR3	FCGR3B	0.916	string	1
NCR3	SLAMF6	0.914	string	1
NCR3	NCAM1	0.91	string	1
NCR3	KLRC1	0.903	string	1
TAP1	TAP2	0.999	string	1
TAP1	TAPBP	0.995	string	1
TAP1	HLA-A	0.984	string	1
TAP1	B2M	0.984	string	1
TAP1	PSMB9	0.981	string	1
TAP1	PDIA3	0.974	string	1
TAP1	PSMB8	0.973	string	1
TAP1	CALR	0.962	string	1
TAP1	HLA-B	0.924	string	1
HLA-DRB1	HLA-DMA	0.999	string	1
HLA-DRB1	HLA-DRA	0.999	string	1
HLA-DRB1	HLA-DMB	0.997	string	1
HLA-DRB1	CD74	0.995	string	1
HLA-DRB1	CD4	0.994	string	1
HLA-DRB1	HLA-DQA1	0.991	string	1
HLA-DRB1	HLA-DPA1	0.979	string	1
HLA-DRB1	PTPN22	0.968	string	1
HLA-DRB1	HLA-C	0.967	string	1
HLA-DRB1	HLA-B	0.963	string	1
HLA-DRB1	HLA-DQA2	0.955	string	1
HLA-DRB1	HLA-DRB5	0.955	string	1
HLA-DRB1	HLA-DOA	0.947	string	1
HLA-DRB1	HLA-DOB	0.944	string	1
HLA-DRB1	HLA-DPB1	0.943	string	1
HLA-DRB1	HLA-A	0.942	string	1
HLA-DRB1	ENO1	0.942	string	1
HLA-DRB1	HLA-F	0.94	string	1
HLA-DRB1	HLA-E	0.939	string	1
HLA-DRB1	CAMP	0.934	string	1
HLA-DRB1	VIM	0.932	string	1
HLA-DRB1	EEF1A1	0.914	string	1
HLA-DRB1	EEF1A2	0.908	string	1
HLA-DRB1	MLANA	0.906	string	1
HLA-DRB1	TPI1	0.904	string	1
HLA-DRB1	TPBG	0.902	string	1
HLA-DRB1	H2BC13	0.901	string	1
HLA-DRB1	H2BU1	0.901	string	1
HLA-DRB1	H2BC1	0.901	string	1
HSP90AB1	HSPA4	0.999	string	1
HSP90AB1	CDC37	0.999	string	1
HSP90AB1	AHSA1	0.999	string	1
HSP90AB1	STUB1	0.999	string	1
HSP90AB1	CDK4	0.999	string	1
HSP90AB1	AIP	0.999	string	1
HSP90AB1	AR	0.999	string	1
HSP90AB1	TOMM70	0.999	string	1
HSP90AB1	FKBP4	0.999	string	1
HSP90AB1	STIP1	0.999	string	1
HSP90AB1	FKBP5	0.999	string	1
HSP90AB1	HSPA8	0.999	string	1
HSP90AB1	AKT1	0.999	string	1
HSP90AB1	DNAJB1	0.999	string	1
HSP90AB1	PTGES3	0.999	string	1
HSP90AB1	PPID	0.999	string	1
HSP90AB1	NR3C1	0.998	string	1
HSP90AB1	HIF1A	0.998	string	1
HSP90AB1	HDAC6	0.998	string	1
HSP90AB1	NOS3	0.998	string	1
HSP90AB1	SUGT1	0.998	string	1
HSP90AB1	BRAF	0.998	string	1
HSP90AB1	MTOR	0.998	string	1
HSP90AB1	EGFR	0.998	string	1
HSP90AB1	HSP90AA1	0.997	string	1
HSP90AB1	PPP5C	0.997	string	1
HSP90AB1	TP53	0.995	string	1
HSP90AB1	SRC	0.995	string	1
HSP90AB1	CALML4	0.995	string	1
HSP90AB1	AHR	0.995	string	1
HSP90AB1	CALM3	0.995	string	1
HSP90AB1	CALML5	0.995	string	1
HSP90AB1	CALML6	0.995	string	1
HSP90AB1	CALML3	0.995	string	1
HSP90AB1	ST13	0.995	string	1
HSP90AB1	ESR1	0.993	string	1
HSP90AB1	RAF1	0.993	string	1
HSP90AB1	ERBB2	0.993	string	1
HSP90AB1	AGO2	0.992	string	1
HSP90AB1	RPAP3	0.992	string	1
HSP90AB1	HSF1	0.992	string	1
HSP90AB1	HSPA1B	0.991	string	1
HSP90AB1	LRP1	0.99	string	1
HSP90AB1	FKBP8	0.989	string	1
HSP90AB1	TLR4	0.988	string	1
HSP90AB1	APAF1	0.988	string	1
HSP90AB1	TERT	0.987	string	1
HSP90AB1	NLRP3	0.986	string	1
HSP90AB1	CAV1	0.983	string	1
HSP90AB1	PPIF	0.982	string	1
HSP90AB1	TLR2	0.982	string	1
HSP90AB1	RSF1	0.981	string	1
HSP90AB1	CHUK	0.979	string	1
HSP90AB1	PGR	0.978	string	1
HSP90AB1	HSPA5	0.977	string	1
HSP90AB1	IKBKB	0.976	string	1
HSP90AB1	CALR	0.975	string	1
HSP90AB1	FKBPL	0.974	string	1
HSP90AB1	RIPK1	0.972	string	1
HSP90AB1	PIH1D1	0.972	string	1
HSP90AB1	HSPD1	0.97	string	1
HSP90AB1	CCT2	0.97	string	1
HSP90AB1	RUVBL1	0.97	string	1
HSP90AB1	HSPA1A	0.969	string	1
HSP90AB1	DNAJA1	0.967	string	1
HSP90AB1	RIPK3	0.964	string	1
HSP90AB1	CFTR	0.964	string	1
HSP90AB1	HDAC4	0.962	string	1
HSP90AB1	BAG3	0.96	string	1
HSP90AB1	CCT5	0.959	string	1
HSP90AB1	AKT3	0.956	string	1
HSP90AB1	TCP1	0.956	string	1
HSP90AB1	CCT7	0.956	string	1
HSP90AB1	HSPA9	0.955	string	1
HSP90AB1	CDC37L1	0.954	string	1
HSP90AB1	HSP90B1	0.953	string	1
HSP90AB1	HSPB1	0.952	string	1
HSP90AB1	HSPB8	0.948	string	1
HSP90AB1	CCT8	0.947	string	1
HSP90AB1	AKT2	0.946	string	1
HSP90AB1	CCT4	0.946	string	1
HSP90AB1	UNC45B	0.945	string	1
HSP90AB1	MLKL	0.943	string	1
HSP90AB1	CHORDC1	0.942	string	1
HSP90AB1	LRRK2	0.942	string	1
HSP90AB1	CCT3	0.94	string	1
HSP90AB1	MAPT	0.938	string	1
HSP90AB1	RUVBL2	0.937	string	1
HSP90AB1	KEAP1	0.933	string	1
HSP90AB1	HSPB2	0.931	string	1
HSP90AB1	ABL1	0.93	string	1
HSP90AB1	HSPE1	0.928	string	1
HSP90AB1	MOS	0.928	string	1
HSP90AB1	RIPK2	0.928	string	1
HSP90AB1	IKBKG	0.928	string	1
HSP90AB1	EZR	0.927	string	1
HSP90AB1	CCT6A	0.924	string	1
HSP90AB1	HSPA1L	0.924	string	1
HSP90AB1	HSPB3	0.921	string	1
HSP90AB1	GSK3B	0.92	string	1
HSP90AB1	TGFBR2	0.92	string	1
HSP90AB1	HSPH1	0.916	string	1
HSP90AB1	AGO1	0.913	string	1
HSP90AB1	BCL2A1	0.912	string	1
HSP90AB1	ACTB	0.911	string	1
HSP90AB1	TSG101	0.911	string	1
HSP90AB1	VCP	0.906	string	1
HSP90AB1	NCOR1	0.906	string	1
HSP90AB1	HSPBP1	0.902	string	1
BAK1	BCL2L1	0.999	string	1
BAK1	BCL2	0.999	string	1
BAK1	BID	0.999	string	1
BAK1	MCL1	0.998	string	1
BAK1	BCL2L11	0.998	string	1
BAK1	TP53	0.997	string	1
BAK1	BAX	0.996	string	1
BAK1	BCL2A1	0.983	string	1
BAK1	CYCS	0.975	string	1
BAK1	BCL2L2	0.959	string	1
BAK1	CAPN1	0.948	string	1
BAK1	BBC3	0.923	string	1
BAK1	TMBIM6	0.918	string	1
BAK1	CAPN2	0.915	string	1
HSD17B8	CBR4	0.999	string	1
HSD17B8	OXSM	0.981	string	1
HSD17B8	HSD17B12	0.973	string	1
HSD17B8	HSD17B3	0.964	string	1
HSD17B8	HSD17B1	0.959	string	1
HSD17B8	HSD17B7	0.957	string	1
HSD17B8	FASN	0.949	string	1
HSD17B8	HTD2	0.938	string	1
HSD17B8	AKR1C3	0.936	string	1
HSD17B8	SLC39A7	0.936	string	1
HSD17B8	DHRS11	0.936	string	1
HSD17B8	CYP17A1	0.935	string	1
HSD17B8	HSD17B2	0.935	string	1
HSD17B8	CYP1B1	0.933	string	1
HSD17B8	CYP19A1	0.932	string	1
HSD17B8	HSD3B1	0.929	string	1
HSD17B8	SRD5A3	0.927	string	1
HSD17B8	CYP1A1	0.926	string	1
HSD17B8	AKR1D1	0.924	string	1
HSD17B8	HSD3B2	0.923	string	1
HSD17B8	CYP3A5	0.923	string	1
HSD17B8	SRD5A1	0.922	string	1
HSD17B8	CYP3A4	0.921	string	1
HSD17B8	SULT1E1	0.921	string	1
HSD17B8	CYP11B1	0.92	string	1
HSD17B8	SRD5A2	0.919	string	1
HSD17B8	CYP11B2	0.919	string	1
HSD17B8	HSD17B6	0.918	string	1
PSMB8	POMP	0.999	string	1
PSMB8	PSMA3	0.999	string	1
PSMB8	PSMB3	0.999	string	1
PSMB8	PSMB2	0.999	string	1
PSMB8	PSMB9	0.999	string	1
PSMB8	PSMA4	0.999	string	1
PSMB8	PSMA5	0.999	string	1
PSMB8	PSMA6	0.999	string	1
PSMB8	PSMB1	0.999	string	1
PSMB8	PSMB6	0.999	string	1
PSMB8	PSMA1	0.999	string	1
PSMB8	PSMB7	0.999	string	1
PSMB8	PSMB4	0.999	string	1
PSMB8	PSMA2	0.999	string	1
PSMB8	PSMA7	0.999	string	1
PSMB8	PSMB10	0.999	string	1
PSMB8	PSMA8	0.994	string	1
PSMB8	PSME2	0.987	string	1
PSMB8	PSMC4	0.987	string	1
PSMB8	PSME4	0.986	string	1
PSMB8	PSME1	0.985	string	1
PSMB8	PSMC5	0.981	string	1
PSMB8	PSMC1	0.975	string	1
PSMB8	PSMD4	0.973	string	1
PSMB8	PSMC2	0.972	string	1
PSMB8	PSMD14	0.97	string	1
PSMB8	PSMD12	0.968	string	1
PSMB8	PSMC3	0.966	string	1
PSMB8	PSMB5	0.962	string	1
PSMB8	PSMD8	0.957	string	1
PSMB8	PSMD6	0.955	string	1
PSMB8	PSMC6	0.954	string	1
PSMB8	PSMD1	0.948	string	1
PSMB8	PSMD13	0.938	string	1
PSMB8	PSMD2	0.934	string	1
PSMB8	PSMD7	0.932	string	1
PSMB8	ADRM1	0.932	string	1
PSMB8	CTRL	0.918	string	1
PSMB8	TAP2	0.917	string	1
PSMB8	TAPBP	0.913	string	1
PSMB8	PSMD3	0.909	string	1
PSMB8	STAT1	0.906	string	1
PSMB8	PSMD11	0.903	string	1
PBX2	PKNOX1	0.972	string	1
PBX2	MEIS2	0.964	string	1
AGER	S100B	0.999	string	1
AGER	HMGB1	0.999	string	1
AGER	S100A12	0.999	string	1
AGER	S100A4	0.988	string	1
AGER	S100A6	0.983	string	1
AGER	DIAPH1	0.972	string	1
AGER	S100P	0.962	string	1
AGER	S100A11	0.961	string	1
AGER	S100A13	0.954	string	1
AGER	KRAS	0.944	string	1
AGER	TLR4	0.94	string	1
AGER	CYBB	0.939	string	1
AGER	NOX4	0.93	string	1
AGER	NOX1	0.925	string	1
AGER	JAK2	0.92	string	1
AGER	HRAS	0.915	string	1
AGER	NRAS	0.904	string	1
FKBPL	HSP90AA1	0.99	string	1
DXO	XRN2	0.999	string	1
DXO	EXOSC7	0.994	string	1
DXO	TJAP1	0.905	string	1
SKIV2L	WDR61	0.999	string	1
SKIV2L	TTC37	0.999	string	1
SKIV2L	EXOSC4	0.963	string	1
SKIV2L	EXOSC1	0.96	string	1
SKIV2L	EXOSC5	0.946	string	1
SKIV2L	EXOSC7	0.946	string	1
SKIV2L	EXOSC3	0.946	string	1
SKIV2L	EXOSC6	0.943	string	1
SKIV2L	XRN1	0.939	string	1
SKIV2L	EXOSC8	0.936	string	1
SKIV2L	FAU	0.931	string	1
SKIV2L	STK19	0.916	string	1
SKIV2L	EXOSC10	0.91	string	1
SKIV2L	EXOSC9	0.901	string	1
HSPA1B	DNAJB1	0.998	string	1
HSPA1B	TLR2	0.998	string	1
HSPA1B	HSP90AA1	0.998	string	1
HSPA1B	HSPBP1	0.995	string	1
HSPA1B	HSPA1A	0.994	string	1
HSPA1B	BAG5	0.991	string	1
HSPA1B	YBX1	0.991	string	1
HSPA1B	DNAJA1	0.984	string	1
HSPA1B	BAG3	0.983	string	1
HSPA1B	STIP1	0.981	string	1
HSPA1B	STUB1	0.979	string	1
HSPA1B	DNAJB4	0.976	string	1
HSPA1B	DNAJB6	0.976	string	1
HSPA1B	TP53	0.971	string	1
HSPA1B	BAG1	0.971	string	1
HSPA1B	DNAJA4	0.964	string	1
HSPA1B	HSPA6	0.959	string	1
HSPA1B	DNAJA2	0.958	string	1
HSPA1B	HSPH1	0.953	string	1
HSPA1B	HSPA8	0.947	string	1
HSPA1B	HSF1	0.944	string	1
HSPA1B	TLR4	0.941	string	1
HSPA1B	HSPB1	0.939	string	1
HSPA1B	DNAJC7	0.939	string	1
HSPA1B	HSPA4	0.939	string	1
HSPA1B	NR3C1	0.935	string	1
HSPA1B	MAPK8	0.925	string	1
HSPA1B	EGFR	0.923	string	1
HSPA1B	FAF1	0.922	string	1
HSPA1B	MAPK9	0.917	string	1
HSPA1B	BAG2	0.914	string	1
HSPA1B	DNAJA3	0.913	string	1
HSPA1B	DNAJB2	0.907	string	1
HSPA1B	HSPB2	0.9	string	1
VWA7	VARS1	0.969	string	1
MSH5	MSH4	0.999	string	1
MSH5	MLH3	0.986	string	1
MSH5	MLH1	0.971	string	1
MSH5	HFM1	0.956	string	1
MSH5	PMS2	0.949	string	1
MSH5	HJURP	0.932	string	1
MSH5	PMS1	0.915	string	1
MSH5	RAD51	0.915	string	1
CSNK2B	CSNK2A2	0.999	string	1
CSNK2B	CSNK2A1	0.999	string	1
CSNK2B	CSNK2A3	0.967	string	1
CSNK2B	NFKBIA	0.964	string	1
CSNK2B	RYBP	0.964	string	1
CSNK2B	PCGF5	0.961	string	1
CSNK2B	CTNNB1	0.955	string	1
CSNK2B	RRP7A	0.944	string	1
CSNK2B	SSRP1	0.943	string	1
CSNK2B	DVL2	0.94	string	1
CSNK2B	NOL6	0.935	string	1
CSNK2B	SUPT16H	0.926	string	1
CSNK2B	DVL1	0.917	string	1
CSNK2B	DVL3	0.917	string	1
CSNK2B	PTEN	0.91	string	1
CSNK2B	PRNP	0.909	string	1
CSNK2B	FUNDC1	0.906	string	1
CSNK2B	RNF2	0.902	string	1
GPANK1	APOM	0.967	string	1
PPP1R10	PPP1CA	0.989	string	1
PPP1R10	WDR82	0.98	string	1
PPP1R10	PPP1CC	0.975	string	1
PPP1R10	PPP1CB	0.964	string	1
PPP1R10	TOX4	0.962	string	1
PPP1R11	PPP1R7	0.98	string	1
PPP1R11	PPP1CB	0.955	string	1
PPP1R11	PPP1CC	0.954	string	1
PPP1R11	PPP1CA	0.942	string	1
MOG	MBP	0.955	string	1
MOG	MAG	0.935	string	1
MOG	PLP1	0.903	string	1
IL6ST	IL6R	0.999	string	1
IL6ST	IL6	0.999	string	1
IL6ST	LIF	0.999	string	1
IL6ST	IL27RA	0.999	string	1
IL6ST	JAK1	0.998	string	1
IL6ST	OSM	0.998	string	1
IL6ST	IL11	0.997	string	1
IL6ST	LIFR	0.997	string	1
IL6ST	CNTF	0.996	string	1
IL6ST	IL27	0.996	string	1
IL6ST	JAK2	0.993	string	1
IL6ST	STAT3	0.992	string	1
IL6ST	SOCS3	0.992	string	1
IL6ST	CNTFR	0.986	string	1
IL6ST	PTPN11	0.981	string	1
IL6ST	CTF1	0.98	string	1
IL6ST	OSMR	0.975	string	1
IL6ST	EBI3	0.963	string	1
IL6ST	CLCF1	0.959	string	1
IL6ST	GRB2	0.956	string	1
IL6ST	TYK2	0.952	string	1
IL6ST	PIK3CA	0.948	string	1
IL6ST	PIK3R1	0.944	string	1
IL6ST	STAT1	0.927	string	1
IL6ST	JAK3	0.923	string	1
IL6ST	IL11RA	0.918	string	1
IL6ST	PIK3CB	0.906	string	1
IL6ST	PIK3R2	0.905	string	1
IL6ST	PIK3R3	0.901	string	1
IL6ST	PIK3CD	0.901	string	1
AGPAT1	AGPAT3	0.979	string	1
AGPAT1	AGPAT4	0.974	string	1
AGPAT1	MBOAT2	0.974	string	1
AGPAT1	CDS2	0.973	string	1
AGPAT1	CDS1	0.969	string	1
AGPAT1	AGPAT5	0.965	string	1
AGPAT1	PLPP2	0.962	string	1
AGPAT1	PLPP3	0.954	string	1
AGPAT1	LCLAT1	0.948	string	1
AGPAT1	PLPP5	0.938	string	1
AGPAT1	MBOAT1	0.938	string	1
AGPAT1	GPAM	0.932	string	1
AGPAT1	PLPP4	0.932	string	1
AGPAT1	GPAT4	0.918	string	1
AGPAT1	AGPAT2	0.911	string	1
AGPAT1	AGK	0.905	string	1
AGPAT1	GNPAT	0.903	string	1
EHMT2	EHMT1	0.999	string	1
EHMT2	CBX3	0.999	string	1
EHMT2	HDAC1	0.999	string	1
EHMT2	H3-3B	0.998	string	1
EHMT2	DNMT1	0.998	string	1
EHMT2	H3C13	0.998	string	1
EHMT2	H3C12	0.998	string	1
EHMT2	UHRF1	0.997	string	1
EHMT2	H3-4	0.996	string	1
EHMT2	H3-5	0.995	string	1
EHMT2	KDM1A	0.995	string	1
EHMT2	H3-2	0.995	string	1
EHMT2	CDYL	0.995	string	1
EHMT2	DNMT3A	0.993	string	1
EHMT2	KDM5C	0.99	string	1
EHMT2	SNAI1	0.99	string	1
EHMT2	WIZ	0.989	string	1
EHMT2	RCOR1	0.986	string	1
EHMT2	HDAC2	0.982	string	1
EHMT2	SUV39H1	0.978	string	1
EHMT2	H3C1	0.971	string	1
EHMT2	H3C14	0.971	string	1
EHMT2	SETDB1	0.965	string	1
EHMT2	H3C6	0.954	string	1
EHMT2	EZH2	0.953	string	1
EHMT2	H3C3	0.953	string	1
EHMT2	ZNF644	0.951	string	1
EHMT2	CBX5	0.949	string	1
EHMT2	DNMT3B	0.933	string	1
EHMT2	H3C11	0.933	string	1
EHMT2	H3C10	0.931	string	1
EHMT2	H3C2	0.931	string	1
EHMT2	BANF1	0.929	string	1
EHMT2	REST	0.926	string	1
EHMT2	MED12	0.925	string	1
EHMT2	H3-3A	0.925	string	1
EHMT2	H3C4	0.923	string	1
EHMT2	H3C7	0.923	string	1
EHMT2	H3C15	0.923	string	1
EHMT2	PRDM1	0.923	string	1
EHMT2	H3C8	0.923	string	1
EHMT2	TP53	0.919	string	1
EHMT2	GFI1	0.909	string	1
EHMT2	CBX1	0.907	string	1
HLA-A	KIR3DL1	0.999	string	1
HLA-A	HLA-B	0.999	string	1
HLA-A	B2M	0.999	string	1
HLA-A	CD8A	0.999	string	1
HLA-A	KIR3DL2	0.999	string	1
HLA-A	LILRB1	0.999	string	1
HLA-A	HLA-C	0.998	string	1
HLA-A	TAPBP	0.998	string	1
HLA-A	CALR	0.997	string	1
HLA-A	KIR2DL3	0.996	string	1
HLA-A	HLA-F	0.996	string	1
HLA-A	PDIA3	0.993	string	1
HLA-A	LILRB2	0.992	string	1
HLA-A	HLA-E	0.989	string	1
HLA-A	KIR2DL1	0.984	string	1
HLA-A	KLRC1	0.978	string	1
HLA-A	HLA-DQA1	0.973	string	1
HLA-A	KIR3DL3	0.972	string	1
HLA-A	AP1M1	0.966	string	1
HLA-A	HLA-DMA	0.966	string	1
HLA-A	CD247	0.963	string	1
HLA-A	TAP2	0.963	string	1
HLA-A	HLA-DOA	0.96	string	1
HLA-A	LOC102723407	0.958	string	1
HLA-A	HLA-DPA1	0.957	string	1
HLA-A	KLRD1	0.952	string	1
HLA-A	HLA-DRA	0.95	string	1
HLA-A	HLA-G	0.947	string	1
HLA-A	HLA-DPB1	0.942	string	1
HLA-A	CD3E	0.941	string	1
HLA-A	TRDV1	0.932	string	1
HLA-A	HLA-DMB	0.931	string	1
HLA-A	IGLL5	0.93	string	1
HLA-A	AP1G1	0.928	string	1
HLA-A	AP1B1	0.927	string	1
HLA-A	AP1S3	0.927	string	1
HLA-A	IGHV3-43D	0.927	string	1
HLA-A	CD3D	0.925	string	1
HLA-A	GYPC	0.924	string	1
HLA-A	CD8B2	0.922	string	1
HLA-A	HLA-DOB	0.922	string	1
HLA-A	CD3G	0.919	string	1
HLA-A	HLA-DQA2	0.919	string	1
HLA-A	IL27RA	0.917	string	1
HLA-A	LSP1	0.914	string	1
HLA-A	RAB9A	0.904	string	1
HLA-A	IGHV3-16	0.901	string	1
HLA-DQB2	CD74	0.966	string	1
HLA-DQB2	HLA-DRA	0.962	string	1
HLA-DQB2	HLA-DQA2	0.942	string	1
HLA-DQB2	HLA-DMA	0.927	string	1
HLA-DMB	HLA-DMA	0.999	string	1
HLA-DMB	HLA-DRA	0.999	string	1
HLA-DMB	HLA-DOB	0.998	string	1
HLA-DMB	HLA-DPA1	0.997	string	1
HLA-DMB	HLA-DPB1	0.988	string	1
HLA-DMB	HLA-DOA	0.987	string	1
HLA-DMB	CD74	0.982	string	1
HLA-DMB	HLA-B	0.965	string	1
HLA-DMB	HLA-C	0.95	string	1
HLA-DMB	CD4	0.941	string	1
HLA-DMB	HLA-F	0.937	string	1
HLA-DMB	HLA-E	0.931	string	1
HLA-DMB	HLA-DQB1	0.928	string	1
HLA-DMB	CD247	0.919	string	1
HLA-DMB	LOC102723407	0.913	string	1
HLA-DMB	HLA-DQA1	0.902	string	1
ERAP2	TPP2	0.905	string	1
LTA	LTBR	0.999	string	1
LTA	TNFRSF14	0.999	string	1
LTA	LTB	0.999	string	1
LTA	TNFRSF1B	0.999	string	1
LTA	TNFRSF1A	0.999	string	1
LTA	TNF	0.984	string	1
LTB	LTBR	0.999	string	1
CLN3	CLN5	0.997	string	1
CLN3	PPT1	0.985	string	1
CLN3	CLN6	0.979	string	1
CLN3	CLN8	0.966	string	1
CLN3	MFSD8	0.952	string	1
CLN3	HOOK1	0.936	string	1
CLN3	DNAJC5	0.914	string	1
CLN3	TPP1	0.911	string	1
APOBR	APOB	0.969	string	1
FKBP4	HSP90AB1	0.999	string	2
FKBP4	HSP90AA1	0.999	string	2
FKBP4	HSPA4	0.998	string	2
FKBP4	NR3C1	0.996	string	2
FKBP4	PHLPP1	0.993	string	2
FKBP4	PTGES3	0.99	string	2
FKBP4	GLMN	0.983	string	2
FKBP4	STIP1	0.979	string	2
FKBP4	PGR	0.977	string	2
FKBP4	AHSA1	0.973	string	2
FKBP4	FKBP5	0.972	string	2
FKBP4	MTOR	0.961	string	2
FKBP4	DNAJB1	0.957	string	2
FKBP4	NR3C2	0.945	string	2
FKBP4	HSPA8	0.942	string	2
FKBP4	PPID	0.937	string	2
FKBP4	AR	0.928	string	2
FKBP4	AKT1	0.914	string	2
CFTR	SLC9A3R1	0.999	string	2
CFTR	GOPC	0.992	string	2
CFTR	HSPA8	0.986	string	2
CFTR	HSP90AA1	0.986	string	2
CFTR	PRKACA	0.982	string	2
CFTR	RNF5	0.979	string	2
CFTR	PRKACG	0.976	string	2
CFTR	PRKACB	0.976	string	2
CFTR	SLC9A3R2	0.975	string	2
CFTR	STUB1	0.97	string	2
CFTR	PDZK1	0.969	string	2
CFTR	TJP1	0.964	string	2
CFTR	HSP90AB1	0.964	string	2
CFTR	FLNA	0.957	string	2
CFTR	PRKAA1	0.953	string	2
CFTR	YWHAB	0.944	string	2
CFTR	PRKAB2	0.944	string	2
CFTR	VCP	0.938	string	2
CFTR	CANX	0.936	string	2
CFTR	USP10	0.935	string	2
CFTR	KCNJ1	0.925	string	2
CFTR	HSPA4	0.925	string	2
CFTR	PRKAG1	0.922	string	2
CFTR	SLC26A6	0.921	string	2
CFTR	DERL1	0.917	string	2
CFTR	YWHAZ	0.917	string	2
CFTR	YWHAG	0.914	string	2
CFTR	SLC26A9	0.91	string	2
CFTR	PRKAB1	0.908	string	2
CFTR	PRKAA2	0.907	string	2
CFTR	PRKAG2	0.905	string	2
CFTR	PRKAG3	0.901	string	2
DVL2	AXIN1	0.999	string	2
DVL2	VANGL1	0.994	string	2
DVL2	VANGL2	0.994	string	2
DVL2	LRP6	0.993	string	2
DVL2	DACT1	0.992	string	2
DVL2	DVL1	0.991	string	2
DVL2	DVL3	0.99	string	2
DVL2	FZD4	0.985	string	2
DVL2	ARRB2	0.981	string	2
DVL2	PRICKLE1	0.979	string	2
DVL2	WNT5A	0.978	string	2
DVL2	DAAM1	0.978	string	2
DVL2	GSK3B	0.976	string	2
DVL2	PRICKLE2	0.971	string	2
DVL2	PRICKLE3	0.97	string	2
DVL2	AXIN2	0.969	string	2
DVL2	PRICKLE4	0.969	string	2
DVL2	CSNK1E	0.967	string	2
DVL2	FZD5	0.964	string	2
DVL2	FZD7	0.964	string	2
DVL2	APC	0.964	string	2
DVL2	NKD1	0.962	string	2
DVL2	PARD6A	0.958	string	2
DVL2	NKD2	0.957	string	2
DVL2	FZD2	0.956	string	2
DVL2	CSNK2A1	0.943	string	2
DVL2	WWTR1	0.942	string	2
DVL2	INVS	0.942	string	2
DVL2	CSNK2B	0.94	string	2
DVL2	FZD8	0.937	string	2
DVL2	DAAM2	0.936	string	2
DVL2	BAMBI	0.934	string	2
DVL2	FZD6	0.933	string	2
DVL2	NOTCH1	0.931	string	2
DVL2	NOTCH3	0.93	string	2
DVL2	CTNNB1	0.93	string	2
DVL2	ARRB1	0.929	string	2
DVL2	FZD1	0.928	string	2
DVL2	FZD9	0.927	string	2
DVL2	NOTCH2	0.926	string	2
DVL2	FRAT1	0.921	string	2
DVL2	CSNK2A2	0.918	string	2
DVL2	WNT3A	0.916	string	2
DVL2	CXXC4	0.915	string	2
DVL2	PLK1	0.914	string	2
DVL2	NOTCH4	0.914	string	2
DVL2	GNAQ	0.911	string	2
DVL2	APC2	0.908	string	2
DVL2	CSNK2A3	0.906	string	2
DVL2	SENP2	0.906	string	2
DVL2	FRAT2	0.904	string	2
RPAP3	RUVBL1	0.999	string	2
RPAP3	PIH1D1	0.999	string	2
RPAP3	RUVBL2	0.999	string	2
RPAP3	PFDN6	0.996	string	2
RPAP3	WDR92	0.995	string	2
RPAP3	HSP90AB1	0.992	string	2
RPAP3	HSP90AA1	0.99	string	2
RPAP3	UXT	0.989	string	2
RPAP3	POLR2E	0.988	string	2
RPAP3	PDRG1	0.987	string	2
RPAP3	PFDN2	0.986	string	2
RPAP3	URI1	0.977	string	2
RPAP3	RPAP2	0.963	string	2
RPAP3	POLR2J	0.936	string	2
RPAP3	GPN1	0.935	string	2
RPAP3	RPAP1	0.931	string	2
RPAP3	TARBP2	0.904	string	2
RPAP3	PIH1D2	0.902	string	2
CD74	CD44	0.999	string	2
CD74	MIF	0.999	string	2
CD74	HLA-DRA	0.999	string	2
CD74	HLA-DQB1	0.997	string	2
CD74	FAU	0.997	string	2
CD74	HLA-DRB1	0.995	string	2
CD74	CXCR4	0.994	string	2
CD74	HLA-DMA	0.994	string	2
CD74	HLA-DQA1	0.994	string	2
CD74	CXCR2	0.994	string	2
CD74	CTSL	0.993	string	2
CD74	HLA-DPA1	0.993	string	2
CD74	HLA-DQA2	0.992	string	2
CD74	HLA-DRB5	0.986	string	2
CD74	RPS19	0.985	string	2
CD74	APP	0.985	string	2
CD74	RPLP0	0.983	string	2
CD74	RPS3	0.983	string	2
CD74	HLA-DPB1	0.982	string	2
CD74	RPL4	0.982	string	2
CD74	RPL5	0.982	string	2
CD74	RPS18	0.982	string	2
CD74	RPS9	0.982	string	2
CD74	HLA-DMB	0.982	string	2
CD74	RPS5	0.981	string	2
CD74	RPS20	0.981	string	2
CD74	CTSS	0.981	string	2
CD74	RPL23A	0.981	string	2
CD74	RPS15	0.981	string	2
CD74	RPS2	0.981	string	2
CD74	RPS24	0.981	string	2
CD74	RPL11	0.981	string	2
CD74	RPL36	0.981	string	2
CD74	RPL23	0.981	string	2
CD74	RPSA	0.981	string	2
CD74	RPS16	0.981	string	2
CD74	RPL38	0.981	string	2
CD74	RPS11	0.981	string	2
CD74	RPL14	0.981	string	2
CD74	RPL30	0.98	string	2
CD74	RPS7	0.98	string	2
CD74	RPS28	0.98	string	2
CD74	RPL8	0.98	string	2
CD74	RPL9	0.98	string	2
CD74	RPL6	0.98	string	2
CD74	RPL35	0.98	string	2
CD74	RPS3A	0.98	string	2
CD74	RPS13	0.98	string	2
CD74	RPS26	0.98	string	2
CD74	RPS29	0.98	string	2
CD74	RPS8	0.979	string	2
CD74	RPS21	0.979	string	2
CD74	RPS12	0.979	string	2
CD74	RPL34	0.979	string	2
CD74	RPS23	0.979	string	2
CD74	RPL29	0.979	string	2
CD74	RPL27	0.979	string	2
CD74	RPL32	0.979	string	2
CD74	RPL21	0.979	string	2
CD74	RPS17	0.978	string	2
CD74	RPS25	0.978	string	2
CD74	RPS6	0.978	string	2
CD74	RPL27A	0.978	string	2
CD74	RPL19	0.978	string	2
CD74	RPL31	0.978	string	2
CD74	RPL18	0.977	string	2
CD74	RPL15	0.977	string	2
CD74	RPL12	0.977	string	2
CD74	RPL28	0.977	string	2
CD74	RPL13	0.976	string	2
CD74	RACK1	0.976	string	2
CD74	RPL24	0.975	string	2
CD74	HLA-DOB	0.975	string	2
CD74	RPL37	0.975	string	2
CD74	RPL35A	0.975	string	2
CD74	RPL7A	0.974	string	2
CD74	RPS27A	0.974	string	2
CD74	UBA52	0.973	string	2
CD74	RPL18A	0.973	string	2
CD74	RPL37A	0.972	string	2
CD74	TUFM	0.972	string	2
CD74	MRPL36	0.971	string	2
CD74	MRPL12	0.971	string	2
CD74	MRPL17	0.971	string	2
CD74	MRPS16	0.97	string	2
CD74	MRPL21	0.969	string	2
CD74	MRPS6	0.969	string	2
CD74	MRPL19	0.969	string	2
CD74	MRPL32	0.968	string	2
CD74	MRPL9	0.968	string	2
CD74	MRPL33	0.967	string	2
CD74	PDCD11	0.967	string	2
CD74	HLA-DOA	0.966	string	2
CD74	HLA-DQB2	0.966	string	2
CD74	DDT	0.965	string	2
CD74	MRPL20	0.959	string	2
CD74	MRPS9	0.957	string	2
CD74	CTSB	0.954	string	2
CD74	MRPL27	0.951	string	2
CD74	FLT3LG	0.947	string	2
CD74	EEF2	0.945	string	2
CD74	RPL13A	0.943	string	2
CD74	EIF1AY	0.942	string	2
CD74	RPLP1	0.94	string	2
CD74	IFI35	0.94	string	2
CD74	IMP3	0.938	string	2
CD74	RPL26L1	0.937	string	2
CD74	MED1	0.937	string	2
CD74	RPL26	0.937	string	2
CD74	RPS27	0.937	string	2
CD74	RPL3	0.937	string	2
CD74	RPL7	0.936	string	2
CD74	RPL10A	0.935	string	2
CD74	RPL17	0.935	string	2
CD74	RPS10-NUDT3	0.935	string	2
CD74	RPS10	0.935	string	2
CD74	RPLP2	0.935	string	2
CD74	RPL17-C18orf32	0.935	string	2
CD74	RPS27L	0.934	string	2
CD74	CXorf66	0.934	string	2
CD74	RPL3L	0.934	string	2
CD74	EIF1AX	0.934	string	2
CD74	LGMN	0.932	string	2
CD74	RPL7L1	0.932	string	2
CD74	RPL39	0.931	string	2
CD74	RPL39L	0.931	string	2
CD74	FANCE	0.931	string	2
CD74	RPL10	0.93	string	2
CD74	RPL10L	0.93	string	2
CD74	RSRC1	0.927	string	2
CD74	RSAD1	0.923	string	2
CD74	MRNIP	0.909	string	2
CD74	DOCK4	0.909	string	2
CD74	EIF5B	0.908	string	2
CD74	AKNAD1	0.905	string	2
CD74	RPL22	0.905	string	2
CD74	RPL22L1	0.904	string	2
CD4	LCK	0.999	string	2
CD4	CCR5	0.999	string	2
CD4	CD8A	0.999	string	2
CD4	ITIH4	0.999	string	2
CD4	CXCR4	0.999	string	2
CD4	IL16	0.998	string	2
CD4	HLA-DRA	0.997	string	2
CD4	CD5	0.997	string	2
CD4	CD2	0.996	string	2
CD4	ERVW-1	0.996	string	2
CD4	ZAP70	0.995	string	2
CD4	ENPEP	0.994	string	2
CD4	HLA-DRB1	0.994	string	2
CD4	IFNG	0.991	string	2
CD4	CD3E	0.991	string	2
CD4	CD247	0.989	string	2
CD4	CD3G	0.985	string	2
CD4	CD40LG	0.983	string	2
CD4	CD3D	0.982	string	2
CD4	CD81	0.982	string	2
CD4	HLA-DQA1	0.982	string	2
CD4	PTPRC	0.981	string	2
CD4	SYK	0.981	string	2
CD4	FYN	0.98	string	2
CD4	CD8B	0.98	string	2
CD4	FOXP3	0.979	string	2
CD4	HLA-DPA1	0.977	string	2
CD4	IL10	0.976	string	2
CD4	IL2	0.975	string	2
CD4	IL17A	0.972	string	2
CD4	CD28	0.971	string	2
CD4	IL4	0.97	string	2
CD4	ICAM1	0.969	string	2
CD4	CD82	0.968	string	2
CD4	TNF	0.968	string	2
CD4	IL6	0.966	string	2
CD4	FCGR3A	0.964	string	2
CD4	HLA-DQA2	0.961	string	2
CD4	IL7R	0.96	string	2
CD4	PDCD1	0.96	string	2
CD4	HLA-DPB1	0.96	string	2
CD4	HLA-DMA	0.96	string	2
CD4	FCGR3B	0.959	string	2
CD4	CD80	0.958	string	2
CD4	IL1B	0.958	string	2
CD4	CD86	0.958	string	2
CD4	CTLA4	0.955	string	2
CD4	HLA-DQB1	0.951	string	2
CD4	SKP1	0.95	string	2
CD4	CD44	0.95	string	2
CD4	ITGAX	0.949	string	2
CD4	CD69	0.948	string	2
CD4	CCR7	0.947	string	2
CD4	BTRC	0.947	string	2
CD4	TBX21	0.947	string	2
CD4	PDCD1LG2	0.945	string	2
CD4	HLA-DRB5	0.945	string	2
CD4	CUL1	0.944	string	2
CD4	ITGAM	0.943	string	2
CD4	TRAT1	0.942	string	2
CD4	PLAT	0.942	string	2
CD4	HLA-DMB	0.941	string	2
CD4	PRF1	0.94	string	2
CD4	CCL4	0.939	string	2
CD4	HLA-DOB	0.938	string	2
CD4	CD274	0.938	string	2
CD4	CD19	0.936	string	2
CD4	GZMB	0.936	string	2
CD4	IL2RA	0.936	string	2
CD4	HLA-DOA	0.934	string	2
CD4	CD38	0.932	string	2
CD4	SELL	0.931	string	2
CD4	IL13	0.931	string	2
CD4	CD27	0.931	string	2
CD4	IL5	0.93	string	2
CD4	ICOS	0.929	string	2
CD4	CD40	0.924	string	2
CD4	CD8B2	0.921	string	2
CD4	IL15	0.917	string	2
CD4	FN1	0.916	string	2
CD4	LAG3	0.914	string	2
CD4	RBX1	0.914	string	2
CD4	IL22	0.913	string	2
CD4	CD1D	0.911	string	2
CD4	IL7	0.909	string	2
CD4	CCR2	0.909	string	2
CD4	CXCR5	0.909	string	2
CD4	GOLPH3	0.905	string	2
CD4	FBXW11	0.903	string	2
CD4	TLR4	0.902	string	2
CD4	FCGR1A	0.902	string	2
CD4	CD7	0.901	string	2
PPP5C	HSP90AA1	0.997	string	2
PPP5C	HSP90AB1	0.997	string	2
PPP5C	CDC37	0.995	string	2
PPP5C	PTGES3	0.985	string	2
PPP5C	BRAF	0.979	string	2
PPP5C	MAP3K5	0.97	string	2
PPP5C	STIP1	0.962	string	2
PPP5C	TSC1	0.958	string	2
PPP5C	CCT4	0.926	string	2
PPP5C	CCT8	0.917	string	2
PPP5C	TCP1	0.917	string	2
PPP5C	CCT6A	0.913	string	2
PPP5C	CCT3	0.911	string	2
PPP5C	DNAJC9	0.909	string	2
PPP5C	CCT2	0.908	string	2
PPP5C	CCT7	0.908	string	2
PPP5C	CCT5	0.908	string	2
PPP5C	CCT6B	0.905	string	2
PPP5C	PSMG1	0.901	string	2
PPP5C	PSMG2	0.901	string	2
PSMA4	PSMD8	0.999	string	2
PSMA4	PSMC6	0.999	string	2
PSMA4	PSMB3	0.999	string	2
PSMA4	POMP	0.999	string	2
PSMA4	PSMA3	0.999	string	2
PSMA4	PSMC1	0.999	string	2
PSMA4	PSMB8	0.999	string	2
PSMA4	PSMD14	0.999	string	2
PSMA4	PSMB9	0.999	string	2
PSMA4	PSMD1	0.999	string	2
PSMA4	PSMB2	0.999	string	2
PSMA4	PSMA5	0.999	string	2
PSMA4	PSMD2	0.999	string	2
PSMA4	PSMD7	0.999	string	2
PSMA4	PSMB1	0.999	string	2
PSMA4	PSMA6	0.999	string	2
PSMA4	PSMD12	0.999	string	2
PSMA4	PSMA1	0.999	string	2
PSMA4	PSMB6	0.999	string	2
PSMA4	PSMB4	0.999	string	2
PSMA4	PSMB5	0.999	string	2
PSMA4	PSMD6	0.999	string	2
PSMA4	PSMB7	0.999	string	2
PSMA4	PSMA2	0.999	string	2
PSMA4	PSMD4	0.999	string	2
PSMA4	PSMC2	0.999	string	2
PSMA4	PSMA7	0.999	string	2
PSMA4	PSMC3	0.999	string	2
PSMA4	PSMC4	0.999	string	2
PSMA4	PSMC5	0.999	string	2
PSMA4	PSMD11	0.999	string	2
PSMA4	PSMD13	0.998	string	2
PSMA4	UCHL5	0.998	string	2
PSMA4	PSMD3	0.998	string	2
PSMA4	USP14	0.996	string	2
PSMA4	PSMA8	0.995	string	2
PSMA4	UBQLN4	0.995	string	2
PSMA4	PSMB10	0.995	string	2
PSMA4	DESI1	0.994	string	2
PSMA4	PSME1	0.992	string	2
PSMA4	PSME4	0.992	string	2
PSMA4	PSME2	0.99	string	2
PSMA4	PSMF1	0.982	string	2
PSMA4	RPS27A	0.978	string	2
PSMA4	ADRM1	0.978	string	2
PSMA4	PSMG2	0.971	string	2
PSMA4	UBB	0.97	string	2
PSMA4	UBC	0.966	string	2
PSMA4	CHRNA5	0.946	string	2
PSMA4	UBA52	0.943	string	2
PSMA4	CHRNA3	0.939	string	2
PSMA4	CHRNB4	0.938	string	2
PSMA4	AKIRIN2	0.927	string	2
PSMC4	PSMB2	0.999	string	2
PSMC4	PSMD1	0.999	string	2
PSMC4	PSMD14	0.999	string	2
PSMC4	PSMC1	0.999	string	2
PSMC4	PSMC6	0.999	string	2
PSMC4	PSMB3	0.999	string	2
PSMC4	PSMD8	0.999	string	2
PSMC4	PSMD12	0.999	string	2
PSMC4	PSMD13	0.999	string	2
PSMC4	PSMD5	0.999	string	2
PSMC4	PSMA6	0.999	string	2
PSMC4	PSMD7	0.999	string	2
PSMC4	PSMB1	0.999	string	2
PSMC4	PSMD10	0.999	string	2
PSMC4	PSMD2	0.999	string	2
PSMC4	PSMA5	0.999	string	2
PSMC4	UCHL5	0.999	string	2
PSMC4	PSMD6	0.999	string	2
PSMC4	PSMB4	0.999	string	2
PSMC4	PSMB5	0.999	string	2
PSMC4	ADRM1	0.999	string	2
PSMC4	PSMA1	0.999	string	2
PSMC4	PSMD11	0.999	string	2
PSMC4	PSMC5	0.999	string	2
PSMC4	PSMC3	0.999	string	2
PSMC4	PSMC2	0.999	string	2
PSMC4	PSMD4	0.999	string	2
PSMC4	USP14	0.999	string	2
PSMC4	PSMA2	0.999	string	2
PSMC4	PSMD3	0.999	string	2
PSMC4	PSMA3	0.998	string	2
PSMC4	PSMB7	0.998	string	2
PSMC4	PSMB6	0.998	string	2
PSMC4	PSMA7	0.998	string	2
PSMC4	PAAF1	0.997	string	2
PSMC4	DESI1	0.994	string	2
PSMC4	PSMB9	0.988	string	2
PSMC4	PSMB8	0.987	string	2
PSMC4	PSMA8	0.987	string	2
PSMC4	PSMD9	0.986	string	2
PSMC4	UBC	0.972	string	2
PSMC4	UBB	0.965	string	2
PSMC4	RPS27A	0.962	string	2
PSMC4	UBLCP1	0.944	string	2
PSMC4	UBA52	0.935	string	2
PSMC4	PSMB10	0.929	string	2
PSMC4	UBFD1	0.913	string	2
TNFRSF1A	LTA	0.999	string	2
TNFRSF1A	BIRC2	0.999	string	2
TNFRSF1A	TRAF5	0.999	string	2
TNFRSF1A	CYLD	0.999	string	2
TNFRSF1A	TRADD	0.999	string	2
TNFRSF1A	IKBKB	0.999	string	2
TNFRSF1A	TNF	0.999	string	2
TNFRSF1A	CHUK	0.999	string	2
TNFRSF1A	RIPK1	0.999	string	2
TNFRSF1A	TRAF2	0.999	string	2
TNFRSF1A	BIRC3	0.999	string	2
TNFRSF1A	TNFRSF1B	0.999	string	2
TNFRSF1A	IKBKG	0.999	string	2
TNFRSF1A	FAS	0.999	string	2
TNFRSF1A	MAP3K7	0.999	string	2
TNFRSF1A	FADD	0.999	string	2
TNFRSF1A	CASP8	0.998	string	2
TNFRSF1A	TAB2	0.998	string	2
TNFRSF1A	FASLG	0.998	string	2
TNFRSF1A	SHARPIN	0.998	string	2
TNFRSF1A	RBCK1	0.998	string	2
TNFRSF1A	TBK1	0.998	string	2
TNFRSF1A	TNFAIP3	0.998	string	2
TNFRSF1A	IKBKE	0.998	string	2
TNFRSF1A	RNF31	0.998	string	2
TNFRSF1A	IL6	0.997	string	2
TNFRSF1A	IL1B	0.997	string	2
TNFRSF1A	SPATA2	0.997	string	2
TNFRSF1A	TANK	0.997	string	2
TNFRSF1A	HTRA2	0.996	string	2
TNFRSF1A	TRAF6	0.996	string	2
TNFRSF1A	TRAF1	0.995	string	2
TNFRSF1A	TNIP1	0.995	string	2
TNFRSF1A	BAG4	0.995	string	2
TNFRSF1A	TNIP2	0.995	string	2
TNFRSF1A	NSMAF	0.994	string	2
TNFRSF1A	TNFSF10	0.993	string	2
TNFRSF1A	RFK	0.978	string	2
TNFRSF1A	TRAF3	0.977	string	2
TNFRSF1A	IL10	0.968	string	2
TNFRSF1A	TLR4	0.949	string	2
TNFRSF1A	DAXX	0.944	string	2
TNFRSF1A	SRC	0.934	string	2
TNFRSF1A	IL1A	0.934	string	2
TNFRSF1A	RIPK3	0.927	string	2
TNFRSF1A	IL1R1	0.921	string	2
TNFRSF1A	CD40	0.919	string	2
TNFRSF1A	IFNG	0.919	string	2
TNFRSF1A	NOX1	0.919	string	2
TNFRSF1A	TNFRSF10A	0.918	string	2
TNFRSF1A	IL6R	0.916	string	2
TNFRSF1A	CASP10	0.902	string	2
HSD17B2	HSD17B1	0.999	string	2
HSD17B2	HSD17B3	0.998	string	2
HSD17B2	DHRS11	0.995	string	2
HSD17B2	AKR1C3	0.982	string	2
HSD17B2	SRD5A1	0.977	string	2
HSD17B2	CYP17A1	0.972	string	2
HSD17B2	HSD3B2	0.97	string	2
HSD17B2	CYP19A1	0.966	string	2
HSD17B2	HSD3B1	0.964	string	2
HSD17B2	CYP1A1	0.962	string	2
HSD17B2	HSD17B7	0.961	string	2
HSD17B2	SULT1E1	0.959	string	2
HSD17B2	SRD5A2	0.958	string	2
HSD17B2	SRD5A3	0.953	string	2
HSD17B2	CYP1B1	0.941	string	2
HSD17B2	CYP11B1	0.938	string	2
HSD17B2	CYP3A5	0.937	string	2
HSD17B2	HSD17B8	0.935	string	2
HSD17B2	HSD17B12	0.934	string	2
HSD17B2	CYP3A4	0.932	string	2
HSD17B2	AKR1D1	0.931	string	2
HSD17B2	HSD17B4	0.928	string	2
HSD17B2	CYP11B2	0.927	string	2
HSD17B2	HSD17B6	0.92	string	2
AASDH	PALB2	0.988	string	2
AASDH	NDUFAB1	0.987	string	2
AASDH	AASDHPPT	0.982	string	2
AASDH	FASN	0.978	string	2
AASDH	SLC27A1	0.973	string	2
AASDH	ACSL1	0.941	string	2
AASDH	CPT2	0.921	string	2
AASDH	SLC25A20	0.917	string	2
AASDH	ACSL5	0.911	string	2
AASDH	ACSL3	0.908	string	2
CBX5	H3-5	0.999	string	2
CBX5	SUV39H1	0.999	string	2
CBX5	H3-2	0.999	string	2
CBX5	H3-4	0.999	string	2
CBX5	H3-3B	0.999	string	2
CBX5	H3C12	0.999	string	2
CBX5	H3C13	0.999	string	2
CBX5	TRIM28	0.997	string	2
CBX5	H3C1	0.988	string	2
CBX5	SETDB1	0.981	string	2
CBX5	DSN1	0.979	string	2
CBX5	CBX3	0.975	string	2
CBX5	CHAF1A	0.971	string	2
CBX5	NSL1	0.959	string	2
CBX5	H3-3A	0.959	string	2
CBX5	H3C2	0.958	string	2
CBX5	H3C14	0.955	string	2
CBX5	H3C3	0.953	string	2
CBX5	EHMT2	0.949	string	2
CBX5	H3C6	0.947	string	2
CBX5	H3C11	0.942	string	2
CBX5	H3C7	0.941	string	2
CBX5	H3C10	0.941	string	2
CBX5	CBX1	0.937	string	2
CBX5	H3C8	0.934	string	2
CBX5	H3C15	0.933	string	2
CBX5	H3C4	0.933	string	2
CBX5	DNMT3B	0.932	string	2
CBX5	RBBP4	0.931	string	2
CBX5	DNMT1	0.928	string	2
CBX5	LBR	0.927	string	2
CBX5	SMARCA4	0.923	string	2
CBX5	SP100	0.92	string	2
CBX5	CHAF1B	0.911	string	2
CBX5	H4C6	0.911	string	2
CBX5	PRR14	0.907	string	2
PSMD8	PSMC1	0.999	string	2
PSMD8	PSMD14	0.999	string	2
PSMD8	PSMD1	0.999	string	2
PSMD8	PSMB2	0.999	string	2
PSMD8	PSMC6	0.999	string	2
PSMD8	PSMB3	0.999	string	2
PSMD8	PSMA3	0.999	string	2
PSMD8	PSMD7	0.999	string	2
PSMD8	PSMD5	0.999	string	2
PSMD8	PSMD13	0.999	string	2
PSMD8	PSMD12	0.999	string	2
PSMD8	PSMD2	0.999	string	2
PSMD8	PSMB4	0.999	string	2
PSMD8	PSMD6	0.999	string	2
PSMD8	UCHL5	0.999	string	2
PSMD8	PSMA1	0.999	string	2
PSMD8	PSMB6	0.999	string	2
PSMD8	ADRM1	0.999	string	2
PSMD8	PSMC3	0.999	string	2
PSMD8	PSMC5	0.999	string	2
PSMD8	PSMD11	0.999	string	2
PSMD8	PSMD3	0.999	string	2
PSMD8	PSMA2	0.999	string	2
PSMD8	PSMD4	0.999	string	2
PSMD8	PSMC2	0.999	string	2
PSMD8	PSMB1	0.998	string	2
PSMD8	PSMA6	0.998	string	2
PSMD8	PSMA5	0.998	string	2
PSMD8	USP14	0.998	string	2
PSMD8	PSMA7	0.997	string	2
PSMD8	UBQLN4	0.996	string	2
PSMD8	SEM1	0.994	string	2
PSMD8	DESI1	0.994	string	2
PSMD8	PSMB7	0.993	string	2
PSMD8	PSMB5	0.991	string	2
PSMD8	PSMD10	0.988	string	2
PSMD8	PSMB9	0.983	string	2
PSMD8	PSMD9	0.98	string	2
PSMD8	NOB1	0.968	string	2
PSMD8	RPS27A	0.964	string	2
PSMD8	PSMA8	0.962	string	2
PSMD8	PSMB8	0.957	string	2
PSMD8	UBC	0.954	string	2
PSMD8	UBB	0.954	string	2
PSMD8	NINJ1	0.94	string	2
PSMD8	ECPAS	0.936	string	2
PSMD8	UBA52	0.936	string	2
PSMD8	KIAA2012	0.935	string	2
PSMD8	KATNAL2	0.927	string	2
PSMD8	PSMB10	0.922	string	2
PSMD8	PSME3	0.914	string	2
PSMD8	CSF3	0.904	string	2
OSM	OSMR	0.999	string	2
OSM	LIFR	0.999	string	2
OSM	IL6ST	0.998	string	2
OSM	LIF	0.966	string	2
OSM	IL6	0.963	string	2
OSM	IL11	0.936	string	2
OSM	CTF1	0.93	string	2
OSM	IL31RA	0.928	string	2
OSM	JAK2	0.919	string	2
OSM	STAT3	0.911	string	2
OSM	JAK1	0.907	string	2
ST13	HSPA8	0.999	string	2
ST13	HSP90AA1	0.997	string	2
ST13	HSPA4	0.997	string	2
ST13	HSP90AB1	0.995	string	2
ST13	DNAJB1	0.943	string	2
RIPK3	TRADD	0.999	string	2
RIPK3	RIPK1	0.999	string	2
RIPK3	MLKL	0.999	string	2
RIPK3	CASP8	0.999	string	2
RIPK3	FADD	0.999	string	2
RIPK3	TNF	0.998	string	2
RIPK3	ZBP1	0.996	string	2
RIPK3	CFLAR	0.992	string	2
RIPK3	TICAM1	0.983	string	2
RIPK3	BIRC2	0.976	string	2
RIPK3	GLUL	0.974	string	2
RIPK3	GLUD1	0.973	string	2
RIPK3	PYGL	0.966	string	2
RIPK3	HSP90AA1	0.966	string	2
RIPK3	HSP90AB1	0.964	string	2
RIPK3	TLR3	0.964	string	2
RIPK3	TRAF2	0.963	string	2
RIPK3	BIRC3	0.963	string	2
RIPK3	PYGM	0.958	string	2
RIPK3	PYGB	0.957	string	2
RIPK3	DNM1L	0.942	string	2
RIPK3	TNFAIP3	0.939	string	2
RIPK3	CYBB	0.934	string	2
RIPK3	CASP1	0.925	string	2
RIPK3	PELI1	0.907	string	2
RIPK3	CAMK2A	0.902	string	2
RIPK3	CAMK2B	0.902	string	2
RIPK3	GLUD2	0.9	string	2
SUPT16H	SSRP1	0.999	string	2
SUPT16H	SUPT5H	0.998	string	2
SUPT16H	LEO1	0.997	string	2
SUPT16H	CTR9	0.997	string	2
SUPT16H	RTF1	0.997	string	2
SUPT16H	SUPT6H	0.997	string	2
SUPT16H	CDC73	0.995	string	2
SUPT16H	PAF1	0.994	string	2
SUPT16H	POLR2C	0.994	string	2
SUPT16H	POLR2A	0.994	string	2
SUPT16H	H3C12	0.992	string	2
SUPT16H	SUPT4H1	0.991	string	2
SUPT16H	H4C6	0.99	string	2
SUPT16H	POLR2B	0.988	string	2
SUPT16H	H3C1	0.978	string	2
SUPT16H	POLR2D	0.978	string	2
SUPT16H	H2BC21	0.976	string	2
SUPT16H	H2AC18	0.972	string	2
SUPT16H	H2AC20	0.972	string	2
SUPT16H	POLR2E	0.966	string	2
SUPT16H	H3C3	0.965	string	2
SUPT16H	POLR2G	0.963	string	2
SUPT16H	H3C6	0.96	string	2
SUPT16H	POLR2K	0.954	string	2
SUPT16H	H4C12	0.953	string	2
SUPT16H	H4C13	0.953	string	2
SUPT16H	H3C11	0.953	string	2
SUPT16H	H3C2	0.953	string	2
SUPT16H	H4C9	0.953	string	2
SUPT16H	H4C2	0.953	string	2
SUPT16H	H3C8	0.952	string	2
SUPT16H	H3C7	0.951	string	2
SUPT16H	H3C10	0.951	string	2
SUPT16H	H4C3	0.95	string	2
SUPT16H	H4C1	0.948	string	2
SUPT16H	IWS1	0.948	string	2
SUPT16H	H4C15	0.948	string	2
SUPT16H	H4C4	0.948	string	2
SUPT16H	H4C14	0.948	string	2
SUPT16H	H4-16	0.948	string	2
SUPT16H	H4C11	0.948	string	2
SUPT16H	H4C8	0.948	string	2
SUPT16H	H4C5	0.948	string	2
SUPT16H	POLR2I	0.947	string	2
SUPT16H	H3C4	0.945	string	2
SUPT16H	H2BC4	0.945	string	2
SUPT16H	H2BC8	0.944	string	2
SUPT16H	H2AC6	0.944	string	2
SUPT16H	H2BC10	0.943	string	2
SUPT16H	H2BC6	0.942	string	2
SUPT16H	POLR2L	0.94	string	2
SUPT16H	POLR2H	0.936	string	2
SUPT16H	H2BC7	0.936	string	2
SUPT16H	POLR2F	0.935	string	2
SUPT16H	CSNK2A1	0.927	string	2
SUPT16H	CSNK2B	0.926	string	2
SUPT16H	H2AX	0.918	string	2
SUPT16H	ELOF1	0.917	string	2
PSMA3	PSMC6	0.999	string	2
PSMA3	PSMB3	0.999	string	2
PSMA3	POMP	0.999	string	2
PSMA3	PSMD14	0.999	string	2
PSMA3	PSMB9	0.999	string	2
PSMA3	PSMC1	0.999	string	2
PSMA3	PSMB8	0.999	string	2
PSMA3	PSMD1	0.999	string	2
PSMA3	PSMB2	0.999	string	2
PSMA3	PSMA5	0.999	string	2
PSMA3	PSMD2	0.999	string	2
PSMA3	PSMD7	0.999	string	2
PSMA3	PSMB1	0.999	string	2
PSMA3	PSMA6	0.999	string	2
PSMA3	PSMD12	0.999	string	2
PSMA3	PSMA1	0.999	string	2
PSMA3	PSMB6	0.999	string	2
PSMA3	PSMB4	0.999	string	2
PSMA3	PSMB5	0.999	string	2
PSMA3	PSMD6	0.999	string	2
PSMA3	PSMB7	0.999	string	2
PSMA3	PSMB10	0.999	string	2
PSMA3	PSMA2	0.999	string	2
PSMA3	PSMC2	0.999	string	2
PSMA3	PSMA7	0.999	string	2
PSMA3	PSMD4	0.999	string	2
PSMA3	PSMC3	0.999	string	2
PSMA3	PSMD11	0.999	string	2
PSMA3	PSMD13	0.998	string	2
PSMA3	UCHL5	0.998	string	2
PSMA3	PSMD3	0.998	string	2
PSMA3	PSMC5	0.998	string	2
PSMA3	PSME4	0.997	string	2
PSMA3	PSMA8	0.995	string	2
PSMA3	UBQLN4	0.995	string	2
PSMA3	PSME2	0.992	string	2
PSMA3	USP14	0.991	string	2
PSMA3	PSME1	0.986	string	2
PSMA3	PSMG2	0.981	string	2
PSMA3	RPS27A	0.974	string	2
PSMA3	ADRM1	0.96	string	2
PSMA3	UBC	0.948	string	2
PSMA3	UBB	0.945	string	2
PSMA3	PSMF1	0.942	string	2
PSMA3	UBA52	0.94	string	2
PSMA3	PSMB11	0.931	string	2
AHSA1	HSP90AB1	0.999	string	2
AHSA1	HSP90AA1	0.999	string	2
AHSA1	STIP1	0.998	string	2
AHSA1	PTGES3	0.994	string	2
AHSA1	HSPA4	0.971	string	2
AHSA1	CDC37	0.968	string	2
AHSA1	PPID	0.95	string	2
AHSA1	HSPA8	0.93	string	2
AHSA1	HSP90B1	0.915	string	2
AHSA1	DNAJA1	0.902	string	2
NFKBIA	SKP1	0.999	string	2
NFKBIA	IKBKG	0.999	string	2
NFKBIA	NFKBIB	0.999	string	2
NFKBIA	REL	0.999	string	2
NFKBIA	BTRC	0.999	string	2
NFKBIA	CHUK	0.999	string	2
NFKBIA	IKBKB	0.999	string	2
NFKBIA	NFKB1	0.999	string	2
NFKBIA	CUL1	0.999	string	2
NFKBIA	RELA	0.999	string	2
NFKBIA	NFKB2	0.995	string	2
NFKBIA	RELB	0.995	string	2
NFKBIA	UBE2D2	0.994	string	2
NFKBIA	FBXW11	0.989	string	2
NFKBIA	NFKBIE	0.987	string	2
NFKBIA	RBX1	0.987	string	2
NFKBIA	RPS27A	0.986	string	2
NFKBIA	ARRB2	0.986	string	2
NFKBIA	TNF	0.967	string	2
NFKBIA	TRAF6	0.966	string	2
NFKBIA	PRKACG	0.965	string	2
NFKBIA	PRKACA	0.965	string	2
NFKBIA	PRKACB	0.965	string	2
NFKBIA	CSNK2B	0.964	string	2
NFKBIA	UBE2D1	0.964	string	2
NFKBIA	UBC	0.963	string	2
NFKBIA	UBB	0.957	string	2
NFKBIA	UBA52	0.952	string	2
NFKBIA	IL1B	0.945	string	2
NFKBIA	ARRB1	0.936	string	2
NFKBIA	CSNK2A1	0.929	string	2
NFKBIA	CSNK2A2	0.927	string	2
NFKBIA	IL6	0.927	string	2
NFKBIA	NEDD8	0.926	string	2
NFKBIA	USP11	0.922	string	2
NFKBIA	IRAK1	0.922	string	2
NFKBIA	SFN	0.918	string	2
NFKBIA	STAT1	0.917	string	2
NFKBIA	TP53	0.915	string	2
NFKBIA	TBK1	0.91	string	2
NFKBIA	UBE2D4	0.908	string	2
NFKBIA	JUN	0.908	string	2
NFKBIA	CSNK2A3	0.907	string	2
NFKBIA	BCL3	0.904	string	2
NFKBIA	MYD88	0.903	string	2
NFKBIA	FBXO22	0.901	string	2
PSME2	PSME1	0.999	string	2
PSME2	PSMA2	0.994	string	2
PSME2	PSMB7	0.993	string	2
PSME2	PSMA5	0.993	string	2
PSME2	PSMA1	0.992	string	2
PSME2	PSMB4	0.992	string	2
PSME2	PSMB9	0.99	string	2
PSME2	PSMB5	0.989	string	2
PSME2	PSMB8	0.987	string	2
PSME2	PSMB1	0.986	string	2
PSME2	PSMA6	0.982	string	2
PSME2	PSMB3	0.981	string	2
PSME2	PSMB2	0.981	string	2
PSME2	PSMB10	0.979	string	2
PSME2	PSMA7	0.976	string	2
PSME2	PSMB6	0.961	string	2
PSME2	IFNG	0.96	string	2
PSME2	PSMD14	0.929	string	2
PSME2	PSME3	0.923	string	2
PSME2	TNF	0.919	string	2
EEF1A2	EEF1B2	0.996	string	2
EEF1A2	EEF1A1	0.994	string	2
EEF1A2	EEF1G	0.979	string	2
EEF1A2	EEF1D	0.96	string	2
EEF1A2	ST6GALNAC1	0.944	string	2
EEF1A2	RAN	0.942	string	2
EEF1A2	ETF1	0.931	string	2
EEF1A2	PAPSS1	0.919	string	2
EEF1A2	PAPSS2	0.915	string	2
EEF1A2	HSF1	0.912	string	2
EEF1A2	HLA-DRB1	0.908	string	2
EEF1A2	PTPN6	0.903	string	2
EEF1A2	HLA-DRA	0.9	string	2
CSNK2A1	CSNK2B	0.999	string	2
CSNK2A1	CSNK2A2	0.993	string	2
CSNK2A1	OGT	0.982	string	2
CSNK2A1	HDAC2	0.972	string	2
CSNK2A1	PTEN	0.971	string	2
CSNK2A1	DVL1	0.968	string	2
CSNK2A1	HDAC1	0.961	string	2
CSNK2A1	TP53	0.959	string	2
CSNK2A1	RRP7A	0.955	string	2
CSNK2A1	SIN3A	0.95	string	2
CSNK2A1	DVL3	0.949	string	2
CSNK2A1	CSNK2B-2	0.944	string	2
CSNK2A1	PRNP	0.939	string	2
CSNK2A1	SSRP1	0.936	string	2
CSNK2A1	CTNNB1	0.936	string	2
CSNK2A1	PCGF5	0.922	string	2
CSNK2A1	RNF2	0.911	string	2
CSNK2A1	NOL6	0.91	string	2
CSNK2A1	CHD4	0.909	string	2
CSNK2A1	FUNDC1	0.909	string	2
CSNK2A1	CSNK2A3	0.9	string	2
PSMD7	ADRM1	0.999	string	2
PSMD7	PSMA1	0.999	string	2
PSMD7	UCHL5	0.999	string	2
PSMD7	PSMB7	0.999	string	2
PSMD7	PSMD6	0.999	string	2
PSMD7	PSMB4	0.999	string	2
PSMD7	PSMD4	0.999	string	2
PSMD7	PSMC2	0.999	string	2
PSMD7	PSMD3	0.999	string	2
PSMD7	PSMA2	0.999	string	2
PSMD7	USP14	0.999	string	2
PSMD7	PSMD11	0.999	string	2
PSMD7	PSMC3	0.999	string	2
PSMD7	PSMC5	0.999	string	2
PSMD7	PSMB3	0.999	string	2
PSMD7	PSMC6	0.999	string	2
PSMD7	PSMB2	0.999	string	2
PSMD7	PSMD1	0.999	string	2
PSMD7	PSMC1	0.999	string	2
PSMD7	PSMD14	0.999	string	2
PSMD7	PSMD2	0.999	string	2
PSMD7	PSMA5	0.999	string	2
PSMD7	PSMD12	0.999	string	2
PSMD7	PSMD13	0.999	string	2
PSMD7	PSMD5	0.999	string	2
PSMD7	PSMB1	0.999	string	2
PSMD7	PSMA6	0.998	string	2
PSMD7	PSMA7	0.997	string	2
PSMD7	PSMD10	0.996	string	2
PSMD7	PSMB5	0.995	string	2
PSMD7	PSMB6	0.993	string	2
PSMD7	PSMB9	0.975	string	2
PSMD7	PAAF1	0.971	string	2
PSMD7	COPS5	0.969	string	2
PSMD7	PSMA8	0.964	string	2
PSMD7	PSMD9	0.961	string	2
PSMD7	UBC	0.961	string	2
PSMD7	RPS27A	0.96	string	2
PSMD7	UBB	0.952	string	2
PSMD7	EIF3D	0.947	string	2
PSMD7	EIF3H	0.94	string	2
PSMD7	UBA52	0.938	string	2
PSMD7	ECPAS	0.932	string	2
PSMD7	PSMB8	0.932	string	2
PSMD7	PSMB10	0.916	string	2
STUB1	HSPA8	0.999	string	2
STUB1	UBE2D1	0.999	string	2
STUB1	HSP90AA1	0.999	string	2
STUB1	HSP90AB1	0.999	string	2
STUB1	HSPA4	0.999	string	2
STUB1	BAG3	0.999	string	2
STUB1	UBE2N	0.999	string	2
STUB1	BAG2	0.997	string	2
STUB1	UBE2V1	0.996	string	2
STUB1	UBE2D3	0.996	string	2
STUB1	HSPB8	0.993	string	2
STUB1	UBE2D2	0.986	string	2
STUB1	ATXN3	0.983	string	2
STUB1	ERBB2	0.982	string	2
STUB1	DNAJB1	0.979	string	2
STUB1	SMAD3	0.979	string	2
STUB1	HSPA1B	0.979	string	2
STUB1	TP53	0.968	string	2
STUB1	BAG1	0.963	string	2
STUB1	HSPBP1	0.962	string	2
STUB1	PRKN	0.946	string	2
STUB1	MAPT	0.944	string	2
STUB1	ESR1	0.936	string	2
STUB1	UBE4A	0.934	string	2
STUB1	AR	0.931	string	2
STUB1	EGFR	0.93	string	2
STUB1	UBE4B	0.92	string	2
STUB1	DNAJB6	0.92	string	2
STUB1	BAG5	0.919	string	2
STUB1	UBE2W	0.917	string	2
STUB1	UBE2S	0.909	string	2
STUB1	DNAJA1	0.908	string	2
STUB1	PTEN	0.904	string	2
STUB1	RNF5	0.903	string	2
STUB1	HSPA2	0.901	string	2
AGO2	DDX6	0.999	string	2
AGO2	DICER1	0.999	string	2
AGO2	DHX9	0.999	string	2
AGO2	GEMIN4	0.999	string	2
AGO2	TNRC6A	0.999	string	2
AGO2	DDX20	0.999	string	2
AGO2	AGO1	0.999	string	2
AGO2	TARBP2	0.999	string	2
AGO2	FMR1	0.998	string	2
AGO2	TNRC6B	0.998	string	2
AGO2	HSP90AA1	0.997	string	2
AGO2	ELAVL1	0.997	string	2
AGO2	AGO3	0.997	string	2
AGO2	MOV10	0.997	string	2
AGO2	FXR1	0.996	string	2
AGO2	DROSHA	0.995	string	2
AGO2	NPM1	0.992	string	2
AGO2	TNRC6C	0.992	string	2
AGO2	HSP90AB1	0.992	string	2
AGO2	EIF4E	0.991	string	2
AGO2	XPO5	0.99	string	2
AGO2	AGO4	0.988	string	2
AGO2	DGCR8	0.984	string	2
AGO2	RBM4	0.978	string	2
AGO2	IPO8	0.975	string	2
AGO2	DCP2	0.972	string	2
AGO2	PRKRA	0.965	string	2
AGO2	RBM8A	0.961	string	2
AGO2	TSNAX	0.958	string	2
AGO2	EGFR	0.956	string	2
AGO2	TSN	0.952	string	2
AGO2	NCBP1	0.95	string	2
AGO2	UPF1	0.949	string	2
AGO2	FXR2	0.949	string	2
AGO2	HTT	0.946	string	2
AGO2	SND1	0.943	string	2
AGO2	TRIM71	0.94	string	2
AGO2	LIMD1	0.936	string	2
AGO2	NCBP2	0.922	string	2
AGO2	PABPC1	0.919	string	2
AGO2	CLP1	0.917	string	2
AGO2	NCBP3	0.915	string	2
AGO2	ZFP36	0.914	string	2
AGO2	EIF4E2	0.911	string	2
AGO2	YBX1	0.91	string	2
AGO2	DDX5	0.907	string	2
AGO2	RNMT	0.904	string	2
AGO2	POP1	0.903	string	2
AGO2	RPP40	0.903	string	2
AGO2	RPP38	0.903	string	2
AGO2	PRORP	0.903	string	2
AGO2	HSD17B10	0.902	string	2
AGO2	RPP14	0.901	string	2
AGO2	POP4	0.901	string	2
AGO2	RPP25	0.9	string	2
AGO2	POP5	0.9	string	2
AGO2	RAMAC	0.9	string	2
AGO2	RPP30	0.9	string	2
AGO2	RPP21	0.9	string	2
AGO2	POP7	0.9	string	2
RIPK2	XIAP	0.999	string	2
RIPK2	NOD1	0.999	string	2
RIPK2	NOD2	0.999	string	2
RIPK2	CARD6	0.997	string	2
RIPK2	TRAF3	0.995	string	2
RIPK2	TRAF6	0.993	string	2
RIPK2	BIRC2	0.993	string	2
RIPK2	NGFR	0.993	string	2
RIPK2	IKBKG	0.993	string	2
RIPK2	TRAF2	0.988	string	2
RIPK2	BIRC3	0.988	string	2
RIPK2	TAB2	0.982	string	2
RIPK2	TAB3	0.974	string	2
RIPK2	TRAF5	0.972	string	2
RIPK2	CARD9	0.971	string	2
RIPK2	TNFAIP3	0.962	string	2
RIPK2	TAB1	0.959	string	2
RIPK2	RNF31	0.956	string	2
RIPK2	ARHGEF2	0.948	string	2
RIPK2	CHUK	0.943	string	2
RIPK2	IKBKB	0.942	string	2
RIPK2	HSP90AA1	0.938	string	2
RIPK2	SHARPIN	0.935	string	2
RIPK2	RBCK1	0.934	string	2
RIPK2	MAPK8	0.932	string	2
RIPK2	HSP90AB1	0.928	string	2
RIPK2	MAPK9	0.928	string	2
RIPK2	HSP90B1	0.917	string	2
RIPK2	TRIP6	0.912	string	2
EXOSC5	EXOSC1	0.999	string	2
EXOSC5	MPHOSPH6	0.999	string	2
EXOSC5	C1D	0.999	string	2
EXOSC5	DIS3	0.999	string	2
EXOSC5	EXOSC9	0.999	string	2
EXOSC5	EXOSC10	0.999	string	2
EXOSC5	EXOSC3	0.999	string	2
EXOSC5	EXOSC2	0.999	string	2
EXOSC5	EXOSC7	0.999	string	2
EXOSC5	EXOSC4	0.999	string	2
EXOSC5	DIS3L	0.999	string	2
EXOSC5	EXOSC6	0.999	string	2
EXOSC5	EXOSC8	0.999	string	2
EXOSC5	MTREX	0.999	string	2
EXOSC5	CDK5RAP1	0.994	string	2
EXOSC5	HBS1L	0.988	string	2
EXOSC5	PNPT1	0.973	string	2
EXOSC5	DIS3L2	0.965	string	2
EXOSC5	ZFC3H1	0.963	string	2
EXOSC5	SKIV2L	0.946	string	2
EXOSC5	WDR75	0.91	string	2
EXOSC5	SUPV3L1	0.91	string	2
EXOSC5	IMP3	0.904	string	2
EBI3	IL27	0.999	string	2
EBI3	IL27RA	0.99	string	2
EBI3	IL12A	0.985	string	2
EBI3	IL6ST	0.963	string	2
EBI3	CANX	0.926	string	2
CDC37	HSP90AA1	0.999	string	2
CDC37	HSP90AB1	0.999	string	2
CDC37	CDK4	0.999	string	2
CDC37	PTGES3	0.997	string	2
CDC37	STIP1	0.995	string	2
CDC37	AKT1	0.995	string	2
CDC37	HSPA4	0.995	string	2
CDC37	RAF1	0.993	string	2
CDC37	BRAF	0.991	string	2
CDC37	PINK1	0.979	string	2
CDC37	CHUK	0.979	string	2
CDC37	HSP90B1	0.973	string	2
CDC37	IKBKB	0.965	string	2
CDC37	CDK6	0.964	string	2
CDC37	AKT3	0.963	string	2
CDC37	TSC1	0.958	string	2
CDC37	DNAJB1	0.952	string	2
CDC37	AKT2	0.944	string	2
CDC37	CCT4	0.937	string	2
CDC37	CDK9	0.935	string	2
CDC37	CCT2	0.932	string	2
CDC37	CCT7	0.931	string	2
CDC37	CCT6A	0.931	string	2
CDC37	CCT8	0.929	string	2
CDC37	TCP1	0.929	string	2
CDC37	CCT5	0.928	string	2
CDC37	LRRK2	0.925	string	2
CDC37	CCT3	0.924	string	2
CDC37	IKBKG	0.921	string	2
CDC37	EGFR	0.917	string	2
CDC37	CCT6B	0.911	string	2
CDC37	DNAJC9	0.91	string	2
CDC37	PSMG1	0.902	string	2
CDC37	HSPA8	0.902	string	2
CDC37	PSMG2	0.9	string	2
PIK3R2	PIK3R3	0.999	string	2
PIK3R2	PIK3R1	0.999	string	2
PIK3R2	PIK3CB	0.999	string	2
PIK3R2	PIK3CD	0.999	string	2
PIK3R2	PIK3CA	0.999	string	2
PIK3R2	PIK3CG	0.999	string	2
PIK3R2	EGFR	0.993	string	2
PIK3R2	IRS1	0.99	string	2
PIK3R2	ERBB3	0.99	string	2
PIK3R2	IRS4	0.986	string	2
PIK3R2	ERBB2	0.985	string	2
PIK3R2	PTEN	0.985	string	2
PIK3R2	IRS2	0.981	string	2
PIK3R2	PIK3R5	0.98	string	2
PIK3R2	ERBB4	0.977	string	2
PIK3R2	CDC42	0.974	string	2
PIK3R2	GAB2	0.973	string	2
PIK3R2	AKT1	0.971	string	2
PIK3R2	PDGFRB	0.971	string	2
PIK3R2	KIT	0.968	string	2
PIK3R2	AKT3	0.967	string	2
PIK3R2	SYK	0.964	string	2
PIK3R2	IGF1R	0.964	string	2
PIK3R2	AKT2	0.963	string	2
PIK3R2	PTPN11	0.96	string	2
PIK3R2	SRC	0.959	string	2
PIK3R2	INPP4B	0.957	string	2
PIK3R2	FYN	0.955	string	2
PIK3R2	CBL	0.954	string	2
PIK3R2	INPPL1	0.954	string	2
PIK3R2	ZAP70	0.952	string	2
PIK3R2	PIK3C2B	0.952	string	2
PIK3R2	PIK3C2G	0.948	string	2
PIK3R2	FGFR1	0.948	string	2
PIK3R2	KRAS	0.946	string	2
PIK3R2	INPP4A	0.946	string	2
PIK3R2	PIK3R6	0.945	string	2
PIK3R2	PDPK1	0.945	string	2
PIK3R2	MTOR	0.944	string	2
PIK3R2	CD19	0.944	string	2
PIK3R2	HCST	0.943	string	2
PIK3R2	PIK3C2A	0.939	string	2
PIK3R2	PDGFRA	0.938	string	2
PIK3R2	CBLB	0.937	string	2
PIK3R2	XBP1	0.936	string	2
PIK3R2	PTK2	0.934	string	2
PIK3R2	CD28	0.933	string	2
PIK3R2	PIK3C3	0.933	string	2
PIK3R2	NRAS	0.933	string	2
PIK3R2	ILK	0.933	string	2
PIK3R2	KDR	0.931	string	2
PIK3R2	NTRK1	0.93	string	2
PIK3R2	LYN	0.93	string	2
PIK3R2	HRAS	0.93	string	2
PIK3R2	PI4KB	0.929	string	2
PIK3R2	PI4K2A	0.928	string	2
PIK3R2	PIP5K1C	0.928	string	2
PIK3R2	ALK	0.927	string	2
PIK3R2	PLCG1	0.926	string	2
PIK3R2	GAB1	0.926	string	2
PIK3R2	JAK3	0.925	string	2
PIK3R2	PIP5K1A	0.925	string	2
PIK3R2	PI4KA	0.925	string	2
PIK3R2	RAF1	0.925	string	2
PIK3R2	BTK	0.925	string	2
PIK3R2	PIP4K2C	0.924	string	2
PIK3R2	CRK	0.923	string	2
PIK3R2	PIP4K2A	0.923	string	2
PIK3R2	JAK2	0.923	string	2
PIK3R2	PIK3AP1	0.923	string	2
PIK3R2	FLT3	0.922	string	2
PIK3R2	PI4K2B	0.921	string	2
PIK3R2	RAC2	0.921	string	2
PIK3R2	JAK1	0.921	string	2
PIK3R2	INPP5D	0.92	string	2
PIK3R2	RAC3	0.917	string	2
PIK3R2	THRA	0.917	string	2
PIK3R2	PRKCI	0.916	string	2
PIK3R2	PRKCD	0.916	string	2
PIK3R2	ICOS	0.915	string	2
PIK3R2	ITGB1	0.915	string	2
PIK3R2	PIP4K2B	0.915	string	2
PIK3R2	RRAS	0.914	string	2
PIK3R2	PRKCZ	0.914	string	2
PIK3R2	PIKFYVE	0.914	string	2
PIK3R2	PIP5K1B	0.913	string	2
PIK3R2	VAV2	0.913	string	2
PIK3R2	PTPN6	0.912	string	2
PIK3R2	TLR4	0.912	string	2
PIK3R2	PGR	0.912	string	2
PIK3R2	RAP1A	0.912	string	2
PIK3R2	ITK	0.911	string	2
PIK3R2	THRB	0.911	string	2
PIK3R2	PLCG2	0.91	string	2
PIK3R2	CDIPT	0.909	string	2
PIK3R2	TXK	0.909	string	2
PIK3R2	VAV1	0.909	string	2
PIK3R2	ITGB2	0.909	string	2
PIK3R2	RAP1B	0.908	string	2
PIK3R2	EML4	0.908	string	2
PIK3R2	DAB1	0.908	string	2
PIK3R2	PREX1	0.908	string	2
PIK3R2	VAV3	0.907	string	2
PIK3R2	ITGA2	0.907	string	2
PIK3R2	NGFR	0.906	string	2
PIK3R2	IFNGR1	0.905	string	2
PIK3R2	IL6ST	0.905	string	2
PIK3R2	FCER1G	0.905	string	2
PIK3R2	TRAF2	0.905	string	2
PIK3R2	MRAS	0.903	string	2
PIK3R2	ITGAM	0.903	string	2
PIK3R2	OGT	0.902	string	2
PIK3R2	GNAI2	0.902	string	2
PIK3R2	GNAI1	0.902	string	2
PIK3R2	PIP4P2	0.901	string	2
PIK3R2	PIP4P1	0.9	string	2
PIK3R2	GNAI3	0.9	string	2
PIK3R2	INPP5F	0.9	string	2
PIK3R2	KISS1R	0.9	string	2
PIK3R2	LIFR	0.9	string	2
CYP3A5	UGT1A4	0.978	string	2
CYP3A5	UGT1A8	0.976	string	2
CYP3A5	UGT1A6	0.975	string	2
CYP3A5	UGT1A1	0.974	string	2
CYP3A5	UGT1A7	0.974	string	2
CYP3A5	UGT2B7	0.974	string	2
CYP3A5	UGT1A10	0.974	string	2
CYP3A5	CYP1A1	0.971	string	2
CYP3A5	CYP2B6	0.97	string	2
CYP3A5	CYP3A7	0.968	string	2
CYP3A5	UGT1A9	0.966	string	2
CYP3A5	UGT1A3	0.965	string	2
CYP3A5	UGT2B15	0.965	string	2
CYP3A5	CYP2C9	0.96	string	2
CYP3A5	CYP1A2	0.96	string	2
CYP3A5	CYP2C19	0.959	string	2
CYP3A5	CYP2C8	0.956	string	2
CYP3A5	UGT2B4	0.955	string	2
CYP3A5	UGT2B17	0.954	string	2
CYP3A5	CYP2C18	0.954	string	2
CYP3A5	POR	0.953	string	2
CYP3A5	CYP2A6	0.953	string	2
CYP3A5	CYP4A11	0.952	string	2
CYP3A5	UGT2B10	0.952	string	2
CYP3A5	UGT2B28	0.952	string	2
CYP3A5	UGT2A2	0.951	string	2
CYP3A5	CYP2A13	0.95	string	2
CYP3A5	UGT2A3	0.95	string	2
CYP3A5	CYP3A4	0.95	string	2
CYP3A5	UGT1A5	0.949	string	2
CYP3A5	UGT2B11	0.949	string	2
CYP3A5	EPHX1	0.946	string	2
CYP3A5	CYP19A1	0.944	string	2
CYP3A5	CYP2S1	0.943	string	2
CYP3A5	CYP4A22	0.942	string	2
CYP3A5	CYP17A1	0.941	string	2
CYP3A5	CYP26A1	0.94	string	2
CYP3A5	HSD3B1	0.937	string	2
CYP3A5	HSD3B2	0.937	string	2
CYP3A5	AOX1	0.937	string	2
CYP3A5	CYP7A1	0.936	string	2
CYP3A5	CYP26B1	0.935	string	2
CYP3A5	SULT1E1	0.934	string	2
CYP3A5	ALDH1A1	0.933	string	2
CYP3A5	SULT2B1	0.932	string	2
CYP3A5	CYP26C1	0.931	string	2
CYP3A5	AKR1C3	0.929	string	2
CYP3A5	HSD17B1	0.928	string	2
CYP3A5	HSD17B12	0.927	string	2
CYP3A5	ALDH1A3	0.926	string	2
CYP3A5	PPIG	0.926	string	2
CYP3A5	HSD17B8	0.923	string	2
CYP3A5	ALDH1A2	0.922	string	2
CYP3A5	HSD17B7	0.922	string	2
CYP3A5	ABCB1	0.92	string	2
CYP3A5	HSD17B6	0.92	string	2
CYP3A5	ENSP00000480571	0.914	string	2
CYP3A5	STS	0.907	string	2
PSMA2	PSMB1	0.999	string	2
PSMA2	PSMD12	0.999	string	2
PSMA2	PSMA6	0.999	string	2
PSMA2	PSMD13	0.999	string	2
PSMA2	PSMA5	0.999	string	2
PSMA2	PSMD2	0.999	string	2
PSMA2	PSMD1	0.999	string	2
PSMA2	PSMB8	0.999	string	2
PSMA2	PSMC1	0.999	string	2
PSMA2	PSMD14	0.999	string	2
PSMA2	PSMB9	0.999	string	2
PSMA2	PSMB2	0.999	string	2
PSMA2	PSMB3	0.999	string	2
PSMA2	PSMC6	0.999	string	2
PSMA2	PSMC3	0.999	string	2
PSMA2	PSMC5	0.999	string	2
PSMA2	PSMD11	0.999	string	2
PSMA2	PSMB10	0.999	string	2
PSMA2	PSMD4	0.999	string	2
PSMA2	PSMC2	0.999	string	2
PSMA2	PSMA7	0.999	string	2
PSMA2	PSMD3	0.999	string	2
PSMA2	PSMD6	0.999	string	2
PSMA2	PSMB4	0.999	string	2
PSMA2	PSMB5	0.999	string	2
PSMA2	PSMB7	0.999	string	2
PSMA2	PSMA1	0.999	string	2
PSMA2	PSMB6	0.999	string	2
PSMA2	PSME4	0.998	string	2
PSMA2	UCHL5	0.998	string	2
PSMA2	USP14	0.997	string	2
PSMA2	PSMA8	0.996	string	2
PSMA2	POMP	0.995	string	2
PSMA2	DESI1	0.994	string	2
PSMA2	PSME1	0.992	string	2
PSMA2	PSMF1	0.978	string	2
PSMA2	RPS27A	0.975	string	2
PSMA2	ADRM1	0.972	string	2
PSMA2	UBB	0.967	string	2
PSMA2	PSMG2	0.954	string	2
PSMA2	UBC	0.945	string	2
PSMA2	AKIRIN2	0.932	string	2
PSMA2	UBA52	0.931	string	2
PPIF	VDAC1	0.999	string	2
PPIF	SLC25A4	0.998	string	2
PPIF	TP53	0.993	string	2
PPIF	SPG7	0.993	string	2
PPIF	ATP5PO	0.989	string	2
PPIF	CYCS	0.983	string	2
PPIF	HSP90AB1	0.982	string	2
PPIF	HSP90AA1	0.982	string	2
PPIF	ITPR1	0.967	string	2
PPIF	SLC25A6	0.965	string	2
PPIF	VDAC3	0.962	string	2
PPIF	BCL2	0.961	string	2
PPIF	SLC25A5	0.961	string	2
PPIF	SLC25A31	0.96	string	2
PPIF	VDAC2	0.958	string	2
PPIF	PPID	0.95	string	2
PPIF	HSPA9	0.932	string	2
PPIF	BAX	0.931	string	2
PPIF	PRKCE	0.916	string	2
PPIF	CCR5	0.907	string	2
PPIF	ITPR3	0.904	string	2
PPIF	C5	0.901	string	2
PPIF	C8A	0.9	string	2
PPIF	C7	0.9	string	2
PPIF	C8B	0.9	string	2
PPIF	C9	0.9	string	2
PPIF	C6	0.9	string	2
KAT2A	TRRAP	0.999	string	2
KAT2A	TADA2A	0.999	string	2
KAT2A	TAF9	0.999	string	2
KAT2A	SGF29	0.999	string	2
KAT2A	WDR5	0.999	string	2
KAT2A	TAF10	0.999	string	2
KAT2A	SUPT3H	0.999	string	2
KAT2A	TADA3	0.999	string	2
KAT2A	USP22	0.998	string	2
KAT2A	TAF12	0.998	string	2
KAT2A	ENY2	0.997	string	2
KAT2A	ATXN7	0.997	string	2
KAT2A	MYC	0.996	string	2
KAT2A	TADA1	0.996	string	2
KAT2A	TADA2B	0.996	string	2
KAT2A	SUPT7L	0.995	string	2
KAT2A	TAF5L	0.995	string	2
KAT2A	EP300	0.994	string	2
KAT2A	SUPT20H	0.994	string	2
KAT2A	TAF6L	0.994	string	2
KAT2A	ATXN7L3	0.994	string	2
KAT2A	TAF6	0.993	string	2
[truncated: 15,713 more rows]

[truncated: 4 more sheets: ST_11, ST_12, ST_13, ST_14]
